# Supplementary material
Source: HighWire-hosted journal article supplement (http://www.qdcxjkg.com/highwire/filestream/113699/field_highwire_adjunct_files/1/supplementary_material_table_e3.pdf)
Supplement: supplementary_material_table_e3.pdf [file supplementary_material_table_e3.pdf]

**Supplementary material**

1

2

3 Christina Orsmark Pietras, PhD,<sup>1</sup> Anna James, PhD,<sup>2</sup> Jon R Konradsen, MD, PhD,<sup>3,4</sup> Björn Nordlund, RN,<sup>3,4</sup> Cilla Söderhäll, PhD,<sup>1</sup> Ville  
4 Pulkkinen, PhD,<sup>2,5</sup> Christophe Pedroletti, MD, PhD,<sup>4</sup> Kameran Daham, MD,<sup>6,7</sup> Maciek Kupczyk, MD, PhD,<sup>2</sup> Barbro Dahlén MD, PhD,<sup>6,7</sup> Juha  
5 Kere, MD, PhD,<sup>1,8</sup> Sven-Erik Dahlén, MD, PhD,<sup>2</sup> Gunilla Hedlin, MD, PhD,<sup>3,4\*</sup> and Erik Melén, MD, PhD,<sup>2,3\*</sup>

6 <sup>1</sup> Department of Biosciences and Nutrition at Novum, Karolinska Institutet (KI)

7 <sup>2</sup> Institute of Environmental Medicine, KI

8 <sup>3</sup> Astrid Lindgren Children's Hospital, Karolinska University Hospital, Stockholm

9 <sup>4</sup> Department of Women's and Children's Health, KI

10 <sup>5</sup> Department of Medical Genetics, Biomedicum Helsinki, University of Helsinki,

11 and Folkhälsan Institute of Genetics, Helsinki, Finland,

12 <sup>6</sup> Lung/allergy clinic at Karolinska University Hospital Huddinge,

13 <sup>7</sup> Department of internal medicine at Huddinge University Hospital, KI

14 <sup>8</sup> Science for Life Laboratory, KI

15 All belonging to The Centre for Allergy Research at Karolinska Institutet, Stockholm, Sweden and being members of GA<sup>2</sup>LEN, The Global  
16 Allergy and Asthma European Network.

17 \*Shared last authorship.

- 18 Correspondence and reprint requests: Sven-Erik Dahlén, MD, PhD, The National Institute of Environmental Medicine, Karolinska Institutet,
- 19 Stockholm, Sweden.
- 20 E-mail: sven-erik.dahlen@ki.se

21 **Table E1.** 1378 significantly differentially expressed genes in asthmatic patients

| ID      | CA vs. Ctrl |          | SA vs. CA |          | SA vs. Ctrl |          | AveExpr | F adj.p* | Chr | Symbol          | Gene name or Transcript description                                                           |
|---------|-------------|----------|-----------|----------|-------------|----------|---------|----------|-----|-----------------|-----------------------------------------------------------------------------------------------|
|         | FC          | adj. p*  | FC        | adj. p*  | FC          | adj. p*  |         |          |     |                 |                                                                                               |
| 8130628 | 1,22        | 2,92E-02 | -1,05     | 5,88E-01 | 1,16        | 8,93E-02 | 6,74    | 1,79E-02 | 6   | <i>AGPAT4</i>   | 1-acylglycerol-3-phosphate O-acyltransferase 4 (lysophosphatidic acid acyltransferase, delta) |
| 8007188 | 1,02        | 8,92E-01 | -1,16     | 1,30E-02 | -1,13       | 3,79E-02 | 8,36    | 1,19E-02 | 17  | <i>CNP</i>      | 2',3'-cyclic nucleotide 3' phosphodiesterase                                                  |
| 7975066 | 1,54        | 4,70E-02 | -1,07     | 7,82E-01 | 1,44        | 6,82E-02 | 6,00    | 2,46E-02 | 14  | <i>AKAP5</i>    | A kinase (PRKA) anchor protein 5                                                              |
| 8008185 | 1,29        | 3,31E-02 | -1,20     | 9,66E-02 | 1,08        | 6,39E-01 | 8,35    | 2,06E-02 | 17  | <i>ABI3</i>     | ABI family, member 3                                                                          |
| 7963646 | 1,08        | 4,07E-01 | -1,22     | 1,18E-03 | -1,13       | 3,54E-02 | 8,23    | 7,68E-04 | 12  | <i>AAAS</i>     | achalasia, adrenocortical insufficiency, alacrimia (Allgrove, triple-A)                       |
| 7947815 | 1,10        | 5,36E-01 | -1,19     | 2,41E-02 | -1,09       | 3,83E-01 | 7,62    | 3,88E-02 | 11  | <i>ACP2</i>     | acid phosphatase 2, lysosomal                                                                 |
| 8103518 | -1,06       | 7,03E-01 | 1,19      | 9,29E-03 | 1,13        | 8,76E-02 | 7,80    | 1,00E-02 | 4   | <i>ANP32C</i>   | acidic (leucine-rich) nuclear phosphoprotein 32 family, member C                              |
| 8073430 | 1,08        | 2,48E-01 | -1,16     | 2,85E-03 | -1,07       | 1,80E-01 | 8,87    | 2,76E-03 | 22  | <i>ACO2</i>     | aconitase 2, mitochondrial                                                                    |
| 8143766 | 1,27        | 5,51E-02 | 1,00      | 9,88E-01 | 1,27        | 2,69E-02 | 5,78    | 1,73E-02 | 7   | <i>ARP11</i>    | actin-related Arp11                                                                           |
| 8075285 | 1,04        | 9,35E-01 | -1,33     | 2,80E-02 | -1,29       | 6,21E-02 | 11,56   | 2,91E-02 | 22  | <i>ASCC2</i>    | activating signal cointegrator 1 complex subunit 2                                            |
| 8178727 | 1,05        | 6,99E-01 | -1,12     | 3,00E-02 | -1,07       | 2,84E-01 | 9,24    | 4,99E-02 | 6   | <i>ATF6B</i>    | activating transcription factor 6 beta                                                        |
| 7930498 | 1,09        | 2,96E-01 | -1,17     | 5,83E-03 | -1,08       | 2,65E-01 | 8,99    | 6,23E-03 | 10  | <i>ACSL5</i>    | acyl-CoA synthetase long-chain family member 5                                                |
| 8065444 | 1,07        | 5,87E-01 | -1,16     | 1,27E-02 | -1,09       | 2,04E-01 | 7,32    | 1,80E-02 | 20  | <i>ACSS1</i>    | acyl-CoA synthetase short-chain family member 1                                               |
| 7924701 | -1,05       | 6,89E-01 | -1,14     | 1,18E-02 | -1,19       | 2,33E-04 | 9,40    | 5,63E-04 | 1   | <i>ACBD3</i>    | acyl-Coenzyme A binding domain containing 3                                                   |
| 7979927 | 1,09        | 6,73E-01 | 1,16      | 1,21E-01 | 1,27        | 1,02E-02 | 5,23    | 1,98E-02 | 14  | <i>ADAM20</i>   | ADAM metallopeptidase domain 20                                                               |
| 8033635 | 1,17        | 3,81E-02 | -1,12     | 9,20E-02 | 1,04        | 6,88E-01 | 7,27    | 2,34E-02 | 19  | <i>ADAMTS10</i> | ADAM metallopeptidase with thrombospondin type 1 motif, 10                                    |
| 8084345 | 1,08        | 5,68E-01 | -1,27     | 8,98E-04 | -1,18       | 9,97E-03 | 10,22   | 3,13E-04 | 3   | <i>AP2M1</i>    | adaptor-related protein complex 2, mu 1 subunit                                               |
| 8093643 | 1,05        | 7,07E-01 | -1,13     | 2,78E-02 | -1,08       | 2,56E-01 | 9,36    | 4,55E-02 | 4   | <i>ADD1</i>     | adducin 1 (alpha)                                                                             |

|         |       |          |       |          |       |          |       |          |    |                 |                                                                                                                        |
|---------|-------|----------|-------|----------|-------|----------|-------|----------|----|-----------------|------------------------------------------------------------------------------------------------------------------------|
| 7946201 | 1,04  | 7,62E-01 | -1,13 | 1,32E-02 | -1,09 | 9,85E-02 | 7,19  | 1,71E-02 | 11 | <i>ARFIP2</i>   | ADP-ribosylation factor interacting protein 2                                                                          |
| 7941104 | 1,11  | 2,84E-01 | -1,16 | 2,29E-02 | -1,05 | 6,32E-01 | 8,17  | 3,09E-02 | 11 | <i>ARL2</i>     | ADP-ribosylation factor-like 2                                                                                         |
| 7996012 | -1,04 | 8,16E-01 | -1,14 | 5,38E-02 | -1,18 | 9,28E-03 | 9,26  | 1,44E-02 | 16 | <i>ARL2BP</i>   | ADP-ribosylation factor-like 2 binding protein                                                                         |
| 7999834 | -1,06 | 6,68E-01 | -1,08 | 1,62E-01 | -1,14 | 1,55E-02 | 12,29 | 2,91E-02 | 16 | <i>ARL6IP1</i>  | ADP-ribosylation factor-like 6 interacting protein 1                                                                   |
| 8109086 | 1,22  | 5,19E-02 | -1,09 | 3,79E-01 | 1,12  | 2,91E-01 | 7,51  | 4,05E-02 | 5  | <i>ADRB2</i>    | adrenergic, beta-2-, receptor, surface                                                                                 |
| 8043993 | 1,10  | 8,26E-01 | 1,37  | 4,69E-02 | 1,51  | 8,19E-03 | 4,75  | 1,21E-02 | 2  | <i>UNQ9419</i>  | AHPA9419                                                                                                               |
| 8128034 | -1,18 | 7,13E-02 | 1,14  | 9,66E-02 | -1,04 | 8,00E-01 | 9,99  | 3,78E-02 | 6  | <i>AKIRIN2</i>  | akirin 2                                                                                                               |
| 8002347 | 1,11  | 3,40E-01 | -1,17 | 2,80E-02 | -1,05 | 6,19E-01 | 7,97  | 4,04E-02 | 16 | <i>AARS</i>     | alanyl-tRNA synthetase                                                                                                 |
| 7935230 | 1,08  | 6,66E-01 | -1,25 | 6,83E-03 | -1,16 | 7,61E-02 | 7,21  | 6,76E-03 | 10 | <i>ALDH18A1</i> | aldehyde dehydrogenase 18 family, member A1                                                                            |
| 7901110 | 1,04  | 8,26E-01 | -1,18 | 1,55E-02 | -1,13 | 7,56E-02 | 7,87  | 1,79E-02 | 1  | <i>AKRIA1</i>   | aldo-keto reductase family 1, member A1 (aldehyde reductase)                                                           |
| 8180376 | 1,30  | 5,60E-03 | -1,17 | 8,46E-02 | 1,11  | 3,21E-01 | 5,35  | 4,14E-03 | 10 | <i>AKRIC1</i>   | aldo-keto reductase family 1, member C1 (dihydrodiol dehydrogenase 1; 20-alpha (3-alpha)-hydroxysteroid dehydrogenase) |
| 7925929 | 1,96  | 1,23E-03 | -1,51 | 2,68E-02 | 1,29  | 2,33E-01 | 6,03  | 3,28E-04 | 10 | <i>AKRIC3</i>   | aldo-keto reductase family 1, member C3 (3-alpha hydroxysteroid dehydrogenase, type II)                                |
| 8005399 | -1,05 | 7,28E-01 | -1,11 | 5,34E-02 | -1,16 | 4,57E-03 | 9,16  | 8,43E-03 | 17 | <i>ALKBH5</i>   | alkB, alkylation repair homolog 5 (E. coli)                                                                            |
| 8131374 | 1,09  | 4,50E-01 | -1,15 | 2,88E-02 | -1,06 | 5,09E-01 | 7,98  | 4,59E-02 | 7  | <i>AIMP2</i>    | aminoacyl tRNA synthetase complex-interacting multifunctional protein 2                                                |
| 8053214 | 1,05  | 4,81E-01 | -1,11 | 1,32E-02 | -1,05 | 2,90E-01 | 9,48  | 1,96E-02 | 2  | <i>AUP1</i>     | ancient ubiquitous protein 1                                                                                           |
| 7922598 | 1,12  | 4,41E-01 | 1,13  | 1,74E-01 | 1,26  | 5,32E-03 | 3,75  | 1,19E-02 | 1  | <i>ANGPTL1</i>  | angiopoietin-like 1                                                                                                    |
| 8164572 | 1,08  | 5,13E-01 | -1,14 | 2,78E-02 | -1,06 | 4,46E-01 | 7,89  | 4,52E-02 | 9  | <i>ASB6</i>     | ankyrin repeat and SOCS box-containing 6                                                                               |
| 8054054 | 1,29  | 5,32E-02 | 1,04  | 7,83E-01 | 1,34  | 8,96E-03 | 9,16  | 8,54E-03 | 2  | <i>ANKRD36B</i> | ankyrin repeat domain 36B                                                                                              |
| 8057990 | 1,07  | 4,03E-01 | 1,06  | 3,10E-01 | 1,13  | 1,29E-02 | 10,46 | 2,52E-02 | 2  | <i>ANKRD44</i>  | ankyrin repeat domain 44                                                                                               |
| 7919729 | -1,03 | 8,92E-01 | -1,18 | 1,18E-02 | -1,21 | 1,80E-03 | 8,52  | 2,32E-03 | 1  | <i>APH1A</i>    | anterior pharynx defective 1 homolog A (C. elegans)                                                                    |
| 7937020 | -1,08 | 7,09E-01 | -1,16 | 1,26E-01 | -1,26 | 1,43E-02 | 6,45  | 2,61E-02 | 10 | <i>MKI67</i>    | antigen identified by monoclonal antibody Ki-67                                                                        |
| 8167854 | 1,09  | 3,16E-01 | -1,14 | 2,67E-02 | -1,04 | 6,34E-01 | 7,03  | 3,67E-02 | X  | <i>APEX2</i>    | APEX nuclease (apurinic/apyrimidinic endonuclease) 2                                                                   |

|         |       |          |       |          |       |          |       |          |    |                 |                                                                                                    |
|---------|-------|----------|-------|----------|-------|----------|-------|----------|----|-----------------|----------------------------------------------------------------------------------------------------|
| 7973056 | -1,03 | 8,86E-01 | -1,14 | 6,52E-02 | -1,18 | 2,24E-02 | 9,99  | 2,81E-02 | 14 | <i>APEX1</i>    | APEX nuclease (multifunctional DNA repair enzyme) 1                                                |
| 7906185 | 1,14  | 1,34E-01 | -1,21 | 7,12E-03 | -1,06 | 5,25E-01 | 7,85  | 6,40E-03 | 1  | <i>APOA1BP</i>  | apolipoprotein A-I binding protein                                                                 |
| 8073068 | 1,18  | 8,61E-02 | -1,27 | 3,87E-03 | -1,08 | 4,71E-01 | 9,75  | 3,11E-03 | 22 | <i>APOBEC3C</i> | apolipoprotein B mRNA editing enzyme, catalytic polypeptide-like 3C                                |
| 8073072 | 1,15  | 1,88E-01 | -1,17 | 4,97E-02 | -1,02 | 9,27E-01 | 8,92  | 4,90E-02 | 22 | <i>APOBEC3D</i> | apolipoprotein B mRNA editing enzyme, catalytic polypeptide-like 3D                                |
| 8073081 | 1,14  | 1,86E-01 | -1,23 | 7,23E-03 | -1,08 | 4,51E-01 | 8,75  | 7,27E-03 | 22 | <i>APOBEC3F</i> | apolipoprotein B mRNA editing enzyme, catalytic polypeptide-like 3F                                |
| 8180374 | 1,25  | 1,46E-02 | -1,21 | 2,19E-02 | 1,03  | 8,62E-01 | 8,39  | 5,14E-03 | 22 | <i>APOBEC3F</i> | apolipoprotein B mRNA editing enzyme, catalytic polypeptide-like 3F                                |
| 8073088 | 1,38  | 1,44E-02 | -1,32 | 2,32E-02 | 1,05  | 8,43E-01 | 8,55  | 5,14E-03 | 22 | <i>APOBEC3G</i> | apolipoprotein B mRNA editing enzyme, catalytic polypeptide-like 3G                                |
| 8027117 | 1,12  | 1,27E-01 | -1,13 | 4,54E-02 | -1,00 | 9,74E-01 | 7,03  | 3,53E-02 | 19 | <i>ARMC6</i>    | armadillo repeat containing 6                                                                      |
| 8131614 | -1,22 | 9,00E-02 | -1,01 | 9,51E-01 | -1,23 | 3,52E-02 | 9,29  | 2,63E-02 | 7  | <i>AHR</i>      | aryl hydrocarbon receptor                                                                          |
| 7993071 | 1,09  | 2,35E-01 | -1,14 | 1,65E-02 | -1,04 | 6,06E-01 | 7,71  | 2,10E-02 | 16 | <i>ALG1</i>     | asparagine-linked glycosylation 1, beta-1,4-mannosyltransferase homolog ( <i>S. cerevisiae</i> )   |
| 8076851 | 1,03  | 8,00E-01 | -1,11 | 2,42E-02 | -1,08 | 1,49E-01 | 7,72  | 3,50E-02 | 22 | <i>ALG12</i>    | asparagine-linked glycosylation 12, alpha-1,6-mannosyltransferase homolog ( <i>S. cerevisiae</i> ) |
| 8092457 | 1,05  | 7,64E-01 | -1,21 | 5,83E-03 | -1,15 | 3,67E-02 | 9,28  | 4,84E-03 | 3  | <i>ALG3</i>     | asparagine-linked glycosylation 3, alpha-1,3-mannosyltransferase homolog ( <i>S. cerevisiae</i> )  |
| 7951633 | 1,04  | 8,31E-01 | -1,15 | 2,22E-02 | -1,11 | 1,10E-01 | 7,90  | 2,90E-02 | 11 | <i>ALG9</i>     | asparagine-linked glycosylation 9, alpha-1,2-mannosyltransferase homolog ( <i>S. cerevisiae</i> )  |
| 8150988 | -1,12 | 4,83E-01 | 1,26  | 1,28E-02 | 1,13  | 2,84E-01 | 6,64  | 1,88E-02 | 8  | <i>ASPH</i>     | aspartate beta-hydroxylase                                                                         |
| 8059222 | 1,07  | 5,69E-01 | -1,16 | 1,66E-02 | -1,08 | 2,78E-01 | 7,62  | 2,67E-02 | 2  | <i>DNPEP</i>    | aspartyl aminopeptidase                                                                            |
| 8124040 | -1,00 | 9,92E-01 | 1,14  | 4,93E-02 | 1,14  | 6,21E-02 | 8,43  | 4,47E-02 | 6  | <i>ATXN1</i>    | ataxin 1                                                                                           |
| 8142098 | -1,08 | 7,07E-01 | -1,15 | 1,17E-01 | -1,23 | 1,26E-02 | 8,28  | 2,30E-02 | 7  | <i>ATXN7L1</i>  | ataxin 7-like 1                                                                                    |
| 8077858 | 1,07  | 7,50E-01 | 1,16  | 9,33E-02 | 1,24  | 1,14E-02 | 8,34  | 2,00E-02 | 3  | <i>ATG7</i>     | ATG7 autophagy related 7 homolog ( <i>S. cerevisiae</i> )                                          |
| 7948997 | 1,06  | 7,52E-01 | -1,19 | 1,74E-02 | -1,12 | 1,46E-01 | 7,91  | 2,56E-02 | 11 | <i>ATL3</i>     | atlastin GTPase 3                                                                                  |
| 8015460 | 1,06  | 3,99E-01 | -1,11 | 1,85E-02 | -1,04 | 4,53E-01 | 9,26  | 2,81E-02 | 17 | <i>ACLY</i>     | ATP citrate lyase                                                                                  |
| 7964234 | 1,06  | 5,87E-01 | -1,15 | 7,12E-03 | -1,09 | 1,11E-01 | 11,46 | 7,59E-03 | 12 | <i>ATP5B</i>    | ATP synthase, H <sup>+</sup> transporting, mitochondrial F1 complex, beta polypeptide              |

|         |       |          |       |          |       |          |       |          |    |                  |                                                                        |
|---------|-------|----------|-------|----------|-------|----------|-------|----------|----|------------------|------------------------------------------------------------------------|
| 8037037 | -1,02 | 9,31E-01 | -1,14 | 5,76E-02 | -1,16 | 2,98E-02 | 7,94  | 3,29E-02 | 19 | <i>ATP5SL</i>    | ATP5S-like                                                             |
| 8165345 | 1,21  | 4,38E-02 | -1,14 | 1,36E-01 | 1,06  | 6,09E-01 | 7,61  | 3,14E-02 | 9  | <i>ABCA2</i>     | ATP-binding cassette, sub-family A (ABC1), member 2                    |
| 8018038 | 1,13  | 5,28E-01 | 1,12  | 3,13E-01 | 1,27  | 2,43E-02 | 6,77  | 4,41E-02 | 17 | <i>ABCA5</i>     | ATP-binding cassette, sub-family A (ABC1), member 5                    |
| 8084360 | 1,09  | 3,64E-01 | -1,14 | 3,01E-02 | -1,05 | 6,12E-01 | 7,34  | 4,46E-02 | 3  | <i>ABCF3</i>     | ATP-binding cassette, sub-family F (GCN20), member 3                   |
| 8133233 | 1,26  | 2,25E-02 | -1,13 | 1,92E-01 | 1,11  | 3,52E-01 | 6,23  | 1,76E-02 | 7  | <i>AUTS2</i>     | autism susceptibility candidate 2                                      |
| 7901418 | 1,00  | 9,91E-01 | -1,14 | 3,61E-02 | -1,14 | 4,36E-02 | 10,10 | 2,95E-02 | 1  | <i>BTF3L4</i>    | basic transcription factor 3-like 4                                    |
| 8069561 | -1,02 | 9,37E-01 | -1,15 | 4,87E-02 | -1,17 | 2,49E-02 | 8,47  | 2,56E-02 | 1  | <i>BTF3L4</i>    | basic transcription factor 3-like 4                                    |
| 7969933 | -1,01 | 9,86E-01 | -1,18 | 3,00E-02 | -1,19 | 2,50E-02 | 6,95  | 1,93E-02 | 13 | <i>BIVM</i>      | basic, immunoglobulin-like variable motif containing                   |
| 8160260 | 1,52  | 1,77E-02 | -1,25 | 1,79E-01 | 1,21  | 3,28E-01 | 5,44  | 1,40E-02 | 9  | <i>BNC2</i>      | basonuclin 2                                                           |
| 8140061 | -1,02 | 9,12E-01 | -1,13 | 8,52E-02 | -1,16 | 4,03E-02 | 8,87  | 4,71E-02 | 7  | <i>BCL7B</i>     | B-cell CLL/lymphoma 7B                                                 |
| 8125766 | 1,15  | 1,58E-01 | -1,19 | 2,42E-02 | -1,03 | 8,15E-01 | 8,08  | 2,45E-02 | 6  | <i>BAK1</i>      | BCL2-antagonist/killer 1                                               |
| 8160647 | 1,02  | 9,57E-01 | -1,27 | 4,22E-02 | -1,24 | 7,80E-02 | 9,21  | 4,41E-02 | 9  | <i>BAG1</i>      | BCL2-associated athanogene                                             |
| 8065569 | 1,03  | 9,47E-01 | -1,28 | 4,31E-02 | -1,24 | 9,02E-02 | 12,02 | 4,82E-02 | 20 | <i>BCL2L1</i>    | BCL2-like 1                                                            |
| 8047538 | 1,06  | 7,74E-01 | -1,18 | 2,87E-02 | -1,12 | 1,98E-01 | 8,42  | 4,48E-02 | 2  | <i>BMPR2</i>     | bone morphogenetic protein receptor, type II (serine/threonine kinase) |
| 7995040 | -1,06 | 7,44E-01 | -1,14 | 1,05E-01 | -1,21 | 1,30E-02 | 7,66  | 2,32E-02 | 16 | <i>BCKDK</i>     | branched chain ketoacid dehydrogenase kinase                           |
| 8087885 | -1,01 | 9,59E-01 | -1,10 | 5,32E-02 | -1,11 | 3,82E-02 | 8,37  | 3,55E-02 | 3  | <i>BAP1</i>      | BRCA1 associated protein-1 (ubiquitin carboxy-terminal hydrolase)      |
| 7958352 | -1,10 | 5,21E-01 | -1,10 | 2,73E-01 | -1,21 | 1,78E-02 | 6,85  | 3,39E-02 | 12 | <i>BTBD11</i>    | BTB (POZ) domain containing 11                                         |
| 8068105 | -1,09 | 5,56E-01 | 1,19  | 2,96E-02 | 1,09  | 4,20E-01 | 9,16  | 4,96E-02 | 21 | <i>BACH1</i>     | BTB and CNC homology 1, basic leucine zipper transcription factor 1    |
| 8158725 | 1,02  | 9,13E-01 | -1,13 | 1,65E-02 | -1,11 | 4,27E-02 | 6,99  | 1,61E-02 | 9  | <i>ABL1</i>      | c-abl oncogene 1, receptor tyrosine kinase                             |
| 8063761 | -1,06 | 5,80E-01 | 1,14  | 1,85E-02 | 1,07  | 2,90E-01 | 5,27  | 3,04E-02 | 20 | <i>CDH26</i>     | cadherin-like 26                                                       |
| 8123230 | -1,07 | 8,48E-01 | 1,30  | 2,83E-02 | 1,22  | 1,29E-01 | 7,85  | 3,90E-02 | 6  | <i>LOC729603</i> | calcium binding protein P22 pseudogene                                 |
| 8020653 | 1,09  | 3,13E-01 | 1,04  | 5,06E-01 | 1,13  | 2,30E-02 | 4,95  | 3,59E-02 | 18 | <i>CABYR</i>     | calcium binding tyrosine-(Y)-phosphorylation regulated                 |
| 8087691 | 1,35  | 1,07E-02 | -1,26 | 3,78E-02 | 1,08  | 6,62E-01 | 6,80  | 5,25E-03 | 3  | <i>CACNA2D2</i>  | calcium channel, voltage-dependent, alpha 2/delta subunit 2            |

|         |       |          |       |          |       |          |       |          |    |                |                                                                |
|---------|-------|----------|-------|----------|-------|----------|-------|----------|----|----------------|----------------------------------------------------------------|
| 7913237 | 1,04  | 8,73E-01 | -1,21 | 3,32E-02 | -1,16 | 1,28E-01 | 6,63  | 4,41E-02 | 1  | <i>CAMK2N1</i> | calcium/calmodulin-dependent protein kinase II inhibitor 1     |
| 8029831 | 1,03  | 7,92E-01 | -1,11 | 2,29E-02 | -1,08 | 1,47E-01 | 10,31 | 3,33E-02 | 19 | <i>CALM3</i>   | calmodulin 3 (phosphorylase kinase, delta)                     |
| 8165046 | -1,10 | 2,98E-01 | -1,06 | 3,69E-01 | -1,16 | 1,04E-02 | 7,42  | 1,97E-02 | 9  | <i>CAMSAP1</i> | calmodulin regulated spectrin-associated protein 1             |
| 8028172 | 1,06  | 5,81E-01 | -1,20 | 1,89E-03 | -1,13 | 3,26E-02 | 10,55 | 1,69E-03 | 19 | <i>CAPNS1</i>  | calpain, small subunit 1                                       |
| 7995712 | 1,09  | 7,88E-01 | 1,21  | 1,36E-01 | 1,32  | 2,76E-02 | 5,89  | 4,36E-02 | 16 | <i>CAPNS2</i>  | calpain, small subunit 2                                       |
| 8026106 | 1,07  | 4,10E-01 | -1,13 | 2,64E-02 | -1,05 | 5,25E-01 | 9,71  | 4,05E-02 | 19 | <i>CALR</i>    | calreticulin                                                   |
| 8155096 | 1,04  | 8,53E-01 | -1,18 | 1,67E-02 | -1,13 | 7,56E-02 | 7,72  | 2,05E-02 | 9  | <i>CREB3</i>   | cAMP responsive element binding protein 3                      |
| 7962112 | 1,04  | 8,86E-01 | -1,21 | 3,39E-02 | -1,17 | 1,17E-01 | 7,28  | 4,41E-02 | 12 | <i>CAPRN2</i>  | caprin family member 2                                         |
| 8147112 | 1,10  | 7,14E-01 | -1,28 | 2,78E-02 | -1,17 | 2,45E-01 | 6,47  | 4,52E-02 | 8  | <i>CA13</i>    | carbonic anhydrase XIII                                        |
| 8110971 | -1,38 | 2,00E-01 | -1,14 | 5,42E-01 | -1,57 | 1,31E-02 | 5,84  | 2,05E-02 | 5  | <i>CMBL</i>    | carboxymethylenebutenolidase homolog (Pseudomonas)             |
| 8164535 | 1,05  | 8,86E-01 | -1,25 | 3,45E-02 | -1,19 | 1,18E-01 | 7,80  | 4,47E-02 | 9  | <i>CRAT</i>    | carnitine acetyltransferase                                    |
| 8133938 | 1,20  | 3,02E-02 | -1,10 | 2,17E-01 | 1,09  | 3,74E-01 | 6,48  | 2,35E-02 | 7  | <i>CROT</i>    | carnitine O-octanoyltransferase                                |
| 8089261 | 1,23  | 3,88E-02 | -1,11 | 2,84E-01 | 1,11  | 3,44E-01 | 9,37  | 3,26E-02 | 3  | <i>CBLB</i>    | Cas-Br-M (murine) ecotropic retroviral transforming sequence b |
| 8076056 | 1,08  | 5,25E-01 | -1,15 | 2,19E-02 | -1,07 | 3,71E-01 | 7,86  | 3,50E-02 | 22 | <i>CSNK1E</i>  | casein kinase 1, epsilon                                       |
| 8179298 | 1,07  | 6,68E-01 | -1,17 | 2,21E-02 | -1,10 | 2,48E-01 | 10,90 | 3,51E-02 | 6  | <i>CSNK2B</i>  | casein kinase 2, beta polypeptide                              |
| 8137874 | 1,19  | 1,93E-02 | -1,17 | 2,47E-02 | 1,02  | 8,78E-01 | 8,33  | 6,90E-03 | 7  | <i>CARD11</i>  | caspase recruitment domain family, member 11                   |
| 8103389 | 1,11  | 5,80E-01 | -1,26 | 2,18E-02 | -1,13 | 3,14E-01 | 7,22  | 3,47E-02 | 4  | <i>CTSO</i>    | cathepsin O                                                    |
| 8001693 | 1,03  | 8,07E-01 | -1,10 | 2,48E-02 | -1,07 | 1,48E-01 | 10,53 | 3,55E-02 | 16 | <i>CNOT1</i>   | CCR4-NOT transcription complex, subunit 1                      |
| 7921677 | 1,36  | 3,69E-02 | -1,20 | 1,82E-01 | 1,14  | 4,68E-01 | 8,53  | 2,71E-02 | 1  | <i>CD244</i>   | CD244 molecule, natural killer cell receptor 2B4               |
| 7922040 | 1,48  | 3,11E-03 | -1,21 | 1,26E-01 | 1,23  | 1,24E-01 | 9,55  | 1,75E-03 | 1  | <i>CD247</i>   | CD247 molecule, CD3                                            |
| 7953428 | -1,04 | 8,30E-01 | -1,21 | 8,42E-03 | -1,26 | 5,30E-04 | 10,21 | 7,85E-04 | 12 | <i>CD4</i>     | CD4 molecule                                                   |
| 7939341 | -1,03 | 7,53E-01 | -1,06 | 1,15E-01 | -1,10 | 1,61E-02 | 11,43 | 2,76E-02 | 11 | <i>CD44</i>    | CD44 molecule (Indian blood group)                             |
| 7947425 | -1,15 | 1,63E-01 | -1,04 | 6,54E-01 | -1,20 | 1,69E-02 | 8,29  | 2,22E-02 | 11 | <i>CD59</i>    | CD59 molecule, complement regulatory protein                   |

|         |       |          |       |          |       |          |       |          |    |                |                                                                                                                                                                                                                                                |
|---------|-------|----------|-------|----------|-------|----------|-------|----------|----|----------------|------------------------------------------------------------------------------------------------------------------------------------------------------------------------------------------------------------------------------------------------|
| 8081564 | 1,19  | 4,48E-02 | -1,16 | 6,36E-02 | 1,03  | 8,26E-01 | 10,15 | 2,34E-02 | 3  | <i>CD96</i>    | CD96 molecule                                                                                                                                                                                                                                  |
| 8173217 | 1,11  | 5,11E-01 | -1,21 | 2,22E-02 | -1,10 | 3,91E-01 | 7,86  | 3,53E-02 | X  | <i>ARHGEF9</i> | Cdc42 guanine nucleotide exchange factor (GEF) 9                                                                                                                                                                                               |
| 7918911 | 1,03  | 9,05E-01 | 1,15  | 6,43E-02 | 1,19  | 2,69E-02 | 7,20  | 3,18E-02 | 1  | ---            | cdna:Genscan<br>chromosome:GRCh37:1:117075558:117076621:-1 ///<br>cdna:pseudogene<br>chromosome:GRCh37:1:117075558:117076714:-1<br>gene:ENSG00000177173                                                                                        |
| 7898673 | 1,00  | 9,91E-01 | -1,11 | 3,90E-02 | -1,11 | 4,87E-02 | 7,04  | 3,35E-02 | 1  | ---            | cdna:Genscan chromosome:GRCh37:1:21710086:21724749:1<br>/// cdna:pseudogene<br>chromosome:GRCh37:1:21724483:21724833:1<br>gene:ENSG00000236216                                                                                                 |
| 7925128 | -1,01 | 9,41E-01 | -1,11 | 7,31E-02 | -1,12 | 4,36E-02 | 7,77  | 4,65E-02 | 1  | ---            | cdna:Genscan<br>chromosome:GRCh37:1:234492450:234492887:-1 ///<br>cdna:pseudogene<br>chromosome:GRCh37:1:234492450:234492887:-1<br>gene:ENSG00000235605                                                                                        |
| 7935054 | -1,03 | 8,65E-01 | 1,18  | 1,03E-02 | 1,14  | 3,40E-02 | 5,45  | 8,26E-03 | 10 | ---            | cdna:Genscan<br>chromosome:GRCh37:10:94428529:94429500:-1 ///<br>cdna:pseudogene<br>chromosome:GRCh37:10:94428502:94429500:-1<br>gene:ENSG00000236493 /// cdna:pseudogene<br>chromosome:GRCh37:10:94428529:94429500:-1<br>gene:ENSG00000236493 |
| 7974617 | 1,04  | 8,65E-01 | 1,16  | 6,36E-02 | 1,21  | 1,69E-02 | 5,11  | 2,32E-02 | 14 | ---            | cdna:Genscan<br>chromosome:GRCh37:14:58751643:58752182:1 ///<br>cdna:pseudogene<br>chromosome:GRCh37:14:58751491:58752113:1<br>gene:ENSG00000180189                                                                                            |
| 7979925 | 1,09  | 6,68E-01 | 1,14  | 1,68E-01 | 1,24  | 1,64E-02 | 3,65  | 3,08E-02 | 14 | ---            | cdna:Genscan<br>chromosome:GRCh37:14:70935739:70937933:-1 ///<br>cdna:pseudogene<br>chromosome:GRCh37:14:70935877:70937825:-1<br>gene:ENSG00000176082 /// Homo sapiens, clone<br>IMA GE:5170866, mRNA.                                         |
| 8073293 | 1,02  | 9,26E-01 | 1,12  | 6,16E-02 | 1,14  | 3,10E-02 | 4,93  | 3,44E-02 | 22 | ---            | cdna:Genscan<br>chromosome:GRCh37:22:40965292:40965436:1 ///<br>cdna:pseudogene<br>chromosome:GRCh37:22:40965290:40965899:1                                                                                                                    |



|         |       |          |       |          |       |          |      |          |    |     |                                                                                                                                                                                                                                                                                                                                                                                    |
|---------|-------|----------|-------|----------|-------|----------|------|----------|----|-----|------------------------------------------------------------------------------------------------------------------------------------------------------------------------------------------------------------------------------------------------------------------------------------------------------------------------------------------------------------------------------------|
| 8105739 | 1,05  | 7,19E-01 | 1,09  | 1,65E-01 | 1,15  | 2,30E-02 | 6,63 | 3,95E-02 | 5  | --- | gene:ENSG00000172912 /// cdna:pseudogene<br>chromosome:GRCh37:22:40965292:40965904:1<br>gene:ENSG00000172912<br>cdna:Genscan chromosome:GRCh37:5:65867887:65868429:1<br>/// cdna:pseudogene<br>chromosome:GRCh37:5:65867887:65868380:1<br>gene:ENSG00000234838<br>cdna:Genscan chromosome:GRCh37:6:583776:602526:1                                                                 |
| 8116571 | 1,29  | 7,93E-02 | 1,13  | 3,68E-01 | 1,45  | 1,42E-03 | 6,50 | 3,06E-03 | 6  | --- | cdna:Genscan chromosome:GRCh37:9:2875850:2923272:-1<br>/// cdna:pseudogene<br>chromosome:GRCh37:9:2875449:2876427:-1<br>gene:ENSG00000236496<br>cdna:Genscan chromosome:GRCh37:9:5084999:5086381:-1<br>/// cdna:pseudogene<br>chromosome:GRCh37:9:5084995:5086065:-1<br>gene:ENSG00000182347 /// cdna:pseudogene<br>chromosome:GRCh37:9:5084999:5086112:-1<br>gene:ENSG00000182347 |
| 8159873 | 1,01  | 9,59E-01 | -1,16 | 4,68E-02 | -1,14 | 8,37E-02 | 5,87 | 4,93E-02 | 9  | --- | cdna:known chromosome:GRCh37:1:101455761:101457653:1<br>gene:ENSG00000236517 /// Homo sapiens cDNA FLJ20139<br>fis, clone COL07179.                                                                                                                                                                                                                                                |
| 8159959 | 1,05  | 9,08E-01 | 1,36  | 1,57E-02 | 1,42  | 3,76E-03 | 5,05 | 4,16E-03 | 9  | --- | cdna:known chromosome:GRCh37:1:144989309:144991365:1<br>gene:ENSG00000236192 /// Homo sapiens cDNA: FLJ21272<br>fis, clone COL01753.                                                                                                                                                                                                                                               |
| 7903389 | 1,13  | 4,80E-01 | 1,17  | 1,15E-01 | 1,32  | 3,03E-03 | 7,22 | 7,27E-03 | 1  | --- | cdna:known chromosome:GRCh37:10:52152766:52154321:1<br>gene:ENSG00000232016                                                                                                                                                                                                                                                                                                        |
| 7904693 | 1,55  | 4,32E-02 | 1,20  | 3,77E-01 | 1,87  | 7,45E-04 | 6,60 | 1,63E-03 | 1  | --- | cdna:known chromosome:GRCh37:11:3436152:3436887:1<br>gene:ENSG00000182139 /// Homo sapiens cDNA clone<br>MGC:15478 IMAGE:2967661, complete cds.                                                                                                                                                                                                                                    |
| 7927597 | 1,05  | 7,75E-01 | 1,12  | 8,75E-02 | 1,18  | 1,28E-02 | 4,21 | 2,15E-02 | 10 | --- | cdna:known chromosome:GRCh37:12:57810198:57810536:1<br>gene:ENSG00000225061 /// Homo sapiens clone HQ0470<br>PRO0470 mRNA, complete cds.                                                                                                                                                                                                                                           |
| 7937876 | -1,01 | 9,82E-01 | 1,19  | 3,90E-02 | 1,18  | 5,40E-02 | 7,01 | 3,50E-02 | 11 | --- | cdna:known chromosome:GRCh37:5:32149194:32149403:1<br>gene:ENSG00000230760 /// Homo sapiens clone HQ0255<br>PRO0255 mRNA, complete cds.                                                                                                                                                                                                                                            |
| 7956419 | 1,08  | 4,73E-01 | 1,07  | 3,34E-01 | 1,16  | 2,10E-02 | 4,72 | 3,85E-02 | 12 | --- | cdna:known chromosome:GRCh37:8:27204526:27205143:1<br>gene:ENSG00000197825 /// Homo sapiens cDNA FLJ90149<br>fis, clone HEMBB1001978.                                                                                                                                                                                                                                              |
| 8104731 | 1,22  | 5,69E-02 | 1,06  | 5,95E-01 | 1,29  | 3,66E-03 | 4,11 | 4,91E-03 | 5  | --- |                                                                                                                                                                                                                                                                                                                                                                                    |
| 8145529 | 1,09  | 8,04E-01 | 1,25  | 1,08E-01 | 1,37  | 2,10E-02 | 7,30 | 3,34E-02 | 8  | --- |                                                                                                                                                                                                                                                                                                                                                                                    |

|         |       |          |       |          |       |          |      |          |    |              |                                                                                                                                                                              |
|---------|-------|----------|-------|----------|-------|----------|------|----------|----|--------------|------------------------------------------------------------------------------------------------------------------------------------------------------------------------------|
| 8174889 | 1,16  | 8,76E-02 | -1,14 | 7,29E-02 | 1,02  | 9,06E-01 | 4,99 | 3,92E-02 | X  | ---          | cdna:known<br>chromosome:GRCh37:X:122249960:122251634:-1<br>gene:ENSG00000224236                                                                                             |
| 8165888 | 1,23  | 1,10E-01 | 1,10  | 3,93E-01 | 1,35  | 2,48E-03 | 4,82 | 4,84E-03 | X  | ---          | cdna:known chromosome:GRCh37:X:7922621:7924183:1<br>gene:ENSG00000235465                                                                                                     |
| 7909102 | 1,21  | 4,32E-02 | -1,01 | 9,58E-01 | 1,20  | 2,88E-02 | 5,47 | 1,54E-02 | 1  | ---          | cdna:pseudogene<br>chromosome:GRCh37:1:205320375:205320599:1<br>gene:ENSG00000235363                                                                                         |
| 8003800 | -1,08 | 6,06E-01 | 1,17  | 2,68E-02 | 1,08  | 3,46E-01 | 5,69 | 4,47E-02 | 17 | ---          | cdna:pseudogene<br>chromosome:GRCh37:17:3019721:3020751:1<br>gene:ENSG00000142163                                                                                            |
| 8067860 | 1,15  | 6,28E-02 | 1,07  | 3,30E-01 | 1,23  | 8,58E-04 | 3,12 | 1,89E-03 | 21 | ---          | cdna:pseudogene<br>chromosome:GRCh37:21:15373248:15373421:1<br>gene:ENSG00000183249 /// cdna:pseudogene<br>chromosome:GRCh37:21:15373248:15377600:1<br>gene:ENSG00000183249  |
| 8093974 | 1,00  | 9,99E-01 | 1,28  | 4,31E-02 | 1,28  | 4,61E-02 | 5,56 | 3,46E-02 | 4  | ---          | cdna:pseudogene chromosome:GRCh37:4:6852339:6852678:1<br>gene:ENSG00000214696 /// Homo sapiens clone FLB3535<br>PRO0898 mRNA, complete cds.                                  |
| 8149345 | 1,04  | 8,55E-01 | 1,12  | 1,12E-01 | 1,16  | 3,31E-02 | 6,94 | 4,70E-02 | 8  | ---          | cdna:pseudogene<br>chromosome:GRCh37:8:11786293:11786940:-1<br>gene:ENSG00000206014 /// cdna:pseudogene<br>chromosome:GRCh37:2:159731154:159732182:1<br>gene:ENSG00000188668 |
| 8162247 | 1,03  | 9,05E-01 | 1,22  | 1,17E-02 | 1,25  | 1,97E-03 | 7,17 | 2,45E-03 | 9  | ---          | cdna:pseudogene<br>chromosome:GRCh37:9:92054926:92055245:-1<br>gene:ENSG00000176993 /// Homo sapiens clone pp6489<br>unknown mRNA.                                           |
| 8000706 | -1,02 | 9,28E-01 | -1,15 | 3,45E-02 | -1,17 | 1,37E-02 | 9,70 | 1,49E-02 | 16 | <i>CDIPT</i> | CDP-diacylglycerol-inositol 3-phosphatidyltransferase<br>(phosphatidylinositol synthase)                                                                                     |
| 8046488 | -1,12 | 3,44E-01 | -1,06 | 4,80E-01 | -1,18 | 2,43E-02 | 5,15 | 3,94E-02 | 2  | <i>CDCA7</i> | cell division cycle associated 7                                                                                                                                             |
| 8094988 | -1,06 | 3,94E-01 | 1,10  | 3,21E-02 | 1,03  | 5,95E-01 | 3,72 | 4,83E-02 | 4  | <i>CWH43</i> | cell wall biogenesis 43 C-terminal homolog ( <i>S. cerevisiae</i> )                                                                                                          |
| 8040578 | 1,16  | 3,88E-02 | -1,17 | 1,56E-02 | -1,01 | 9,50E-01 | 6,47 | 8,26E-03 | 2  | <i>CENPO</i> | centromere protein O                                                                                                                                                         |
| 8156026 | 1,42  | 4,51E-02 | -1,22 | 2,32E-01 | 1,17  | 4,47E-01 | 7,73 | 3,56E-02 | 9  | <i>CEP78</i> | centrosomal protein 78kDa                                                                                                                                                    |
| 8144279 | 1,13  | 1,01E-01 | 1,07  | 2,97E-01 | 1,22  | 1,23E-03 | 7,60 | 2,97E-03 | 8  | <i>CLN8</i>  | ceroid-lipofuscinosis, neuronal 8 (epilepsy, progressive with<br>mental retardation)                                                                                         |

|         |       |          |       |          |       |          |      |          |    |                  |                                               |
|---------|-------|----------|-------|----------|-------|----------|------|----------|----|------------------|-----------------------------------------------|
| 7920984 | 1,11  | 1,24E-01 | -1,13 | 1,65E-02 | -1,02 | 7,85E-01 | 8,53 | 1,58E-02 | 1  | <i>CCT3</i>      | chaperonin containing TCP1, subunit 3 (gamma) |
| 8042720 | 1,15  | 1,34E-01 | -1,18 | 2,80E-02 | -1,02 | 8,82E-01 | 8,83 | 2,56E-02 | 2  | <i>CCT7</i>      | chaperonin containing TCP1, subunit 7 (eta)   |
| 7966089 | 1,61  | 1,14E-02 | -1,32 | 1,22E-01 | 1,22  | 3,56E-01 | 7,85 | 8,53E-03 | 12 | <i>CMKLR1</i>    | chemokine-like receptor 1                     |
| 8148467 | -1,04 | 8,05E-01 | -1,14 | 3,45E-02 | -1,19 | 4,08E-03 | 8,93 | 6,51E-03 | 8  | <i>CHRAC1</i>    | chromatin accessibility complex 1             |
| 7978187 | -1,05 | 7,03E-01 | 1,18  | 1,39E-03 | 1,13  | 1,16E-02 | 6,43 | 8,04E-04 | 14 | <i>CHMP4A</i>    | chromatin modifying protein 4A                |
| 7901675 | 1,23  | 2,36E-02 | -1,08 | 4,16E-01 | 1,14  | 1,48E-01 | 4,87 | 1,74E-02 | 1  | <i>C1orf177</i>  | chromosome 1 open reading frame 177           |
| 7908161 | 1,46  | 1,46E-02 | -1,17 | 2,95E-01 | 1,24  | 1,70E-01 | 7,44 | 1,14E-02 | 1  | <i>C1orf21</i>   | chromosome 1 open reading frame 21            |
| 7909561 | -1,13 | 1,56E-01 | -1,02 | 8,65E-01 | -1,15 | 4,12E-02 | 4,67 | 3,85E-02 | 1  | <i>C1orf97</i>   | chromosome 1 open reading frame 97            |
| 7929719 | 1,06  | 7,80E-01 | 1,13  | 1,52E-01 | 1,19  | 3,02E-02 | 7,53 | 4,90E-02 | 10 | <i>C10orf28</i>  | chromosome 10 open reading frame 28           |
| 7939723 | 1,08  | 2,80E-01 | -1,14 | 1,08E-02 | -1,06 | 4,08E-01 | 6,37 | 1,22E-02 | 11 | <i>C11orf49</i>  | chromosome 11 open reading frame 49           |
| 7942783 | 1,11  | 7,13E-02 | -1,02 | 7,37E-01 | 1,08  | 1,13E-01 | 5,79 | 3,94E-02 | 11 | <i>C11orf67</i>  | chromosome 11 open reading frame 67           |
| 7967109 | 1,01  | 9,61E-01 | -1,11 | 3,51E-02 | -1,10 | 5,88E-02 | 7,46 | 3,39E-02 | 12 | <i>C12orf43</i>  | chromosome 12 open reading frame 43           |
| 7958950 | 1,03  | 8,15E-01 | -1,12 | 1,74E-02 | -1,09 | 1,01E-01 | 6,95 | 2,34E-02 | 12 | <i>C12orf52</i>  | chromosome 12 open reading frame 52           |
| 7958253 | 1,29  | 6,60E-02 | -1,15 | 2,71E-01 | 1,13  | 4,56E-01 | 8,61 | 4,96E-02 | 12 | <i>C12orf75</i>  | chromosome 12 open reading frame 75           |
| 7971134 | 1,01  | 9,70E-01 | -1,17 | 1,56E-02 | -1,16 | 1,93E-02 | 8,65 | 1,00E-02 | 13 | <i>C13orf23</i>  | chromosome 13 open reading frame 23           |
| 7980309 | 1,16  | 1,04E-01 | -1,20 | 1,56E-02 | -1,03 | 7,95E-01 | 9,86 | 1,36E-02 | 14 | <i>C14orf1</i>   | chromosome 14 open reading frame 1            |
| 7975989 | 1,09  | 6,74E-01 | -1,23 | 2,13E-02 | -1,13 | 2,35E-01 | 9,43 | 3,35E-02 | 14 | <i>C14orf156</i> | chromosome 14 open reading frame 156          |
| 7975595 | 1,03  | 8,06E-01 | -1,13 | 2,18E-02 | -1,09 | 1,28E-01 | 7,51 | 2,98E-02 | 14 | <i>C14orf169</i> | chromosome 14 open reading frame 169          |
| 7979721 | 1,33  | 3,88E-02 | -1,34 | 1,66E-02 | -1,01 | 9,69E-01 | 6,53 | 8,79E-03 | 14 | <i>C14orf83</i>  | chromosome 14 open reading frame 83           |
| 7977868 | -1,05 | 6,49E-01 | -1,07 | 2,34E-01 | -1,13 | 2,59E-02 | 6,95 | 4,59E-02 | 14 | <i>C14orf93</i>  | chromosome 14 open reading frame 93           |
| 7990027 | 1,10  | 7,57E-01 | 1,21  | 1,33E-01 | 1,33  | 2,08E-02 | 6,96 | 3,50E-02 | 15 | <i>C15orf28</i>  | chromosome 15 open reading frame 28           |
| 7985253 | -1,10 | 3,67E-01 | 1,17  | 2,34E-02 | 1,06  | 5,38E-01 | 6,78 | 3,46E-02 | 15 | <i>C15orf37</i>  | chromosome 15 open reading frame 37           |
| 7990636 | 1,16  | 3,66E-02 | 1,02  | 8,28E-01 | 1,18  | 6,97E-03 | 4,28 | 5,78E-03 | 15 | <i>C15orf5</i>   | chromosome 15 open reading frame 5            |

|         |       |          |       |          |       |          |       |          |    |                  |                                      |
|---------|-------|----------|-------|----------|-------|----------|-------|----------|----|------------------|--------------------------------------|
| 7984405 | -1,05 | 8,01E-01 | -1,11 | 1,31E-01 | -1,16 | 2,85E-02 | 6,68  | 4,41E-02 | 15 | <i>C15orf61</i>  | chromosome 15 open reading frame 61  |
| 7993159 | -1,08 | 3,48E-01 | 1,14  | 1,57E-02 | 1,05  | 4,55E-01 | 9,39  | 2,22E-02 | 16 | <i>C16orf72</i>  | chromosome 16 open reading frame 72  |
| 8005305 | -1,03 | 9,21E-01 | -1,27 | 1,55E-02 | -1,31 | 4,15E-03 | 8,07  | 4,29E-03 | 17 | <i>C17orf39</i>  | chromosome 17 open reading frame 39  |
| 8008795 | 1,01  | 9,70E-01 | -1,19 | 4,58E-02 | -1,17 | 7,36E-02 | 6,33  | 4,58E-02 | 17 | <i>C17orf71</i>  | chromosome 17 open reading frame 71  |
| 8011462 | 1,05  | 7,37E-01 | 1,09  | 1,34E-01 | 1,14  | 1,87E-02 | 8,16  | 3,27E-02 | 17 | <i>C17orf85</i>  | chromosome 17 open reading frame 85  |
| 8022941 | 1,11  | 6,66E-01 | -1,28 | 2,18E-02 | -1,16 | 2,45E-01 | 9,64  | 3,44E-02 | 18 | <i>C18orf10</i>  | chromosome 18 open reading frame 10  |
| 8021152 | 1,00  | 9,93E-01 | 1,13  | 3,45E-02 | 1,13  | 3,15E-02 | 4,43  | 2,39E-02 | 18 | <i>C18orf12</i>  | chromosome 18 open reading frame 12  |
| 8032127 | -1,01 | 9,69E-01 | -1,21 | 6,49E-02 | -1,22 | 5,38E-02 | 11,78 | 4,96E-02 | 19 | <i>C19orf22</i>  | chromosome 19 open reading frame 22  |
| 8026698 | 1,08  | 6,95E-01 | -1,23 | 1,30E-02 | -1,14 | 1,43E-01 | 8,68  | 1,80E-02 | 19 | <i>C19orf62</i>  | chromosome 19 open reading frame 62  |
| 8040698 | 1,03  | 8,59E-01 | -1,16 | 1,47E-02 | -1,13 | 5,86E-02 | 7,83  | 1,59E-02 | 2  | <i>C2orf18</i>   | chromosome 2 open reading frame 18   |
| 8050115 | 1,75  | 3,22E-03 | -1,11 | 6,01E-01 | 1,57  | 9,43E-03 | 6,60  | 1,24E-03 | 2  | <i>C2orf46</i>   | chromosome 2 open reading frame 46   |
| 8062286 | 1,04  | 7,53E-01 | -1,18 | 1,74E-03 | -1,13 | 1,08E-02 | 8,14  | 1,09E-03 | 20 | <i>C20orf4</i>   | chromosome 20 open reading frame 4   |
| 8065280 | -1,01 | 9,57E-01 | 1,18  | 1,35E-02 | 1,17  | 1,98E-02 | 9,05  | 8,91E-03 | 20 | <i>C20orf74</i>  | chromosome 20 open reading frame 74  |
| 8060977 | 1,17  | 4,70E-02 | -1,02 | 8,29E-01 | 1,14  | 5,66E-02 | 7,17  | 2,29E-02 | 20 | <i>C20orf94</i>  | chromosome 20 open reading frame 94  |
| 8068664 | 1,01  | 9,43E-01 | 1,10  | 7,68E-02 | 1,11  | 4,67E-02 | 4,52  | 4,98E-02 | 21 | <i>C21orf130</i> | chromosome 21 open reading frame 130 |
| 8068202 | 1,14  | 7,34E-02 | -1,09 | 1,81E-01 | 1,05  | 6,22E-01 | 7,14  | 4,96E-02 | 21 | <i>C21orf63</i>  | chromosome 21 open reading frame 63  |
| 8076826 | 1,03  | 8,87E-01 | 1,17  | 4,58E-02 | 1,21  | 1,32E-02 | 6,13  | 1,70E-02 | 22 | <i>C22orf34</i>  | chromosome 22 open reading frame 34  |
| 8100532 | -1,04 | 7,09E-01 | -1,10 | 4,88E-02 | -1,15 | 3,19E-03 | 8,49  | 6,30E-03 | 4  | <i>C4orf14</i>   | chromosome 4 open reading frame 14   |
| 8093456 | 1,08  | 7,47E-01 | -1,27 | 1,18E-02 | -1,18 | 9,31E-02 | 7,84  | 1,43E-02 | 4  | <i>C4orf42</i>   | chromosome 4 open reading frame 42   |
| 8113113 | -1,02 | 9,82E-01 | 1,39  | 4,93E-02 | 1,37  | 7,13E-02 | 5,32  | 4,78E-02 | 5  | <i>C5orf36</i>   | chromosome 5 open reading frame 36   |
| 8125850 | 1,04  | 7,57E-01 | -1,14 | 1,63E-02 | -1,09 | 1,30E-01 | 8,13  | 2,30E-02 | 6  | <i>C6orf106</i>  | chromosome 6 open reading frame 106  |
| 8130982 | -1,04 | 6,79E-01 | 1,11  | 2,26E-02 | 1,06  | 2,45E-01 | 3,85  | 3,56E-02 | 6  | <i>C6orf123</i>  | chromosome 6 open reading frame 123  |
| 8129649 | -1,16 | 4,45E-01 | -1,21 | 9,65E-02 | -1,41 | 1,83E-03 | 7,87  | 4,84E-03 | 6  | <i>C6orf192</i>  | chromosome 6 open reading frame 192  |

|         |       |          |       |          |       |          |       |          |    |                |                                                            |
|---------|-------|----------|-------|----------|-------|----------|-------|----------|----|----------------|------------------------------------------------------------|
| 8130641 | 1,25  | 4,30E-03 | -1,01 | 9,44E-01 | 1,24  | 2,10E-03 | 5,81  | 8,04E-04 | 6  | <i>C6orf59</i> | chromosome 6 open reading frame 59                         |
| 8133192 | -1,01 | 9,20E-01 | -1,07 | 6,68E-02 | -1,09 | 3,26E-02 | 9,97  | 3,67E-02 | 7  | <i>C7orf42</i> | chromosome 7 open reading frame 42                         |
| 8135902 | 1,37  | 2,13E-02 | 1,19  | 1,73E-01 | 1,63  | 4,10E-05 | 5,93  | 1,44E-04 | 7  | <i>C7orf54</i> | chromosome 7 open reading frame 54                         |
| 8138088 | -1,02 | 9,15E-01 | -1,15 | 1,66E-02 | -1,18 | 4,63E-03 | 8,10  | 4,84E-03 | 7  | <i>C7orf70</i> | chromosome 7 open reading frame 70                         |
| 8149315 | 1,18  | 3,30E-01 | 1,29  | 2,22E-02 | 1,53  | 6,80E-05 | 5,01  | 2,77E-04 | 8  | <i>C8orf15</i> | chromosome 8 open reading frame 15                         |
| 8180229 | 1,13  | 3,10E-01 | 1,14  | 1,15E-01 | 1,29  | 1,17E-03 | 4,88  | 3,23E-03 | 8  | <i>C8orf16</i> | chromosome 8 open reading frame 16                         |
| 8157144 | -1,11 | 2,61E-01 | -1,08 | 2,52E-01 | -1,21 | 3,66E-03 | 7,76  | 8,26E-03 | 9  | <i>C9orf6</i>  | chromosome 9 open reading frame 6                          |
| 8163348 | 1,03  | 8,73E-01 | 1,12  | 6,51E-02 | 1,16  | 1,88E-02 | 3,11  | 2,54E-02 | 9  | <i>C9orf84</i> | chromosome 9 open reading frame 84                         |
| 7996891 | 1,03  | 9,15E-01 | -1,29 | 2,27E-03 | -1,25 | 2,95E-03 | 9,14  | 7,97E-04 | 16 | <i>CIRH1A</i>  | cirrhosis, autosomal recessive 1A (cirhin)                 |
| 8089062 | -1,05 | 6,81E-01 | -1,07 | 2,17E-01 | -1,12 | 2,69E-02 | 10,42 | 4,74E-02 | 3  | <i>CLDND1</i>  | claudin domain containing 1                                |
| 8029560 | 1,01  | 9,61E-01 | -1,14 | 2,38E-02 | -1,13 | 3,75E-02 | 9,30  | 1,99E-02 | 19 | <i>CLPTM1</i>  | cleft lip and palate associated transmembrane protein 1    |
| 7950142 | 1,07  | 4,43E-01 | -1,15 | 1,08E-02 | -1,07 | 2,57E-01 | 7,41  | 1,35E-02 | 11 | <i>CLPB</i>    | ClpB caseinolytic peptidase B homolog (E. coli)            |
| 8021727 | 1,09  | 5,40E-01 | -1,23 | 7,12E-03 | -1,13 | 1,40E-01 | 8,77  | 8,41E-03 | 18 | <i>CNDP2</i>   | CNDP dipeptidase 2 (metallopeptidase M20 family)           |
| 8106393 | 1,30  | 1,61E-02 | -1,18 | 9,95E-02 | 1,10  | 4,88E-01 | 8,20  | 1,16E-02 | 5  | <i>F2R</i>     | coagulation factor II (thrombin) receptor                  |
| 8176245 | -1,05 | 5,69E-01 | -1,07 | 1,39E-01 | -1,13 | 7,32E-03 | 10,36 | 1,50E-02 | X  | <i>F8A1</i>    | coagulation factor VIII-associated (intronic transcript) 1 |
| 7955896 | 1,05  | 7,09E-01 | -1,19 | 5,76E-03 | -1,13 | 4,63E-02 | 9,70  | 4,84E-03 | 12 | <i>COPZ1</i>   | coatamer protein complex, subunit zeta 1                   |
| 8056359 | 1,10  | 5,87E-01 | 1,11  | 2,37E-01 | 1,22  | 1,88E-02 | 3,98  | 3,53E-02 | 2  | <i>COBLL1</i>  | COBL-like 1                                                |
| 8161575 | 1,18  | 6,85E-01 | 1,26  | 2,21E-01 | 1,49  | 2,83E-02 | 6,30  | 4,93E-02 | 9  | <i>CBWD5</i>   | COBW domain containing 5                                   |
| 8094190 | 1,00  | 9,91E-01 | 1,19  | 3,40E-02 | 1,19  | 3,02E-02 | 4,28  | 2,32E-02 | 4  | <i>CC2D2A</i>  | coiled-coil and C2 domain containing 2A                    |
| 7994362 | 1,06  | 7,19E-01 | -1,17 | 1,81E-02 | -1,11 | 1,69E-01 | 8,39  | 2,73E-02 | 16 | <i>CCDC101</i> | coiled-coil domain containing 101                          |
| 8055208 | 1,02  | 9,19E-01 | -1,15 | 2,64E-02 | -1,13 | 6,58E-02 | 7,66  | 2,81E-02 | 2  | <i>CCDC115</i> | coiled-coil domain containing 115                          |
| 7900555 | 1,01  | 9,58E-01 | 1,16  | 3,62E-02 | 1,18  | 2,22E-02 | 5,77  | 2,02E-02 | 1  | <i>CCDC30</i>  | coiled-coil domain containing 30                           |
| 7967486 | 1,14  | 1,86E-01 | -1,17 | 2,84E-02 | -1,03 | 8,15E-01 | 8,41  | 3,08E-02 | 12 | <i>CCDC92</i>  | coiled-coil domain containing 92                           |

|         |       |          |       |          |       |          |       |          |    |                |                                                                     |
|---------|-------|----------|-------|----------|-------|----------|-------|----------|----|----------------|---------------------------------------------------------------------|
| 8057620 | -1,08 | 3,58E-01 | 1,12  | 3,45E-02 | 1,04  | 6,50E-01 | 4,65  | 4,96E-02 | 2  | <i>COL5A2</i>  | collagen, type V, alpha 2                                           |
| 8065637 | 1,08  | 3,97E-01 | -1,16 | 1,39E-02 | -1,07 | 3,71E-01 | 8,23  | 1,97E-02 | 20 | <i>COMMD7</i>  | COMM domain containing 7                                            |
| 7909390 | -1,11 | 7,04E-01 | -1,18 | 1,61E-01 | -1,31 | 1,91E-02 | 8,71  | 3,49E-02 | 1  | <i>CR1L</i>    | complement component (3b/4b) receptor 1-like                        |
| 8002381 | 1,09  | 4,62E-01 | -1,16 | 2,62E-02 | -1,07 | 4,77E-01 | 8,62  | 4,16E-02 | 16 | <i>COG4</i>    | component of oligomeric golgi complex 4                             |
| 8000263 | 1,06  | 6,71E-01 | -1,15 | 2,93E-02 | -1,08 | 3,04E-01 | 6,50  | 4,91E-02 | 16 | <i>COG7</i>    | component of oligomeric golgi complex 7                             |
| 8002272 | 1,02  | 8,73E-01 | -1,10 | 2,78E-02 | -1,08 | 1,09E-01 | 7,78  | 3,57E-02 | 16 | <i>COG8</i>    | component of oligomeric golgi complex 8                             |
| 8134699 | 1,06  | 6,94E-01 | -1,16 | 2,26E-02 | -1,09 | 2,35E-01 | 9,49  | 3,55E-02 | 7  | <i>COPS6</i>   | COP9 constitutive photomorphogenic homolog subunit 6 (Arabidopsis)  |
| 7953395 | 1,01  | 9,60E-01 | -1,15 | 2,00E-02 | -1,14 | 3,10E-02 | 8,59  | 1,61E-02 | 12 | <i>COPS7A</i>  | COP9 constitutive photomorphogenic homolog subunit 7A (Arabidopsis) |
| 8049088 | 1,03  | 8,25E-01 | -1,12 | 2,59E-02 | -1,09 | 1,36E-01 | 7,82  | 3,61E-02 | 2  | <i>COPS7B</i>  | COP9 constitutive photomorphogenic homolog subunit 7B (Arabidopsis) |
| 7986049 | -1,09 | 5,94E-01 | -1,10 | 2,67E-01 | -1,20 | 2,48E-02 | 9,04  | 4,48E-02 | 15 | <i>CRTC3</i>   | CREB regulated transcription coactivator 3                          |
| 8006019 | 1,01  | 9,39E-01 | 1,11  | 4,97E-02 | 1,13  | 2,69E-02 | 4,33  | 2,71E-02 | 17 | <i>CRYBA1</i>  | crystallin, beta A1                                                 |
| 7970455 | -1,03 | 8,99E-01 | -1,13 | 8,20E-02 | -1,16 | 3,32E-02 | 6,95  | 4,09E-02 | 13 | <i>CRYL1</i>   | crystallin, lambda 1                                                |
| 7936904 | -1,03 | 8,92E-01 | 1,14  | 3,23E-02 | 1,11  | 1,03E-01 | 6,39  | 3,98E-02 | 10 | <i>CTBP2</i>   | C-terminal binding protein 2                                        |
| 8174794 | -1,12 | 1,97E-01 | 1,15  | 3,84E-02 | 1,02  | 8,65E-01 | 8,50  | 4,05E-02 | X  | <i>CUL4B</i>   | cullin 4B                                                           |
| 7951447 | 1,15  | 1,97E-01 | 1,06  | 4,83E-01 | 1,22  | 9,78E-03 | 6,83  | 1,64E-02 | 11 | <i>CWF19L2</i> | CWF19-like 2, cell cycle control (S. pombe)                         |
| 8023344 | 1,06  | 5,77E-01 | -1,12 | 2,93E-02 | -1,06 | 3,98E-01 | 7,22  | 4,93E-02 | 18 | <i>CXXC1</i>   | CXXC finger 1 (PHD domain)                                          |
| 8113010 | 1,04  | 8,59E-01 | 1,15  | 6,46E-02 | 1,20  | 1,65E-02 | 7,85  | 2,32E-02 | 5  | <i>CCNH</i>    | cyclin H                                                            |
| 8101212 | -1,05 | 6,52E-01 | -1,10 | 4,01E-02 | -1,15 | 1,55E-03 | 11,92 | 3,70E-03 | 4  | <i>CCNI</i>    | cyclin I                                                            |
| 7956076 | 1,05  | 7,26E-01 | -1,15 | 2,41E-02 | -1,10 | 2,07E-01 | 7,21  | 3,71E-02 | 12 | <i>CDK2</i>    | cyclin-dependent kinase 2                                           |
| 7923378 | 1,06  | 7,64E-01 | -1,22 | 1,17E-02 | -1,15 | 8,00E-02 | 8,38  | 1,29E-02 | 1  | <i>CSRPI</i>   | cysteine and glycine-rich protein 1                                 |
| 8113641 | -1,05 | 7,09E-01 | 1,14  | 2,52E-02 | 1,09  | 2,34E-01 | 4,74  | 4,08E-02 | 5  | <i>CDO1</i>    | cysteine dioxygenase, type I                                        |
| 8041447 | 1,26  | 3,88E-02 | -1,23 | 4,34E-02 | 1,03  | 8,90E-01 | 6,80  | 1,71E-02 | 2  | <i>CRIMI</i>   | cysteine rich transmembrane BMP regulator 1 (chordin-like)          |
| 8003824 | 1,01  | 9,57E-01 | -1,20 | 1,56E-02 | -1,18 | 2,42E-02 | 7,42  | 1,12E-02 | 17 | <i>CTNS</i>    | cystinosis, nephropathic                                            |

|         |       |          |       |          |       |          |      |          |    |                 |                                                          |
|---------|-------|----------|-------|----------|-------|----------|------|----------|----|-----------------|----------------------------------------------------------|
| 8079993 | 1,09  | 4,58E-01 | -1,15 | 2,78E-02 | -1,06 | 4,94E-01 | 7,16 | 4,42E-02 | 3  | <i>CYB561D2</i> | cytochrome b-561 domain containing 2                     |
| 8001552 | 1,02  | 9,41E-01 | -1,15 | 2,93E-02 | -1,13 | 6,17E-02 | 7,59 | 3,03E-02 | 16 | <i>CIAPIN1</i>  | cytokine induced apoptosis inhibitor 1                   |
| 7947694 | 1,09  | 3,81E-01 | -1,15 | 2,42E-02 | -1,06 | 5,34E-01 | 7,90 | 3,57E-02 | 11 | <i>CKAP5</i>    | cytoskeleton associated protein 5                        |
| 7948534 | 1,08  | 5,80E-01 | -1,23 | 3,68E-03 | -1,14 | 5,87E-02 | 9,38 | 3,44E-03 | 11 | <i>DDB1</i>     | damage-specific DNA binding protein 1, 127kDa            |
| 8088128 | -1,06 | 6,77E-01 | -1,10 | 1,55E-01 | -1,17 | 1,51E-02 | 8,62 | 2,81E-02 | 3  | <i>DCP1A</i>    | DCP1 decapping enzyme homolog A ( <i>S. cerevisiae</i> ) |
| 7973545 | 1,04  | 8,18E-01 | -1,17 | 2,00E-02 | -1,12 | 1,11E-01 | 8,40 | 2,65E-02 | 14 | <i>DCAF11</i>   | DDB1 and CUL4 associated factor 11                       |
| 7979849 | 1,12  | 1,33E-01 | -1,12 | 4,34E-02 | -1,01 | 9,58E-01 | 9,59 | 3,52E-02 | 14 | <i>DCAF5</i>    | DDB1 and CUL4 associated factor 5                        |
| 7979223 | 1,18  | 8,36E-02 | 1,00  | 9,72E-01 | 1,18  | 3,63E-02 | 8,23 | 2,56E-02 | 14 | <i>DDHD1</i>    | DDHD domain containing 1                                 |
| 7904000 | -1,06 | 7,88E-01 | -1,15 | 8,69E-02 | -1,22 | 1,37E-02 | 7,68 | 2,30E-02 | 1  | <i>DDX20</i>    | DEAD (Asp-Glu-Ala-Asp) box polypeptide 20                |
| 7962869 | 1,13  | 2,13E-01 | -1,15 | 4,69E-02 | -1,02 | 8,90E-01 | 8,74 | 4,94E-02 | 12 | <i>DDX23</i>    | DEAD (Asp-Glu-Ala-Asp) box polypeptide 23                |
| 8116096 | 1,07  | 5,14E-01 | -1,15 | 1,03E-02 | -1,08 | 2,03E-01 | 8,84 | 1,27E-02 | 5  | <i>DDX41</i>    | DEAD (Asp-Glu-Ala-Asp) box polypeptide 41                |
| 8027100 | -1,00 | 9,91E-01 | -1,10 | 4,97E-02 | -1,10 | 4,94E-02 | 7,31 | 3,94E-02 | 19 | <i>DDX49</i>    | DEAD (Asp-Glu-Ala-Asp) box polypeptide 49                |
| 7921793 | -1,05 | 7,03E-01 | -1,09 | 1,07E-01 | -1,14 | 1,02E-02 | 9,17 | 1,93E-02 | 1  | <i>DEDD</i>     | death effector domain containing                         |
| 8065552 | 1,10  | 2,24E-01 | 1,03  | 6,82E-01 | 1,13  | 2,95E-02 | 3,52 | 3,74E-02 | 20 | <i>DEFB116</i>  | defensin, beta 116                                       |
| 7912537 | 1,21  | 7,80E-02 | -1,23 | 2,00E-02 | -1,02 | 9,08E-01 | 7,85 | 1,49E-02 | 1  | <i>DHRS3</i>    | dehydrogenase/reductase (SDR family) member 3            |
| 7909568 | 1,07  | 8,49E-01 | -1,29 | 3,26E-02 | -1,21 | 1,45E-01 | 6,26 | 4,56E-02 | 1  | <i>DTL</i>      | denticleless homolog ( <i>Drosophila</i> )               |
| 8034454 | 1,10  | 3,84E-01 | -1,17 | 2,42E-02 | -1,06 | 5,30E-01 | 8,01 | 3,58E-02 | 19 | <i>DHPS</i>     | deoxyhypusine synthase                                   |
| 8152628 | 1,03  | 8,73E-01 | -1,14 | 1,57E-02 | -1,11 | 5,79E-02 | 9,86 | 1,71E-02 | 8  | <i>DERL1</i>    | Der1-like domain family, member 1                        |
| 8005313 | 1,08  | 5,20E-01 | -1,16 | 1,89E-02 | -1,07 | 3,47E-01 | 8,00 | 3,07E-02 | 17 | <i>DRG2</i>     | developmentally regulated GTP binding protein 2          |
| 7986685 | 1,05  | 8,08E-01 | -1,20 | 1,18E-02 | -1,15 | 6,33E-02 | 8,42 | 1,28E-02 | 16 | <i>DEXI</i>     | De xi homolog (mouse)                                    |
| 7999419 | 1,04  | 8,48E-01 | -1,28 | 3,03E-03 | -1,22 | 8,67E-03 | 7,13 | 1,63E-03 | 16 | <i>DEXI</i>     | De xi homolog (mouse)                                    |
| 8168691 | 1,09  | 6,87E-01 | 1,14  | 1,74E-01 | 1,24  | 1,91E-02 | 6,84 | 3,53E-02 | X  | <i>DIAPH2</i>   | diaphanous homolog 2 ( <i>Drosophila</i> )               |
| 8019376 | 1,07  | 4,69E-01 | -1,13 | 1,55E-02 | -1,06 | 3,32E-01 | 7,85 | 2,30E-02 | 17 | <i>DUS1L</i>    | dihydrouridine synthase 1-like ( <i>S. cerevisiae</i> )  |

|         |       |          |       |          |       |          |       |          |    |                |                                                                                                               |
|---------|-------|----------|-------|----------|-------|----------|-------|----------|----|----------------|---------------------------------------------------------------------------------------------------------------|
| 7941621 | 1,09  | 4,50E-01 | -1,17 | 2,25E-02 | -1,07 | 4,48E-01 | 7,71  | 3,51E-02 | 11 | <i>DPP3</i>    | dipeptidyl-peptidase 3                                                                                        |
| 8032871 | 1,10  | 2,69E-01 | -1,15 | 2,52E-02 | -1,04 | 6,74E-01 | 7,41  | 3,35E-02 | 19 | <i>DPP9</i>    | dipeptidyl-peptidase 9                                                                                        |
| 7910559 | 1,05  | 7,69E-01 | 1,12  | 9,15E-02 | 1,18  | 1,29E-02 | 6,20  | 2,19E-02 | 1  | <i>DISC1</i>   | disrupted in schizophrenia 1                                                                                  |
| 7904131 | -1,08 | 6,52E-01 | -1,14 | 8,50E-02 | -1,23 | 5,07E-03 | 6,58  | 1,05E-02 | 1  | <i>DCLRE1B</i> | DNA cross-link repair 1B (PSO2 homolog, <i>S. cerevisiae</i> )                                                |
| 7912303 | 1,02  | 9,23E-01 | -1,13 | 3,58E-02 | -1,11 | 8,95E-02 | 7,37  | 4,11E-02 | 1  | <i>DFFA</i>    | DNA fragmentation factor, 45kDa, alpha polypeptide                                                            |
| 7963935 | 1,04  | 7,89E-01 | -1,20 | 5,76E-03 | -1,15 | 2,91E-02 | 7,93  | 4,34E-03 | 12 | <i>DNAJC14</i> | DnaJ (Hsp40) homolog, subfamily C, member 14                                                                  |
| 7898192 | 1,01  | 9,57E-01 | -1,14 | 3,84E-02 | -1,13 | 7,12E-02 | 8,24  | 3,95E-02 | 1  | <i>DNAJC16</i> | DnaJ (Hsp40) homolog, subfamily C, member 16                                                                  |
| 7952185 | 1,02  | 9,21E-01 | -1,26 | 2,27E-03 | -1,23 | 2,75E-03 | 8,63  | 7,85E-04 | 11 | <i>DPAGT1</i>  | dolichyl-phosphate (UDP-N-acetylglucosamine) N-acetylglucosaminophosphotransferase 1 (GlcNAc-1-P transferase) |
| 8164336 | 1,05  | 8,86E-01 | -1,29 | 2,86E-02 | -1,23 | 1,00E-01 | 8,40  | 3,57E-02 | 9  | <i>DPM2</i>    | dolichyl-phosphate mannosyltransferase polypeptide 2, regulatory subunit                                      |
| 8154128 | 1,02  | 9,51E-01 | 1,20  | 5,14E-02 | 1,22  | 3,15E-02 | 3,31  | 3,14E-02 | NA | <i>DSERGI</i>  | Down syndrome encephalopathy related protein 1                                                                |
| 7900911 | 1,06  | 6,78E-01 | -1,16 | 2,14E-02 | -1,09 | 2,33E-01 | 6,73  | 3,35E-02 | 1  | <i>DPH2</i>    | DPH2 homolog ( <i>S. cerevisiae</i> )                                                                         |
| 8068551 | -1,11 | 1,27E-01 | -1,02 | 7,81E-01 | -1,14 | 2,22E-02 | 10,11 | 2,35E-02 | 21 | <i>DYRK1A</i>  | dual-specificity tyrosine-(Y)-phosphorylation regulated kinase 1A                                             |
| 8053107 | 1,03  | 8,35E-01 | -1,10 | 2,52E-02 | -1,08 | 1,23E-01 | 8,47  | 3,47E-02 | 2  | <i>DCTN1</i>   | dynactin 1 (p150, glued homolog, <i>Drosophila</i> )                                                          |
| 7964466 | 1,01  | 9,54E-01 | -1,14 | 1,60E-02 | -1,13 | 2,69E-02 | 8,74  | 1,24E-02 | 12 | <i>DCTN2</i>   | dynactin 2 (p50)                                                                                              |
| 7938128 | 1,25  | 3,88E-02 | -1,13 | 2,03E-01 | 1,10  | 4,56E-01 | 6,85  | 3,08E-02 | 11 | <i>DNHD1</i>   | dynein heavy chain domain 1                                                                                   |
| 7938133 | 1,16  | 7,34E-02 | -1,02 | 8,24E-01 | 1,13  | 8,40E-02 | 6,40  | 3,53E-02 | 11 | <i>DNHD1</i>   | dynein heavy chain domain 1                                                                                   |
| 7933872 | -1,33 | 8,77E-03 | 1,11  | 3,10E-01 | -1,19 | 1,04E-01 | 6,31  | 6,07E-03 | 10 | <i>EGR2</i>    | early growth response 2                                                                                       |
| 8149720 | -1,39 | 3,78E-02 | 1,20  | 2,09E-01 | -1,15 | 4,35E-01 | 6,23  | 2,88E-02 | 8  | <i>EGR3</i>    | early growth response 3                                                                                       |
| 8037621 | 1,12  | 5,80E-02 | -1,05 | 3,89E-01 | 1,07  | 3,00E-01 | 6,30  | 4,49E-02 | 19 | <i>EML2</i>    | echinoderm microtubule associated protein like 2                                                              |
| 8112615 | 1,37  | 4,37E-02 | -1,31 | 5,33E-02 | 1,05  | 8,59E-01 | 6,72  | 2,10E-02 | 5  | <i>ENC1</i>    | ectodermal-neural cortex (with BTB-like domain)                                                               |
| 8126750 | 1,53  | 3,66E-02 | -1,32 | 1,27E-01 | 1,16  | 5,77E-01 | 5,89  | 2,48E-02 | 6  | <i>ENPP5</i>   | ectonucleotide pyrophosphatase/phosphodiesterase 5 (putative function)                                        |
| 8016099 | 1,09  | 4,08E-01 | -1,16 | 1,95E-02 | -1,06 | 4,51E-01 | 9,26  | 2,99E-02 | 17 | <i>EFTUD2</i>  | elongation factor Tu GTP binding domain containing 2                                                          |



|         |       |          |       |          |       |          |       |          |    |                  |                                                                                        |
|---------|-------|----------|-------|----------|-------|----------|-------|----------|----|------------------|----------------------------------------------------------------------------------------|
| 7915504 | 1,01  | 9,79E-01 | -1,16 | 2,41E-02 | -1,16 | 3,15E-02 | 10,01 | 1,86E-02 | 1  | <i>ELOVL1</i>    | elongation of very long chain fatty acids (FEN1/Elo2, SUR4/Elo3, yeast)-like 1         |
| 8167305 | 1,14  | 2,86E-01 | -1,23 | 1,74E-02 | -1,07 | 5,64E-01 | 7,18  | 2,43E-02 | X  | <i>EBP</i>       | emopamil binding protein (sterol isomerase)                                            |
| 7996685 | 1,06  | 4,89E-01 | -1,12 | 1,60E-02 | -1,06 | 3,32E-01 | 8,28  | 2,45E-02 | 16 | <i>EDC4</i>      | enhancer of mRNA decapping 4                                                           |
| 8005994 | 1,06  | 7,71E-01 | -1,22 | 1,17E-02 | -1,15 | 7,56E-02 | 8,64  | 1,24E-02 | 17 | <i>ERAL1</i>     | Era G-protein-like 1 (E. coli)                                                         |
| 8062174 | -1,00 | 9,95E-01 | -1,19 | 8,99E-03 | -1,20 | 4,63E-03 | 9,49  | 3,06E-03 | 20 | <i>ERGIC3</i>    | ERGIC and golgi 3                                                                      |
| 7988033 | 1,11  | 8,25E-01 | -1,48 | 2,53E-02 | -1,33 | 1,34E-01 | 9,54  | 3,54E-02 | 15 | <i>EPB42</i>     | erythrocyte membrane protein band 4.2                                                  |
| 8153457 | -1,03 | 8,85E-01 | 1,18  | 2,12E-02 | 1,14  | 7,12E-02 | 6,25  | 2,37E-02 | 8  | <i>EEF1D</i>     | eukaryotic translation elongation factor 1 delta (guanine nucleotide exchange protein) |
| 7968411 | 1,07  | 4,83E-01 | 1,07  | 2,30E-01 | 1,14  | 1,07E-02 | 7,00  | 2,18E-02 | 13 | <i>EEF1DP3</i>   | eukaryotic translation elongation factor 1 delta pseudogene 3                          |
| 8083333 | -1,04 | 7,53E-01 | -1,09 | 1,46E-01 | -1,13 | 2,31E-02 | 8,91  | 3,88E-02 | 3  | <i>EIF2A</i>     | eukaryotic translation initiation factor 2A, 65kDa                                     |
| 8084303 | 1,10  | 1,74E-01 | -1,11 | 3,39E-02 | -1,02 | 8,72E-01 | 6,97  | 3,37E-02 | 3  | <i>EIF2B5</i>    | eukaryotic translation initiation factor 2B, subunit 5 epsilon, 82kDa                  |
| 8072946 | -1,02 | 9,04E-01 | -1,08 | 8,78E-02 | -1,10 | 3,82E-02 | 11,50 | 4,63E-02 | 22 | <i>EIF3L</i>     | eukaryotic translation initiation factor 3, subunit L                                  |
| 7928119 | -1,05 | 7,19E-01 | -1,09 | 1,08E-01 | -1,14 | 1,21E-02 | 10,72 | 2,18E-02 | 10 | <i>EIF4EBP2</i>  | eukaryotic translation initiation factor 4E binding protein 2                          |
| 8075507 | 1,02  | 8,95E-01 | -1,10 | 1,66E-02 | -1,09 | 5,11E-02 | 8,08  | 1,74E-02 | 22 | <i>EIF4ENIF1</i> | eukaryotic translation initiation factor 4E nuclear import factor 1                    |
| 7928630 | -1,11 | 7,65E-01 | -1,23 | 1,27E-01 | -1,37 | 2,08E-02 | 8,61  | 3,47E-02 | 10 | <i>EIF5AL1</i>   | eukaryotic translation initiation factor 5A-like 1                                     |
| 8072206 | 1,00  | 9,92E-01 | 1,09  | 5,36E-02 | 1,09  | 5,57E-02 | 8,27  | 4,52E-02 | 22 | <i>EWSR1</i>     | Ewing sarcoma breakpoint region 1                                                      |
| 8037537 | 1,08  | 4,98E-01 | -1,25 | 1,18E-03 | -1,15 | 2,44E-02 | 7,49  | 7,32E-04 | 19 | <i>ERCC2</i>     | excision repair cross-complementing rodent repair deficiency, complementation group 2  |
| 8110685 | -1,04 | 8,12E-01 | -1,14 | 1,56E-02 | -1,18 | 1,30E-03 | 7,20  | 2,11E-03 | 5  | <i>EXOC3</i>     | exocyst complex component 3                                                            |
| 8136293 | 1,13  | 4,32E-02 | -1,06 | 3,03E-01 | 1,06  | 3,36E-01 | 8,23  | 3,47E-02 | 7  | <i>EXOC4</i>     | exocyst complex component 4                                                            |
| 8079294 | 1,12  | 1,50E-01 | 1,02  | 8,22E-01 | 1,14  | 3,24E-02 | 6,65  | 3,33E-02 | 3  | <i>EXOSC7</i>    | exosome component 7                                                                    |
| 8126588 | 1,08  | 5,28E-01 | -1,18 | 1,41E-02 | -1,09 | 2,68E-01 | 7,41  | 2,07E-02 | 6  | <i>XPO5</i>      | exportin 5                                                                             |
| 8127391 | 1,11  | 7,86E-01 | 1,29  | 9,00E-02 | 1,43  | 1,44E-02 | 4,19  | 2,37E-02 | 6  | <i>EYS</i>       | eyes shut homolog (Drosophila)                                                         |
| 7905831 | 1,07  | 1,65E-01 | -1,08 | 5,50E-02 | -1,00 | 9,72E-01 | 6,89  | 4,90E-02 | 1  | <i>FLAD1</i>     | FAD1 flavin adenine dinucleotide synthetase homolog (S. cerevisiae)                    |

|         |       |          |       |          |       |          |       |          |    |                 |                                                      |
|---------|-------|----------|-------|----------|-------|----------|-------|----------|----|-----------------|------------------------------------------------------|
| 7904948 | 1,32  | 2,76E-02 | -1,29 | 2,44E-02 | 1,02  | 9,32E-01 | 10,34 | 8,75E-03 | 19 | <i>FAM108A1</i> | family with sequence similarity 108, member A1       |
| 8074842 | 1,29  | 1,03E-02 | -1,20 | 4,41E-02 | 1,07  | 6,13E-01 | 9,29  | 5,47E-03 | 19 | <i>FAM108A1</i> | family with sequence similarity 108, member A1       |
| 7924230 | 1,20  | 3,42E-02 | -1,12 | 1,74E-01 | 1,08  | 4,63E-01 | 8,16  | 2,50E-02 | 19 | <i>FAM108A1</i> | family with sequence similarity 108, member A1       |
| 8026751 | 1,07  | 4,60E-01 | -1,14 | 1,76E-02 | -1,06 | 3,87E-01 | 7,28  | 2,79E-02 | 19 | <i>FAM125A</i>  | family with sequence similarity 125, member A        |
| 8170009 | -1,02 | 9,15E-01 | -1,13 | 4,46E-02 | -1,15 | 1,78E-02 | 8,40  | 1,99E-02 | X  | <i>FAM127A</i>  | family with sequence similarity 127, member A        |
| 8140942 | 1,15  | 3,53E-01 | 1,15  | 1,61E-01 | 1,33  | 2,74E-03 | 7,52  | 6,63E-03 | 7  | <i>FAM133B</i>  | family with sequence similarity 133, member B        |
| 8048468 | -1,06 | 7,53E-01 | -1,11 | 1,69E-01 | -1,17 | 2,87E-02 | 8,51  | 4,74E-02 | 2  | <i>FAM134A</i>  | family with sequence similarity 134, member A        |
| 8015655 | 1,09  | 2,51E-01 | -1,15 | 9,38E-03 | -1,06 | 4,15E-01 | 9,27  | 1,07E-02 | 17 | <i>FAM134C</i>  | family with sequence similarity 134, member C        |
| 8112649 | 1,24  | 9,39E-02 | -1,19 | 1,12E-01 | 1,04  | 8,23E-01 | 6,43  | 4,99E-02 | 5  | <i>FAM169A</i>  | family with sequence similarity 169, member A        |
| 7932285 | 1,16  | 6,60E-02 | -1,01 | 8,82E-01 | 1,14  | 5,94E-02 | 7,02  | 2,82E-02 | 10 | <i>FAM188A</i>  | family with sequence similarity 188, member A        |
| 7908612 | -1,04 | 8,07E-01 | 1,16  | 1,50E-02 | 1,12  | 8,63E-02 | 6,65  | 1,81E-02 | 1  | <i>FAM58B</i>   | family with sequence similarity 58, member B         |
| 7987536 | 1,14  | 1,51E-01 | -1,19 | 1,65E-02 | -1,04 | 7,29E-01 | 7,84  | 1,73E-02 | 15 | <i>FAM82A2</i>  | family with sequence similarity 82, member A2        |
| 7982574 | 1,14  | 2,01E-01 | 1,02  | 8,03E-01 | 1,17  | 4,33E-02 | 6,02  | 4,63E-02 | 15 | <i>FAM98B</i>   | family with sequence similarity 98, member B         |
| 8097288 | 1,24  | 8,19E-02 | -1,04 | 7,83E-01 | 1,19  | 1,09E-01 | 4,50  | 4,36E-02 | 4  | <i>FAT4</i>     | FAT tumor suppressor homolog 4 (Drosophila)          |
| 8029693 | -1,98 | 8,45E-03 | 1,08  | 7,97E-01 | -1,83 | 1,02E-02 | 7,45  | 2,86E-03 | 19 | <i>FOSB</i>     | FBJ murine osteosarcoma viral oncogene homolog B     |
| 8071713 | 1,17  | 3,88E-02 | -1,08 | 2,59E-01 | 1,08  | 3,67E-01 | 7,48  | 3,09E-02 | 22 | <i>FBXW4P1</i>  | F-box and WD repeat domain containing 4 pseudogene 1 |
| 8165319 | 1,11  | 2,75E-01 | -1,16 | 2,47E-02 | -1,05 | 6,62E-01 | 8,84  | 3,32E-02 | 9  | <i>FBXW5</i>    | F-box and WD repeat domain containing 5              |
| 7925996 | -1,02 | 8,93E-01 | -1,14 | 1,74E-02 | -1,16 | 3,93E-03 | 8,42  | 4,64E-03 | 10 | <i>FBXO18</i>   | F-box protein, helicase, 18                          |
| 7906475 | 1,62  | 6,60E-02 | -1,45 | 1,02E-01 | 1,12  | 7,73E-01 | 9,50  | 3,66E-02 | 1  | <i>FCRL6</i>    | Fc receptor-like 6                                   |
| 8024898 | 1,01  | 9,61E-01 | -1,16 | 4,05E-02 | -1,15 | 6,97E-02 | 6,95  | 4,09E-02 | 19 | <i>FEM1A</i>    | fem-1 homolog a (C. elegans)                         |
| 7984470 | -1,06 | 3,74E-01 | -1,07 | 9,62E-02 | -1,13 | 1,30E-03 | 8,74  | 3,58E-03 | 15 | <i>FEM1B</i>    | fem-1 homolog b (C. elegans)                         |
| 8003056 | 1,18  | 1,84E-01 | 1,14  | 1,79E-01 | 1,34  | 9,85E-04 | 5,38  | 2,76E-03 | 16 | <i>GAF A2</i>   | FGF-2 activity-associated protein 2                  |
| 8099807 | 1,07  | 8,13E-01 | 1,18  | 1,13E-01 | 1,27  | 2,44E-02 | 4,92  | 3,70E-02 | 4  | <i>GAF A3</i>   | FGF-2 activity-associated protein 3                  |

|         |       |          |       |          |       |          |       |          |    |                |                                                                        |
|---------|-------|----------|-------|----------|-------|----------|-------|----------|----|----------------|------------------------------------------------------------------------|
| 8099471 | 1,74  | 3,69E-02 | -1,36 | 2,09E-01 | 1,28  | 4,27E-01 | 9,51  | 2,76E-02 | 4  | <i>FGFBP2</i>  | fibroblast growth factor binding protein 2                             |
| 8013307 | -1,08 | 6,70E-01 | -1,13 | 1,73E-01 | -1,22 | 1,75E-02 | 12,08 | 3,28E-02 | 17 | <i>FOXO3B</i>  | forkhead box O3B pseudogene                                            |
| 7963092 | 1,25  | 8,82E-03 | -1,22 | 1,57E-02 | 1,03  | 8,47E-01 | 7,50  | 3,11E-03 | 12 | <i>FMNL3</i>   | formin-like 3                                                          |
| 7969794 | 1,23  | 2,98E-01 | 1,12  | 4,46E-01 | 1,37  | 1,59E-02 | 6,14  | 2,69E-02 | 13 | <i>UNQ1829</i> | FRSS1829                                                               |
| 8100292 | 1,15  | 1,86E-01 | 1,11  | 2,08E-01 | 1,28  | 1,30E-03 | 7,86  | 3,53E-03 | 4  | <i>FRYL</i>    | FRY-like                                                               |
| 8167270 | 1,04  | 8,12E-01 | -1,16 | 1,22E-02 | -1,12 | 6,37E-02 | 7,74  | 1,34E-02 | X  | <i>FTSJ1</i>   | FtsJ homolog 1 (E. coli)                                               |
| 8119198 | 1,08  | 6,42E-01 | -1,25 | 3,68E-03 | -1,16 | 4,35E-02 | 8,01  | 3,11E-03 | 6  | <i>FTSJD2</i>  | FtsJ methyltransferase domain containing 2                             |
| 7995069 | 1,09  | 3,89E-01 | 1,08  | 2,49E-01 | 1,18  | 7,83E-03 | 9,96  | 1,64E-02 | 16 | <i>FUS</i>     | fusion (involved in t(12;16) in malignant liposarcoma)                 |
| 8128956 | 1,14  | 8,49E-02 | -1,11 | 1,09E-01 | 1,03  | 8,08E-01 | 9,85  | 4,63E-02 | 6  | <i>FYN</i>     | FYN oncogene related to SRC, FGR, YES                                  |
| 8172548 | 1,09  | 2,48E-01 | -1,14 | 1,41E-02 | -1,05 | 5,36E-01 | 7,79  | 1,75E-02 | X  | <i>GPKOW</i>   | G patch domain and KOW motifs                                          |
| 8010747 | 1,07  | 4,38E-01 | -1,15 | 1,11E-02 | -1,07 | 2,68E-01 | 8,77  | 1,40E-02 | 17 | <i>GPS1</i>    | G protein pathway suppressor 1                                         |
| 7996064 | 1,32  | 2,56E-02 | -1,19 | 1,45E-01 | 1,12  | 4,66E-01 | 8,25  | 1,92E-02 | 16 | <i>GPR114</i>  | G protein-coupled receptor 114                                         |
| 8091503 | 1,20  | 5,06E-01 | -1,38 | 2,80E-02 | -1,16 | 4,55E-01 | 7,39  | 4,59E-02 | 3  | <i>GPR171</i>  | G protein-coupled receptor 171                                         |
| 8157727 | 1,54  | 5,19E-03 | 1,25  | 1,34E-01 | 1,93  | 4,00E-06 | 6,43  | 1,37E-05 | 9  | <i>GPR21</i>   | G protein-coupled receptor 21                                          |
| 7907531 | 1,47  | 1,16E-02 | 1,28  | 8,36E-02 | 1,89  | 4,00E-06 | 6,77  | 2,08E-05 | 1  | <i>GPR52</i>   | G protein-coupled receptor 52                                          |
| 7996081 | 1,74  | 2,41E-02 | -1,51 | 6,46E-02 | 1,15  | 6,88E-01 | 9,42  | 1,42E-02 | 16 | <i>GPR56</i>   | G protein-coupled receptor 56                                          |
| 7983616 | 1,17  | 2,94E-02 | -1,06 | 3,88E-01 | 1,10  | 1,89E-01 | 7,56  | 2,18E-02 | 15 | <i>GALK2</i>   | galactokinase 2                                                        |
| 8027169 | 1,05  | 7,13E-01 | -1,14 | 2,44E-02 | -1,08 | 2,22E-01 | 9,35  | 3,85E-02 | 19 | <i>GATAD2A</i> | GATA zinc finger domain containing 2A                                  |
| 8123562 | 1,11  | 7,52E-02 | 1,01  | 8,86E-01 | 1,12  | 2,07E-02 | 7,13  | 1,74E-02 | 6  | <i>GMDS</i>    | GDP-mannose 4,6-dehydratase                                            |
| 8150103 | 1,10  | 5,86E-01 | 1,13  | 1,51E-01 | 1,25  | 9,00E-03 | 7,79  | 1,84E-02 | 8  | <i>GTF2E2</i>  | general transcription factor IIE, polypeptide 2, beta 34kDa            |
| 8000425 | 1,09  | 1,85E-01 | -1,10 | 3,71E-02 | -1,01 | 8,78E-01 | 7,79  | 3,75E-02 | 16 | <i>GTF3C1</i>  | general transcription factor IIIC, polypeptide 1, alpha 220kDa         |
| 8158961 | 1,07  | 5,11E-01 | -1,15 | 1,27E-02 | -1,08 | 2,56E-01 | 7,38  | 1,80E-02 | 9  | <i>GTF3C5</i>  | general transcription factor IIIC, polypeptide 5, 63kDa                |
| 8165684 | -1,25 | 4,01E-01 | -1,17 | 3,77E-01 | -1,46 | 1,88E-02 | 9,16  | 3,44E-02 | M  | ---            | gi 17981852 ref NC_001807.4 :12267-12337; gene=TRNL2; product=tRNA-Leu |

|         |       |          |       |          |       |          |      |          |    |                |                                                                             |
|---------|-------|----------|-------|----------|-------|----------|------|----------|----|----------------|-----------------------------------------------------------------------------|
| 7996211 | 1,05  | 7,19E-01 | -1,14 | 2,95E-02 | -1,08 | 2,52E-01 | 5,95 | 4,87E-02 | 16 | <i>GINS3</i>   | GINS complex subunit 3 (Psf3 homolog)                                       |
| 7917676 | 1,22  | 2,34E-01 | 1,08  | 5,70E-01 | 1,32  | 1,91E-02 | 5,73 | 2,85E-02 | 1  | <i>GLMN</i>    | glomulin, FKBP associated protein                                           |
| 8131496 | 1,01  | 9,34E-01 | -1,11 | 3,62E-02 | -1,10 | 8,41E-02 | 8,99 | 4,05E-02 | 7  | <i>GLCC11</i>  | glucocorticoid induced transcript 1                                         |
| 7899504 | -1,06 | 5,80E-01 | -1,09 | 1,28E-01 | -1,16 | 6,97E-03 | 7,84 | 1,42E-02 | 1  | <i>GMEB1</i>   | glucocorticoid modulatory element binding protein 1                         |
| 8007561 | 1,07  | 6,97E-01 | -1,19 | 1,41E-02 | -1,12 | 1,51E-01 | 7,71 | 1,97E-02 | 17 | <i>G6PC3</i>   | glucose 6 phosphatase, catalytic, 3                                         |
| 8027621 | 1,06  | 7,39E-01 | -1,18 | 2,87E-02 | -1,11 | 2,32E-01 | 9,45 | 4,63E-02 | 19 | <i>GPI</i>     | glucose phosphate isomerase                                                 |
| 7948744 | 1,07  | 5,82E-01 | -1,18 | 7,27E-03 | -1,11 | 1,21E-01 | 9,62 | 8,43E-03 | 11 | <i>GANAB</i>   | glucosidase, alpha; neutral AB                                              |
| 8139859 | 1,07  | 5,17E-01 | -1,14 | 2,53E-02 | -1,06 | 4,23E-01 | 8,06 | 4,14E-02 | 7  | <i>GUSB</i>    | glucuronidase, beta                                                         |
| 8177544 | 1,29  | 5,19E-02 | 1,08  | 5,67E-01 | 1,40  | 2,83E-03 | 9,44 | 4,21E-03 | 5  | <i>SMA4</i>    | glucuronidase, beta pseudogene                                              |
| 8124469 | 1,23  | 1,23E-01 | 1,07  | 5,78E-01 | 1,32  | 8,17E-03 | 9,04 | 1,17E-02 | 6  | <i>GUSBL1</i>  | glucuronidase, beta-like 1                                                  |
| 8111455 | 1,25  | 5,19E-02 | -1,01 | 9,20E-01 | 1,23  | 4,18E-02 | 8,58 | 2,09E-02 | 6  | <i>GUSBL1</i>  | glucuronidase, beta-like 1                                                  |
| 7934852 | 1,02  | 9,11E-01 | -1,13 | 1,93E-02 | -1,11 | 5,12E-02 | 9,88 | 1,97E-02 | 10 | <i>GLUD1</i>   | glutamate dehydrogenase 1                                                   |
| 7935627 | 1,13  | 1,72E-01 | -1,28 | 8,98E-04 | -1,13 | 7,43E-02 | 7,37 | 3,44E-04 | 10 | <i>GOT1</i>    | glutamic-oxaloacetic transaminase 1, soluble (aspartate aminotransferase 1) |
| 8018673 | 1,03  | 8,38E-01 | 1,09  | 6,68E-02 | 1,12  | 1,49E-02 | 5,87 | 2,21E-02 | 17 | <i>QRICH2</i>  | glutamine rich 2                                                            |
| 8087271 | 1,05  | 7,39E-01 | -1,15 | 1,85E-02 | -1,10 | 1,61E-01 | 9,61 | 2,76E-02 | 3  | <i>QRICH1</i>  | glutamine-rich 1                                                            |
| 8065817 | 1,12  | 2,24E-01 | -1,15 | 3,34E-02 | -1,03 | 7,98E-01 | 7,38 | 3,77E-02 | 20 | <i>GSS</i>     | glutathione synthetase                                                      |
| 8091120 | 1,38  | 7,41E-03 | -1,07 | 6,25E-01 | 1,29  | 1,97E-02 | 6,40 | 3,28E-03 | 3  | <i>GK5</i>     | glycerol kinase 5 (putative)                                                |
| 8038261 | 1,05  | 6,79E-01 | -1,14 | 2,19E-02 | -1,08 | 2,38E-01 | 7,66 | 3,47E-02 | 19 | <i>GYS1</i>    | glycogen synthase 1 (muscle)                                                |
| 8037152 | -1,02 | 9,30E-01 | -1,14 | 3,39E-02 | -1,16 | 1,37E-02 | 9,87 | 1,48E-02 | 19 | <i>GSK3A</i>   | glycogen synthase kinase 3 alpha                                            |
| 7922029 | -1,15 | 3,57E-01 | -1,11 | 3,18E-01 | -1,27 | 1,07E-02 | 7,37 | 2,10E-02 | 1  | <i>GPA33</i>   | glycoprotein A33 (transmembrane)                                            |
| 8148715 | 1,07  | 4,05E-01 | -1,12 | 1,93E-02 | -1,05 | 4,52E-01 | 8,89 | 2,95E-02 | 8  | <i>GPAA1</i>   | glycosylphosphatidylinositol anchor attachment protein 1 homolog (yeast)    |
| 8155250 | 1,05  | 8,32E-01 | -1,22 | 1,82E-02 | -1,16 | 9,11E-02 | 7,38 | 2,35E-02 | 9  | <i>GRHPR</i>   | glyoxylate reductase/hydroxypyruvate reductase                              |
| 7987027 | 1,35  | 1,51E-02 | -1,10 | 4,62E-01 | 1,23  | 8,80E-02 | 7,70 | 1,05E-02 | 15 | <i>GOLGA9P</i> | golgi autoantigen, golgin subfamily a, 9 pseudogene                         |

|         |       |          |       |          |       |          |       |          |    |                  |                                                                              |
|---------|-------|----------|-------|----------|-------|----------|-------|----------|----|------------------|------------------------------------------------------------------------------|
| 7987139 | 1,50  | 2,97E-02 | -1,20 | 2,93E-01 | 1,24  | 2,73E-01 | 7,40  | 2,32E-02 | 15 | <i>GOLGA9P</i>   | golgi autoantigen, golgin subfamily a, 9 pseudogene                          |
| 7985472 | 1,01  | 9,74E-01 | 1,22  | 6,14E-02 | 1,23  | 5,33E-02 | 6,99  | 4,75E-02 | 15 | <i>FLJ40113</i>  | golgi autoantigen, golgin subfamily a-like pseudogene                        |
| 8041000 | 1,15  | 1,80E-01 | -1,20 | 1,60E-02 | -1,05 | 6,81E-01 | 7,18  | 1,80E-02 | 2  | <i>GPN1</i>      | GPN-loop GTPase 1                                                            |
| 8101757 | 1,24  | 3,02E-02 | -1,11 | 2,66E-01 | 1,12  | 3,03E-01 | 8,19  | 2,35E-02 | 4  | <i>GPRIN3</i>    | GPRIN family member 3                                                        |
| 8043236 | 1,53  | 1,46E-02 | -1,22 | 2,37E-01 | 1,25  | 2,22E-01 | 10,63 | 1,13E-02 | 2  | <i>GNLY</i>      | granulysin                                                                   |
| 7978366 | 1,73  | 3,06E-03 | -1,29 | 1,27E-01 | 1,34  | 1,02E-01 | 8,55  | 1,36E-03 | 14 | <i>GZMB</i>      | granzyme B (granzyme 2, cytotoxic T-lymphocyte-associated serine esterase 1) |
| 8023977 | 1,30  | 7,41E-03 | -1,17 | 9,71E-02 | 1,12  | 3,14E-01 | 8,54  | 4,84E-03 | 19 | <i>GZMM</i>      | granzyme M (lymphocyte met-ase 1)                                            |
| 8176163 | 1,16  | 7,80E-02 | -1,12 | 1,15E-01 | 1,03  | 7,73E-01 | 8,44  | 4,41E-02 | X  | <i>GAB3</i>      | GRB2-associated binding protein 3                                            |
| 8137865 | 1,05  | 8,78E-01 | -1,26 | 2,44E-02 | -1,20 | 9,11E-02 | 8,55  | 3,03E-02 | 7  | <i>GNA12</i>     | guanine nucleotide binding protein (G protein) alpha 12                      |
| 7974341 | 1,18  | 6,60E-02 | -1,01 | 9,05E-01 | 1,17  | 5,39E-02 | 9,50  | 2,68E-02 | 14 | <i>GNG2</i>      | guanine nucleotide binding protein (G protein), gamma 2                      |
| 8046515 | -1,05 | 6,16E-01 | 1,13  | 1,18E-02 | 1,08  | 1,65E-01 | 12,05 | 1,54E-02 | 1  | <i>H3F3A</i>     | H3 histone, family 3A                                                        |
| 7905733 | 1,01  | 9,73E-01 | -1,24 | 1,27E-02 | -1,22 | 1,45E-02 | 7,43  | 7,37E-03 | 1  | <i>HAX1</i>      | HCLS1 associated protein X-1                                                 |
| 7915659 | 1,09  | 4,98E-01 | -1,17 | 2,49E-02 | -1,07 | 4,37E-01 | 8,25  | 4,04E-02 | 1  | <i>HECTD3</i>    | HECT domain containing 3                                                     |
| 8090193 | 1,29  | 3,58E-02 | -1,30 | 1,60E-02 | -1,01 | 9,78E-01 | 7,59  | 7,71E-03 | 3  | <i>HEG1</i>      | HEG homolog 1 (zebrafish)                                                    |
| 8028104 | 1,29  | 2,38E-02 | -1,26 | 2,44E-02 | 1,02  | 9,16E-01 | 9,13  | 8,26E-03 | 19 | <i>HCST</i>      | hematopoietic cell signal transducer, DAP10                                  |
| 8115455 | 1,16  | 1,85E-01 | -1,18 | 4,97E-02 | -1,01 | 9,34E-01 | 4,98  | 4,78E-02 | 5  | <i>HAVCRI</i>    | hepatitis A virus cellular receptor 1                                        |
| 8119525 | 1,07  | 7,11E-01 | 1,12  | 1,86E-01 | 1,20  | 2,69E-02 | 5,41  | 4,59E-02 | 6  | <i>HCRP1</i>     | hepatocellular carcinoma-related HCRP1                                       |
| 8083282 | 1,01  | 9,84E-01 | -1,15 | 3,17E-02 | -1,14 | 4,18E-02 | 9,34  | 2,60E-02 | 3  | <i>HPS3</i>      | Hermansky-Pudlak syndrome 3                                                  |
| 7933192 | -1,03 | 8,90E-01 | 1,14  | 3,47E-02 | 1,11  | 1,15E-01 | 6,21  | 4,47E-02 | 10 | <i>HNRNPA3P1</i> | heterogeneous nuclear ribonucleoprotein A3 pseudogene 1                      |
| 8117377 | 1,17  | 2,44E-02 | -1,10 | 1,50E-01 | 1,07  | 4,49E-01 | 12,76 | 1,87E-02 | 6  | <i>HIST1H1E</i>  | histone cluster 1, H1e                                                       |
| 8124402 | -1,12 | 5,69E-01 | 1,28  | 1,99E-02 | 1,14  | 3,08E-01 | 4,29  | 3,21E-02 | 6  | <i>HIST1H1T</i>  | histone cluster 1, H1t                                                       |
| 8124531 | 1,10  | 4,45E-01 | -1,19 | 2,19E-02 | -1,08 | 4,44E-01 | 10,82 | 3,39E-02 | 6  | <i>HIST1H3I</i>  | histone cluster 1, H3i                                                       |
| 8145636 | 1,15  | 8,61E-02 | 1,00  | 9,72E-01 | 1,15  | 3,85E-02 | 7,69  | 2,68E-02 | 8  | <i>HMBOX1</i>    | homeobox containing 1                                                        |

|         |       |          |       |          |      |          |      |          |    |     |                                                                                                                  |
|---------|-------|----------|-------|----------|------|----------|------|----------|----|-----|------------------------------------------------------------------------------------------------------------------|
| 7919131 | 1,16  | 2,70E-01 | 1,14  | 1,63E-01 | 1,32 | 1,58E-03 | 6,58 | 4,33E-03 | 1  | --- | Ho mo sapiens cDNA clone IMA GE:4249212.                                                                         |
| 7907568 | 1,05  | 7,35E-01 | 1,09  | 1,81E-01 | 1,15 | 2,90E-02 | 4,33 | 4,92E-02 | 1  | --- | Ho mo sapiens cDNA clone IMA GE:5296077.                                                                         |
| 8020650 | 1,02  | 9,42E-01 | 1,22  | 3,62E-02 | 1,25 | 1,77E-02 | 5,43 | 1,78E-02 | 18 | --- | Ho mo sapiens cDNA clone MGC:21733 IMA GE:4517792, complete cds.                                                 |
| 7902848 | 1,18  | 4,05E-01 | 1,11  | 4,57E-01 | 1,31 | 2,95E-02 | 8,11 | 4,90E-02 | 1  | --- | Ho mo sapiens cDNA FLJ13538 fis, clone PLACE1006617.                                                             |
| 8063449 | -1,05 | 8,62E-01 | 1,21  | 3,39E-02 | 1,15 | 1,42E-01 | 6,68 | 4,68E-02 | 20 | --- | Ho mo sapiens cDNA FLJ14031 fis, clone HEMBA1004335.                                                             |
| 8061414 | -1,28 | 1,31E-01 | 1,37  | 1,55E-02 | 1,07 | 7,40E-01 | 6,04 | 1,47E-02 | 20 | --- | Ho mo sapiens cDNA FLJ33142 fis, clone UTERU1000192.                                                             |
| 7926894 | 1,12  | 4,75E-01 | 1,09  | 3,44E-01 | 1,22 | 2,25E-02 | 5,15 | 4,05E-02 | 10 | --- | Ho mo sapiens cDNA FLJ35060 fis, clone OCBBF2018828.                                                             |
| 8075190 | -1,03 | 8,71E-01 | 1,15  | 2,71E-02 | 1,11 | 1,08E-01 | 4,79 | 3,52E-02 | 22 | --- | Ho mo sapiens cDNA FLJ38169 fis, clone DFNES2008280.                                                             |
| 8093330 | 1,32  | 1,63E-01 | 1,06  | 7,51E-01 | 1,41 | 2,64E-02 | 6,88 | 2,92E-02 | 4  | --- | Ho mo sapiens cDNA FLJ38191 fis, clone FCBBF1000243. ///<br>Ho mo sapiens cDNA FLJ42172 fis, clone THYMU2029676. |
| 8101990 | 1,22  | 4,93E-01 | 1,58  | 6,22E-03 | 1,94 | 2,90E-05 | 5,80 | 1,10E-04 | 4  | --- | Ho mo sapiens cDNA FLJ39766 fis, clone SPLEN2000307.                                                             |
| 8144569 | 1,24  | 4,98E-01 | 1,20  | 3,20E-01 | 1,49 | 2,16E-02 | 4,84 | 3,95E-02 | 8  | --- | Ho mo sapiens cDNA FLJ42545 fis, clone BRACE3004783.                                                             |
| 7994570 | 1,16  | 4,91E-01 | 1,16  | 2,59E-01 | 1,35 | 1,36E-02 | 6,76 | 2,69E-02 | 16 | --- | Ho mo sapiens cDNA: FLJ23497 fis, clone LNG02604.                                                                |
| 8002102 | 1,15  | 5,05E-01 | 1,13  | 2,95E-01 | 1,30 | 1,88E-02 | 5,62 | 3,53E-02 | 16 | --- | Ho mo sapiens clone HQ0113 PRO0113 mRNA, complete cds.                                                           |
| 7935863 | 1,05  | 6,12E-01 | 1,11  | 3,56E-02 | 1,17 | 1,06E-03 | 3,59 | 2,57E-03 | 10 | --- | Ho mo sapiens clone HQ0483\$ PRO0483 mRNA, complete cds.                                                         |
| 8081254 | 1,13  | 2,96E-01 | 1,09  | 3,33E-01 | 1,23 | 8,29E-03 | 5,27 | 1,64E-02 | 3  | --- | Ho mo sapiens clone HQ0641 PRO0641 mRNA, complete cds.                                                           |
| 8020321 | 1,15  | 4,11E-01 | 1,17  | 1,38E-01 | 1,35 | 2,94E-03 | 5,67 | 7,10E-03 | 18 | --- | Ho mo sapiens clone HQ0644 PRO0644 mRNA, complete cds.                                                           |
| 8089295 | 1,32  | 4,23E-02 | -1,03 | 8,69E-01 | 1,29 | 4,33E-02 | 6,83 | 1,86E-02 | 3  | --- | Ho mo sapiens HC1 (HC1) mRNA, complete cds.                                                                      |
| 8165932 | 1,02  | 9,61E-01 | 1,29  | 3,05E-02 | 1,31 | 1,88E-02 | 3,81 | 1,67E-02 | X  | --- | Ho mo sapiens HCV-NS5A TP5 binding protein 1 mRNA, complete cds.                                                 |
| 8055016 | 1,08  | 8,41E-01 | 1,43  | 1,47E-02 | 1,55 | 1,55E-03 | 7,43 | 2,45E-03 | 2  | --- | Ho mo sapiens IL-1beta-regulated neutrophil survival protein mRNA, complete cds.                                 |
| 8005829 | 1,45  | 1,34E-01 | 1,49  | 4,28E-02 | 2,16 | 4,10E-05 | 5,33 | 1,68E-04 | 17 | --- | Ho mo sapiens lung squamous cell carcinoma related protein-2 mRNA, complete cds.                                 |
| 7975457 | 1,21  | 3,60E-01 | 1,30  | 4,92E-02 | 1,58 | 3,67E-04 | 8,04 | 1,24E-03 | 14 | --- | Ho mo sapiens mRNA for FLJ00399 protein.                                                                         |
| 8168727 | 1,17  | 1,25E-01 | 1,10  | 2,50E-01 | 1,29 | 1,09E-03 | 4,67 | 2,78E-03 | X  | --- | Ho mo sapiens mRNA for HEIL2, complete cds.                                                                      |

|         |       |          |       |          |       |          |      |          |    |                      |                                                                                        |
|---------|-------|----------|-------|----------|-------|----------|------|----------|----|----------------------|----------------------------------------------------------------------------------------|
| 7958207 | 1,41  | 1,44E-01 | 1,36  | 1,00E-01 | 1,91  | 2,11E-04 | 7,13 | 7,68E-04 | 12 | ---                  | Homo sapiens mRNA similar to hypothetical protein FLJ21394 (cDNA clone IMAGE:3950761). |
| 8152865 | 1,13  | 7,31E-01 | 1,35  | 4,33E-02 | 1,52  | 3,08E-03 | 7,77 | 5,86E-03 | 8  | ---                  | Homo sapiens OK/SW-cl.41 mRNA, complete cds.                                           |
| 7939374 | 1,63  | 1,95E-02 | 1,20  | 3,77E-01 | 1,96  | 2,33E-04 | 6,69 | 5,07E-04 | 11 | ---                  | Homo sapiens PNAS-17 mRNA, complete cds.                                               |
| 7985266 | 1,09  | 7,45E-01 | 1,31  | 1,66E-02 | 1,44  | 8,58E-04 | 6,41 | 1,69E-03 | 15 | ---                  | Homo sapiens PP1200 mRNA, complete cds.                                                |
| 8132513 | 1,05  | 8,86E-01 | 1,28  | 4,69E-02 | 1,35  | 1,36E-02 | 5,38 | 1,75E-02 | 7  | ---                  | Homo sapiens uncharacterized gastric protein ZG12P mRNA, complete cds.                 |
| 7919787 | -1,09 | 8,79E-01 | 1,51  | 2,12E-02 | 1,39  | 7,58E-02 | 6,48 | 2,43E-02 | 1  | <i>HORMAD1</i>       | HORMA domain containing 1                                                              |
| 8175947 | 1,03  | 9,04E-01 | -1,17 | 2,39E-02 | -1,14 | 6,75E-02 | 8,50 | 2,61E-02 | X  | <i>HCFC1</i>         | host cell factor C1 (VP16-accessory protein)                                           |
| 8093685 | 1,16  | 2,38E-02 | -1,09 | 1,40E-01 | 1,06  | 4,61E-01 | 7,87 | 1,79E-02 | 4  | <i>HTT</i>           | huntingtin                                                                             |
| 8132245 | 1,03  | 8,92E-01 | 1,12  | 9,59E-02 | 1,15  | 3,89E-02 | 4,19 | 4,90E-02 | 7  | <i>FLJ20712</i>      | hypothetical FLJ20712                                                                  |
| 7961097 | 1,00  | 9,93E-01 | 1,19  | 1,66E-02 | 1,19  | 1,28E-02 | 5,76 | 8,54E-03 | 12 | <i>FLJ46363</i>      | hypothetical FLJ46363                                                                  |
| 7951140 | 1,23  | 5,22E-01 | 1,35  | 7,92E-02 | 1,66  | 2,06E-03 | 7,66 | 5,10E-03 | 11 | <i>UNQ6228</i>       | hypothetical LOC100131541                                                              |
| 8061483 | 1,17  | 4,37E-02 | -1,01 | 8,81E-01 | 1,15  | 4,30E-02 | 6,13 | 1,92E-02 | 20 | <i>CTD-2514C3.1</i>  | hypothetical LOC100134868                                                              |
| 8148982 | 1,12  | 6,11E-01 | 1,18  | 1,47E-01 | 1,32  | 9,92E-03 | 6,56 | 1,99E-02 | 8  | <i>LOC389607</i>     | hypothetical LOC389607                                                                 |
| 8023868 | -1,18 | 3,88E-02 | 1,07  | 3,95E-01 | -1,10 | 2,34E-01 | 5,97 | 3,10E-02 | 18 | <i>LOC400657</i>     | hypothetical LOC400657                                                                 |
| 8084739 | 1,10  | 5,00E-01 | 1,12  | 1,40E-01 | 1,23  | 4,81E-03 | 5,86 | 1,09E-02 | 3  | <i>FLJ42393</i>      | hypothetical LOC401105                                                                 |
| 8135931 | -1,12 | 5,49E-01 | 1,28  | 1,28E-02 | 1,15  | 2,34E-01 | 7,71 | 1,87E-02 | 7  | <i>tcag7.907</i>     | hypothetical LOC402483                                                                 |
| 7976828 | -1,05 | 7,69E-01 | 1,17  | 1,74E-02 | 1,11  | 1,32E-01 | 5,44 | 2,53E-02 | 14 | <i>FLJ41170</i>      | hypothetical LOC440200                                                                 |
| 7919596 | 1,12  | 6,68E-01 | 1,17  | 2,11E-01 | 1,32  | 2,39E-02 | 5,19 | 4,29E-02 | 1  | <i>LOC440570</i>     | hypothetical LOC440570                                                                 |
| 7912194 | 1,14  | 6,49E-01 | 1,35  | 2,44E-02 | 1,54  | 7,28E-04 | 6,45 | 1,72E-03 | 1  | <i>DKFZp566H0824</i> | hypothetical LOC54744                                                                  |
| 8137483 | 1,18  | 2,16E-01 | 1,10  | 3,54E-01 | 1,30  | 5,37E-03 | 5,63 | 1,07E-02 | 7  | <i>FLJ16734</i>      | hypothetical LOC641928                                                                 |
| 8159732 | 1,06  | 7,52E-01 | 1,14  | 7,69E-02 | 1,20  | 8,86E-03 | 7,12 | 1,56E-02 | 9  | <i>FLJ40292</i>      | hypothetical LOC643210                                                                 |
| 8111922 | -1,01 | 9,38E-01 | -1,15 | 1,40E-02 | -1,16 | 4,35E-03 | 7,16 | 4,16E-03 | 5  | <i>LOC648987</i>     | hypothetical LOC648987                                                                 |
| 8113071 | -1,03 | 8,90E-01 | 1,19  | 1,18E-02 | 1,16  | 3,19E-02 | 7,56 | 9,53E-03 | 5  | <i>LOC729040</i>     | hypothetical LOC729040                                                                 |

|         |       |          |       |          |       |          |       |          |    |                     |                                                                                                       |
|---------|-------|----------|-------|----------|-------|----------|-------|----------|----|---------------------|-------------------------------------------------------------------------------------------------------|
| 7985431 | 1,14  | 8,09E-01 | -1,63 | 1,66E-02 | -1,43 | 1,00E-01 | 6,53  | 2,25E-02 | 15 | <i>LOC80154</i>     | hypothetical LOC80154                                                                                 |
| 8008700 | 1,02  | 9,24E-01 | 1,15  | 2,93E-02 | 1,17  | 1,12E-02 | 5,52  | 1,17E-02 | 17 | <i>FLJ11710</i>     | hypothetical protein FLJ11710                                                                         |
| 8017344 | 1,17  | 1,86E-01 | 1,02  | 8,44E-01 | 1,20  | 4,46E-02 | 7,02  | 4,48E-02 | 17 | <i>LOC100129112</i> | hypothetical protein LOC100129112                                                                     |
| 7971965 | 1,04  | 9,08E-01 | 1,20  | 6,33E-02 | 1,24  | 2,76E-02 | 5,38  | 3,21E-02 | 13 | <i>LOC100129884</i> | hypothetical protein LOC100129884                                                                     |
| 8105189 | 1,02  | 9,56E-01 | 1,21  | 5,12E-02 | 1,23  | 3,32E-02 | 4,81  | 3,28E-02 | 5  | <i>LOC100287671</i> | hypothetical protein LOC100287671                                                                     |
| 7978917 | 1,09  | 5,78E-01 | 1,11  | 1,84E-01 | 1,22  | 1,20E-02 | 6,04  | 2,36E-02 | 14 | <i>LOC196913</i>    | hypothetical protein LOC196913                                                                        |
| 8063793 | 1,14  | 5,69E-01 | 1,15  | 2,70E-01 | 1,30  | 2,24E-02 | 5,64  | 4,12E-02 | 20 | <i>LOC284757</i>    | hypothetical protein LOC284757                                                                        |
| 7957242 | -1,03 | 9,01E-01 | -1,15 | 5,71E-02 | -1,19 | 2,22E-02 | 8,46  | 2,64E-02 | 12 | <i>LOC552889</i>    | hypothetical protein LOC552889                                                                        |
| 7952145 | 1,11  | 2,95E-01 | -1,15 | 3,76E-02 | -1,04 | 7,46E-01 | 7,60  | 4,96E-02 | 11 | <i>HYOUI</i>        | hypoxia up-regulated 1                                                                                |
| 7936826 | -1,16 | 3,03E-01 | -1,06 | 5,89E-01 | -1,23 | 3,15E-02 | 8,34  | 4,59E-02 | 10 | <i>IKZF5</i>        | IKAROS family zinc finger 5 (Pegasus)                                                                 |
| 7981737 | -1,22 | 6,27E-01 | -1,28 | 2,31E-01 | -1,57 | 2,24E-02 | 7,14  | 4,09E-02 | 14 | <i>IGHA1</i>        | immunoglobulin heavy constant alpha 1                                                                 |
| 8071658 | -1,26 | 3,14E-01 | -1,10 | 5,88E-01 | -1,39 | 3,29E-02 | 5,39  | 4,83E-02 | 22 | <i>IGLV7-46</i>     | immunoglobulin lambda variable 7-46 (gene/pseudogene)                                                 |
| 8045171 | 1,05  | 7,24E-01 | -1,17 | 8,65E-03 | -1,11 | 6,85E-02 | 8,08  | 8,53E-03 | 2  | <i>IMP4</i>         | IMP4, U3 small nucleolar ribonucleoprotein, homolog (yeast)                                           |
| 7900888 | 1,12  | 1,14E-01 | -1,13 | 3,39E-02 | -1,01 | 9,40E-01 | 6,62  | 2,67E-02 | 1  | <i>IPO13</i>        | importin 13                                                                                           |
| 7978132 | 1,07  | 4,87E-01 | -1,12 | 2,93E-02 | -1,05 | 4,85E-01 | 7,18  | 4,77E-02 | 14 | <i>IPO4</i>         | importin 4                                                                                            |
| 8118734 | 1,18  | 1,36E-01 | -1,18 | 5,27E-02 | -1,00 | 9,86E-01 | 7,64  | 4,24E-02 | 6  | <i>ITPR3</i>        | inositol 1,4,5-triphosphate receptor, type 3                                                          |
| 8043791 | 1,16  | 5,60E-03 | -1,06 | 2,57E-01 | 1,09  | 9,70E-02 | 9,28  | 4,16E-03 | 2  | <i>INPP4A</i>       | inositol polyphosphate-4-phosphatase, type I, 107kDa                                                  |
| 8011062 | 1,06  | 6,69E-01 | -1,15 | 2,95E-02 | -1,08 | 3,08E-01 | 8,75  | 4,96E-02 | 17 | <i>INPP5K</i>       | inositol polyphosphate-5-phosphatase K                                                                |
| 8059470 | -1,09 | 4,96E-01 | -1,10 | 1,98E-01 | -1,19 | 8,69E-03 | 5,62  | 1,80E-02 | 2  | <i>IRS1</i>         | insulin receptor substrate 1                                                                          |
| 7986383 | -1,26 | 3,88E-02 | 1,36  | 3,68E-03 | 1,08  | 6,17E-01 | 7,20  | 2,09E-03 | 15 | <i>IGF1R</i>        | insulin-like growth factor 1 receptor                                                                 |
| 8102162 | -1,02 | 8,98E-01 | -1,15 | 1,17E-02 | -1,17 | 1,77E-03 | 6,22  | 2,17E-03 | 4  | <i>INTS12</i>       | integrator complex subunit 12                                                                         |
| 8150014 | 1,12  | 2,57E-01 | -1,20 | 1,27E-02 | -1,07 | 4,94E-01 | 7,64  | 1,57E-02 | 8  | <i>INTS9</i>        | integrator complex subunit 9                                                                          |
| 7994826 | 1,16  | 9,08E-02 | -1,15 | 4,76E-02 | 1,00  | 9,85E-01 | 10,51 | 3,08E-02 | 16 | <i>ITGAL</i>        | integrin, alpha L (antigen CD11A (p180), lymphocyte function-associated antigen 1; alpha polypeptide) |



|         |       |          |       |          |       |          |       |          |    |                |                                                                           |
|---------|-------|----------|-------|----------|-------|----------|-------|----------|----|----------------|---------------------------------------------------------------------------|
| 7963614 | 1,19  | 1,34E-01 | -1,24 | 2,12E-02 | -1,04 | 8,17E-01 | 9,68  | 1,99E-02 | 12 | <i>ITGB7</i>   | integrin, beta 7                                                          |
| 8017547 | 1,22  | 2,08E-02 | -1,12 | 1,40E-01 | 1,08  | 4,35E-01 | 9,76  | 1,56E-02 | 17 | <i>ICAM2</i>   | intercellular adhesion molecule 2                                         |
| 7925161 | -1,13 | 2,08E-01 | -1,03 | 7,34E-01 | -1,16 | 3,35E-02 | 9,41  | 3,98E-02 | 1  | <i>IRF2BP2</i> | interferon regulatory factor 2 binding protein 2                          |
| 7921110 | 1,02  | 9,24E-01 | -1,16 | 1,47E-02 | -1,14 | 3,13E-02 | 8,76  | 1,21E-02 | 1  | <i>ISG20L2</i> | interferon stimulated exonuclease gene 20kDa-like 2                       |
| 7944152 | 1,16  | 6,60E-02 | -1,19 | 1,27E-02 | -1,03 | 8,39E-01 | 10,50 | 8,75E-03 | 11 | <i>IL10RA</i>  | interleukin 10 receptor, alpha                                            |
| 8035380 | 1,16  | 3,88E-02 | -1,18 | 1,27E-02 | -1,01 | 9,14E-01 | 8,09  | 6,90E-03 | 19 | <i>IL12RB1</i> | interleukin 12 receptor, beta 1                                           |
| 7902205 | 1,45  | 2,38E-02 | -1,18 | 3,07E-01 | 1,23  | 2,29E-01 | 6,51  | 1,91E-02 | 1  | <i>IL12RB2</i> | interleukin 12 receptor, beta 2                                           |
| 8097553 | 1,14  | 3,26E-01 | 1,08  | 4,50E-01 | 1,23  | 1,89E-02 | 5,19  | 3,29E-02 | 4  | <i>IL15</i>    | interleukin 15                                                            |
| 8075886 | 1,58  | 1,46E-02 | -1,29 | 1,47E-01 | 1,22  | 3,50E-01 | 9,91  | 1,14E-02 | 22 | <i>IL2RB</i>   | interleukin 2 receptor, beta                                              |
| 7994292 | 1,15  | 1,31E-01 | -1,17 | 2,98E-02 | -1,02 | 8,99E-01 | 7,34  | 2,64E-02 | 16 | <i>IL21R</i>   | interleukin 21 receptor                                                   |
| 7960559 | 1,14  | 3,45E-02 | -1,03 | 6,87E-01 | 1,11  | 7,06E-02 | 7,21  | 1,89E-02 | 12 | <i>IFFO1</i>   | intermediate filament family orphan 1                                     |
| 7975705 | -1,04 | 7,45E-01 | -1,09 | 5,17E-02 | -1,13 | 4,63E-03 | 8,06  | 8,52E-03 | 14 | <i>ISCA2</i>   | iron-sulfur cluster assembly 2 homolog ( <i>S. cerevisiae</i> )           |
| 7991374 | 1,08  | 5,44E-01 | -1,17 | 2,51E-02 | -1,08 | 3,92E-01 | 8,63  | 4,13E-02 | 15 | <i>IDH2</i>    | isocitrate dehydrogenase 2 (NADP+), mitochondrial                         |
| 7985134 | -1,04 | 8,90E-01 | -1,20 | 2,84E-02 | -1,25 | 7,54E-03 | 9,39  | 8,58E-03 | 15 | <i>IDH3A</i>   | isocitrate dehydrogenase 3 (NAD+) alpha                                   |
| 8064522 | 1,05  | 7,52E-01 | -1,14 | 2,38E-02 | -1,09 | 1,86E-01 | 8,65  | 3,55E-02 | 20 | <i>IDH3B</i>   | isocitrate dehydrogenase 3 (NAD+) beta                                    |
| 7911993 | 1,09  | 3,45E-01 | -1,17 | 7,68E-03 | -1,08 | 2,75E-01 | 7,30  | 8,75E-03 | 1  | <i>ICMT</i>    | isoprenylcysteine carboxyl methyltransferase                              |
| 8114938 | 1,39  | 5,81E-02 | -1,12 | 5,14E-01 | 1,24  | 2,07E-01 | 5,75  | 4,18E-02 | 5  | <i>JAKMIP2</i> | janus kinase and microtubule interacting protein 2                        |
| 7998267 | 1,07  | 5,48E-01 | -1,18 | 7,12E-03 | -1,10 | 1,35E-01 | 8,25  | 8,26E-03 | 16 | <i>JMJD8</i>   | ju monji domain containing 8                                              |
| 8038683 | 1,02  | 8,90E-01 | 1,10  | 9,65E-02 | 1,13  | 3,83E-02 | 5,40  | 4,89E-02 | 19 | <i>KLK6</i>    | kallikrein-related peptidase 6                                            |
| 8019737 | -1,03 | 8,92E-01 | -1,15 | 7,06E-02 | -1,19 | 2,69E-02 | 8,44  | 3,33E-02 | 17 | <i>KPNA2</i>   | karyopherin alpha 2 (RAG cohort 1, importin alpha 1)                      |
| 8038078 | -1,00 | 9,96E-01 | -1,17 | 1,74E-02 | -1,17 | 1,52E-02 | 8,08  | 1,01E-02 | 19 | <i>KDELRL1</i> | KDEL (Lys-Asp-Glu-Leu) endoplasmic reticulum protein retention receptor 1 |
| 8138108 | 1,01  | 9,85E-01 | -1,15 | 3,30E-02 | -1,15 | 4,27E-02 | 9,14  | 2,68E-02 | 7  | <i>KDELRL2</i> | KDEL (Lys-Asp-Glu-Leu) endoplasmic reticulum protein retention receptor 2 |
| 8119648 | 1,04  | 8,48E-01 | -1,18 | 1,22E-02 | -1,14 | 5,03E-02 | 9,19  | 1,21E-02 | 6  | <i>KLHDC3</i>  | kelch domain containing 3                                                 |

|         |       |          |       |          |       |          |      |          |    |                 |                                                                                 |
|---------|-------|----------|-------|----------|-------|----------|------|----------|----|-----------------|---------------------------------------------------------------------------------|
| 8003283 | 1,16  | 5,68E-02 | -1,04 | 6,10E-01 | 1,12  | 1,48E-01 | 6,79 | 3,67E-02 | 16 | <i>KLHDC4</i>   | kelch domain containing 4                                                       |
| 8098177 | -1,24 | 2,22E-01 | 1,31  | 3,70E-02 | 1,05  | 8,33E-01 | 7,54 | 4,16E-02 | 4  | <i>KLHL2</i>    | kelch-like 2, Mayven (Drosophila)                                               |
| 7991173 | -1,00 | 9,95E-01 | 1,13  | 3,96E-02 | 1,13  | 4,59E-02 | 5,91 | 3,30E-02 | 15 | <i>KLHL25</i>   | kelch-like 25 (Drosophila)                                                      |
| 8154725 | 1,17  | 1,97E-01 | 1,03  | 7,96E-01 | 1,21  | 4,12E-02 | 6,98 | 4,41E-02 | 12 | <i>KRT18</i>    | keratin 18                                                                      |
| 7963427 | 1,22  | 5,24E-02 | -1,02 | 8,63E-01 | 1,20  | 5,40E-02 | 5,87 | 2,39E-02 | 12 | <i>KRT5</i>     | keratin 5                                                                       |
| 7963459 | 1,34  | 1,03E-02 | -1,22 | 6,15E-02 | 1,10  | 5,14E-01 | 6,04 | 6,38E-03 | 12 | <i>KRT72</i>    | keratin 72                                                                      |
| 7963471 | 1,57  | 4,30E-03 | -1,41 | 1,95E-02 | 1,11  | 6,47E-01 | 5,42 | 1,89E-03 | 12 | <i>KRT73</i>    | keratin 73                                                                      |
| 7963359 | -1,03 | 8,87E-01 | 1,18  | 2,19E-02 | 1,15  | 7,23E-02 | 5,73 | 2,48E-02 | 12 | <i>KRT83</i>    | keratin 83                                                                      |
| 8093230 | 1,12  | 9,39E-02 | -1,10 | 1,02E-01 | 1,02  | 8,47E-01 | 8,39 | 4,83E-02 | 3  | <i>KIAA0226</i> | KIAA0226                                                                        |
| 7915882 | 1,03  | 8,65E-01 | -1,13 | 2,67E-02 | -1,10 | 1,11E-01 | 9,70 | 3,49E-02 | 1  | <i>KIAA0494</i> | KIAA0494                                                                        |
| 8097148 | 1,01  | 9,76E-01 | 1,12  | 5,27E-02 | 1,13  | 4,47E-02 | 9,42 | 3,94E-02 | 4  | <i>KIAA1109</i> | KIAA1109                                                                        |
| 8021496 | 1,07  | 6,80E-01 | 1,09  | 2,27E-01 | 1,17  | 2,88E-02 | 8,81 | 4,99E-02 | 18 | <i>KIAA1468</i> | KIAA1468                                                                        |
| 8121525 | 1,18  | 1,81E-01 | 1,02  | 8,76E-01 | 1,20  | 5,08E-02 | 7,55 | 4,77E-02 | 6  | <i>KIAA1919</i> | KIAA1919                                                                        |
| 8031297 | 1,60  | 5,19E-02 | -1,21 | 4,25E-01 | 1,33  | 2,54E-01 | 6,91 | 3,95E-02 | 19 | <i>KIR2DL1</i>  | killer cell immunoglobulin-like receptor, two domains, long cytoplasmic tail, 1 |
| 8039829 | 1,84  | 3,71E-02 | -1,42 | 1,94E-01 | 1,30  | 4,50E-01 | 7,66 | 2,76E-02 | 19 | <i>KIR2DL2</i>  | killer cell immunoglobulin-like receptor, two domains, long cytoplasmic tail, 2 |
| 7961059 | 1,50  | 2,06E-02 | -1,42 | 2,87E-02 | 1,06  | 8,59E-01 | 9,41 | 8,09E-03 | 12 | <i>KLRB1</i>    | killer cell lectin-like receptor subfamily B, member 1                          |
| 7953949 | 1,54  | 3,78E-02 | -1,22 | 3,17E-01 | 1,27  | 2,87E-01 | 9,26 | 2,89E-02 | 12 | <i>KLRD1</i>    | killer cell lectin-like receptor subfamily D, member 1 (CD94)                   |
| 7953892 | 2,08  | 1,46E-02 | -1,34 | 3,17E-01 | 1,55  | 1,54E-01 | 8,65 | 1,12E-02 | 12 | <i>KLRF1</i>    | killer cell lectin-like receptor subfamily F, member 1                          |
| 7953835 | 1,58  | 4,11E-02 | -1,22 | 3,68E-01 | 1,30  | 2,65E-01 | 9,70 | 3,31E-02 | 12 | <i>KLRG1</i>    | killer cell lectin-like receptor subfamily G, member 1                          |
| 8150036 | 1,16  | 4,51E-02 | -1,02 | 8,28E-01 | 1,14  | 5,48E-02 | 7,51 | 2,19E-02 | 8  | <i>KIF13B</i>   | kinesin family member 13B                                                       |
| 7962274 | 1,28  | 3,05E-02 | -1,10 | 3,81E-01 | 1,16  | 2,01E-01 | 5,37 | 2,32E-02 | 12 | <i>KIF21A</i>   | kinesin family member 21A                                                       |
| 7991296 | -1,07 | 6,09E-01 | 1,16  | 1,27E-02 | 1,09  | 1,91E-01 | 6,05 | 1,80E-02 | 15 | <i>KIF7</i>     | kinesin family member 7                                                         |
| 7982326 | -1,04 | 8,20E-01 | -1,09 | 1,25E-01 | -1,13 | 3,08E-02 | 9,45 | 4,65E-02 | 15 | <i>KLF13</i>    | Kruppel-like factor 13                                                          |

|         |       |          |       |          |       |          |      |          |    |                |                                                                 |
|---------|-------|----------|-------|----------|-------|----------|------|----------|----|----------------|-----------------------------------------------------------------|
| 8163002 | -1,39 | 3,02E-02 | -1,02 | 9,30E-01 | -1,41 | 9,73E-03 | 7,38 | 6,52E-03 | 9  | <i>KLF4</i>    | Kruppel-like factor 4 (gut)                                     |
| 7969414 | -1,16 | 1,35E-01 | -1,01 | 9,41E-01 | -1,17 | 5,12E-02 | 7,49 | 4,09E-02 | 13 | <i>KLF5</i>    | Kruppel-like factor 5 (intestinal)                              |
| 7931810 | -1,18 | 3,88E-02 | 1,06  | 4,88E-01 | -1,11 | 1,72E-01 | 9,22 | 2,92E-02 | 10 | <i>KLF6</i>    | Kruppel-like factor 6                                           |
| 7916130 | -1,02 | 9,41E-01 | -1,22 | 1,03E-02 | -1,24 | 2,48E-03 | 7,99 | 2,52E-03 | 1  | <i>KTI12</i>   | KTI12 homolog, chromatin associated ( <i>S. cerevisiae</i> )    |
| 8109438 | -1,05 | 6,95E-01 | -1,09 | 9,16E-02 | -1,15 | 7,62E-03 | 9,28 | 1,45E-02 | 5  | <i>LARPI</i>   | La ribonucleoprotein domain family, member 1                    |
| 7910096 | 1,01  | 9,67E-01 | 1,15  | 5,11E-02 | 1,17  | 3,96E-02 | 4,80 | 3,53E-02 | 1  | <i>LBR</i>     | lamin B receptor                                                |
| 8034783 | 1,07  | 4,63E-01 | -1,14 | 1,85E-02 | -1,06 | 3,95E-01 | 7,54 | 2,95E-02 | 19 | <i>LPHN1</i>   | latrophilin 1                                                   |
| 7994237 | 1,04  | 7,31E-01 | -1,14 | 1,11E-02 | -1,09 | 8,90E-02 | 7,70 | 1,24E-02 | 16 | <i>LCMT1</i>   | leucine carboxyl methyltransferase 1                            |
| 8049536 | 1,01  | 9,85E-01 | 1,16  | 5,36E-02 | 1,17  | 5,12E-02 | 8,81 | 4,33E-02 | 2  | <i>LRRFIP1</i> | leucine rich repeat (in FLII) interacting protein 1             |
| 8049530 | 1,10  | 8,59E-01 | 1,48  | 3,70E-02 | 1,63  | 7,61E-03 | 8,71 | 1,01E-02 | 2  | <i>LRRFIP1</i> | leucine rich repeat (in FLII) interacting protein 1             |
| 8049532 | -1,05 | 9,32E-01 | 1,42  | 3,30E-02 | 1,35  | 7,58E-02 | 7,07 | 3,53E-02 | 2  | <i>LRRFIP1</i> | leucine rich repeat (in FLII) interacting protein 1             |
| 7933484 | 1,04  | 8,29E-01 | 1,16  | 3,90E-02 | 1,21  | 6,63E-03 | 4,62 | 9,16E-03 | 10 | <i>LRRC18</i>  | leucine rich repeat containing 18                               |
| 7986394 | 1,07  | 7,00E-01 | -1,18 | 2,35E-02 | -1,11 | 2,33E-01 | 8,06 | 3,69E-02 | 15 | <i>LRRC28</i>  | leucine rich repeat containing 28                               |
| 7915827 | 1,04  | 7,75E-01 | -1,17 | 7,12E-03 | -1,12 | 4,38E-02 | 8,20 | 6,52E-03 | 1  | <i>LRRC41</i>  | leucine rich repeat containing 41                               |
| 8137215 | 1,08  | 3,81E-01 | -1,15 | 1,16E-02 | -1,07 | 3,23E-01 | 7,41 | 1,44E-02 | 7  | <i>LRRC61</i>  | leucine rich repeat containing 61                               |
| 8098924 | 1,07  | 5,34E-01 | -1,14 | 1,74E-02 | -1,07 | 3,14E-01 | 7,35 | 2,78E-02 | 4  | <i>LETM1</i>   | leucine zipper-EF-hand containing transmembrane protein 1       |
| 7908816 | 1,44  | 5,19E-03 | -1,22 | 1,13E-01 | 1,18  | 2,38E-01 | 6,22 | 3,82E-03 | 1  | <i>LGR6</i>    | leucine-rich repeat-containing G protein-coupled receptor 6     |
| 8136315 | 1,15  | 5,29E-02 | -1,09 | 1,96E-01 | 1,06  | 5,32E-01 | 4,15 | 3,95E-02 | 7  | <i>LRGUK</i>   | leucine-rich repeats and guanylate kinase domain containing     |
| 8071466 | 1,13  | 4,32E-02 | -1,08 | 1,88E-01 | 1,05  | 5,03E-01 | 7,37 | 3,35E-02 | 22 | <i>LZTR1</i>   | leucine-zipper-like transcription regulator 1                   |
| 8039257 | 1,17  | 2,27E-01 | -1,22 | 3,02E-02 | -1,05 | 7,76E-01 | 9,02 | 3,53E-02 | 19 | <i>LAIR1</i>   | leukocyte-associated immunoglobulin-like receptor 1             |
| 8084742 | 1,20  | 2,67E-02 | 1,05  | 5,84E-01 | 1,26  | 1,30E-03 | 9,14 | 1,89E-03 | 3  | <i>LPP</i>     | LIM domain containing preferred translocation partner in lipoma |
| 7994541 | 1,14  | 3,80E-01 | -1,23 | 3,01E-02 | -1,07 | 5,96E-01 | 9,49 | 4,52E-02 | 16 | <i>LAT</i>     | linker for activation of T cells                                |
| 8130598 | 1,38  | 2,97E-02 | -1,14 | 3,67E-01 | 1,21  | 2,07E-01 | 5,86 | 2,25E-02 | 6  | <i>LPAL2</i>   | lipoprotein, Lp(a)-like 2 pseudogene                            |

|         |       |          |       |          |       |          |       |          |    |                 |                                                              |
|---------|-------|----------|-------|----------|-------|----------|-------|----------|----|-----------------|--------------------------------------------------------------|
| 7904742 | 1,03  | 8,05E-01 | -1,11 | 2,70E-02 | -1,08 | 1,61E-01 | 8,82  | 3,97E-02 | 1  | <i>LIX1L</i>    | Lix1 homolog (mouse)-like                                    |
| 8085429 | 1,06  | 7,05E-01 | 1,14  | 5,31E-02 | 1,21  | 3,67E-03 | 6,80  | 7,10E-03 | 3  | <i>UNQ6487</i>  | LMNE6487                                                     |
| 8150206 | -1,03 | 8,90E-01 | -1,14 | 5,42E-02 | -1,18 | 1,87E-02 | 10,32 | 2,32E-02 | 17 | <i>LSM12</i>    | LSM12 homolog ( <i>S. cerevisiae</i> )                       |
| 8037061 | -1,08 | 5,80E-01 | 1,17  | 2,32E-02 | 1,09  | 3,35E-01 | 4,88  | 3,76E-02 | 19 | <i>LYPD4</i>    | LY6/PLAUR domain containing 4                                |
| 7941769 | -1,10 | 5,87E-02 | 1,03  | 5,78E-01 | -1,07 | 1,69E-01 | 9,55  | 3,98E-02 | 11 | <i>KDM2A</i>    | lysine (K)-specific demethylase 2A                           |
| 8154333 | 1,19  | 4,70E-02 | -1,08 | 3,74E-01 | 1,10  | 2,81E-01 | 8,54  | 3,69E-02 | 9  | <i>KDM4C</i>    | lysine (K)-specific demethylase 4C                           |
| 8110841 | 1,23  | 7,80E-02 | -1,05 | 6,80E-01 | 1,17  | 1,48E-01 | 9,18  | 4,63E-02 | 5  | <i>LPCAT1</i>   | lysophosphatidylcholine acyltransferase 1                    |
| 8148737 | 1,09  | 5,39E-01 | -1,22 | 1,11E-02 | -1,12 | 1,97E-01 | 8,25  | 1,40E-02 | 8  | <i>MAF1</i>     | MAF1 homolog ( <i>S. cerevisiae</i> )                        |
| 7955729 | 1,06  | 6,97E-01 | -1,18 | 1,84E-02 | -1,11 | 1,98E-01 | 7,37  | 2,86E-02 | 12 | <i>MFSD5</i>    | major facilitator superfamily domain containing 5            |
| 8180086 | -1,03 | 9,08E-01 | -1,15 | 7,41E-02 | -1,18 | 3,26E-02 | 9,73  | 3,88E-02 | 6  | <i>HLA-DMA</i>  | major histocompatibility complex, class II, DM alpha         |
| 8180100 | -1,04 | 8,96E-01 | -1,22 | 2,78E-02 | -1,27 | 7,64E-03 | 12,15 | 8,54E-03 | 6  | <i>HLA-DPA1</i> | major histocompatibility complex, class II, DP alpha 1       |
| 8178891 | 1,00  | 9,94E-01 | -1,25 | 2,42E-02 | -1,25 | 2,67E-02 | 11,96 | 1,71E-02 | 6  | <i>HLA-DPA1</i> | major histocompatibility complex, class II, DP alpha 1       |
| 8133690 | 1,02  | 8,97E-01 | -1,13 | 3,56E-02 | -1,10 | 1,12E-01 | 10,03 | 4,51E-02 | 7  | <i>MDH2</i>     | malate dehydrogenase 2, NAD (mitochondrial)                  |
| 8053158 | 1,10  | 2,02E-01 | -1,13 | 3,40E-02 | -1,02 | 8,32E-01 | 7,98  | 3,67E-02 | 2  | <i>MOGS</i>     | mannosyl-oligosaccharide glucosidase                         |
| 7939767 | 1,09  | 3,47E-01 | -1,13 | 3,23E-02 | -1,04 | 6,49E-01 | 9,34  | 4,61E-02 | 11 | <i>MADD</i>     | MAP-kinase activating death domain                           |
| 8180377 | 1,79  | 8,12E-02 | -1,67 | 6,88E-02 | 1,07  | 9,03E-01 | 7,12  | 3,53E-02 | 17 | <i>MXRA7</i>    | matrix-remodelling associated 7                              |
| 7912412 | 1,07  | 4,04E-01 | -1,13 | 1,71E-02 | -1,05 | 4,32E-01 | 8,31  | 2,64E-02 | 1  | <i>MTOR</i>     | mechanistic target of rapamycin (serine/threonine kinase)    |
| 8014925 | 1,09  | 2,08E-01 | -1,19 | 1,74E-03 | -1,08 | 1,61E-01 | 8,21  | 1,69E-03 | 17 | <i>MED24</i>    | mediator complex subunit 24                                  |
| 8032682 | 1,37  | 3,31E-02 | -1,20 | 1,83E-01 | 1,14  | 4,43E-01 | 7,26  | 2,44E-02 | 19 | <i>MATK</i>     | megakaryocyte-associated tyrosine kinase                     |
| 8076894 | 1,30  | 3,87E-02 | -1,17 | 1,70E-01 | 1,11  | 5,04E-01 | 7,97  | 2,83E-02 | 22 | <i>MLC1</i>     | megalencephalic leukoencephalopathy with subcortical cysts 1 |
| 8167815 | 1,16  | 8,12E-02 | -1,19 | 1,68E-02 | -1,02 | 8,71E-01 | 7,35  | 1,36E-02 | X  | <i>MAGED2</i>   | melanoma antigen family D, 2                                 |
| 8025421 | 1,08  | 7,69E-01 | -1,28 | 1,60E-02 | -1,19 | 1,17E-01 | 9,11  | 2,18E-02 | 19 | <i>MARCH2</i>   | membrane-associated ring finger (C3HC4) 2                    |
| 7948696 | 1,09  | 4,25E-01 | -1,17 | 1,28E-02 | -1,08 | 3,27E-01 | 9,70  | 1,83E-02 | 11 | <i>MTA2</i>     | metastasis associated 1 family, member 2                     |

|         |       |          |       |          |       |          |      |          |    |                                          |                                                        |
|---------|-------|----------|-------|----------|-------|----------|------|----------|----|------------------------------------------|--------------------------------------------------------|
| 7955441 | -1,05 | 8,68E-01 | -1,18 | 1,03E-01 | -1,24 | 3,27E-02 | 8,51 | 4,51E-02 | 12 | <i>METTL7A</i>                           | methyltransferase like 7A                              |
| 8060734 | -1,04 | 9,33E-01 | 1,38  | 2,57E-02 | 1,33  | 5,82E-02 | 5,18 | 2,63E-02 | 20 | <i>MIR103-2AS</i> ///<br><i>MIR103-2</i> | microRNA 103-2-as /// microRNA 103-2                   |
| 7903717 | -1,01 | 9,83E-01 | 1,26  | 1,11E-02 | 1,25  | 9,77E-03 | 7,76 | 4,91E-03 | 1  | <i>MIR197</i>                            | microRNA 197                                           |
| 7987097 | -1,04 | 8,77E-01 | 1,24  | 6,25E-03 | 1,20  | 1,70E-02 | 6,95 | 4,16E-03 | 15 | <i>MIR211</i>                            | microRNA 211                                           |
| 8164438 | 1,01  | 9,57E-01 | 1,12  | 5,01E-02 | 1,13  | 3,31E-02 | 5,14 | 3,22E-02 | 9  | <i>MIR219-2</i>                          | microRNA 219-2                                         |
| 8084755 | 1,12  | 3,34E-01 | 1,09  | 3,15E-01 | 1,22  | 9,12E-03 | 3,23 | 1,80E-02 | 3  | <i>MIR28</i>                             | microRNA 28                                            |
| 7923974 | 1,01  | 9,84E-01 | 1,40  | 4,01E-02 | 1,42  | 3,42E-02 | 6,62 | 2,76E-02 | 1  | <i>MIR29C</i>                            | microRNA 29c                                           |
| 8127498 | -1,10 | 7,03E-01 | 1,26  | 2,96E-02 | 1,15  | 2,75E-01 | 4,29 | 4,93E-02 | 6  | <i>MIR30C2</i>                           | microRNA 30c-2                                         |
| 8020419 | -1,01 | 9,57E-01 | 1,19  | 2,83E-02 | 1,17  | 5,03E-02 | 4,69 | 2,64E-02 | 18 | <i>MIR320C1</i>                          | microRNA 320c-1                                        |
| 8175261 | -1,13 | 3,24E-01 | 1,20  | 2,51E-02 | 1,06  | 6,08E-01 | 5,50 | 3,53E-02 | X  | <i>MIR503</i>                            | microRNA 503                                           |
| 8031029 | -1,13 | 1,87E-01 | -1,03 | 7,56E-01 | -1,16 | 3,22E-02 | 2,50 | 3,65E-02 | 19 | <i>MIR520B</i> ///<br><i>MIR520C</i>     | microRNA 520b /// microRNA 520c                        |
| 8156523 | -1,11 | 3,13E-01 | 1,16  | 3,62E-02 | 1,04  | 7,19E-01 | 6,36 | 4,92E-02 | 9  | <i>MIRLET7D</i>                          | microRNA let-7d                                        |
| 7963064 | 1,07  | 4,60E-01 | -1,15 | 1,56E-02 | -1,07 | 3,43E-01 | 7,79 | 2,32E-02 | 12 | <i>MCRS1</i>                             | microspherule protein 1                                |
| 7900235 | 1,19  | 4,32E-02 | -1,03 | 7,64E-01 | 1,16  | 6,82E-02 | 9,07 | 2,33E-02 | 1  | <i>MACF1</i>                             | microtubule-actin crosslinking factor 1                |
| 7900336 | 1,24  | 4,32E-02 | 1,04  | 7,26E-01 | 1,30  | 5,27E-03 | 6,27 | 5,51E-03 | 1  | <i>MACF1</i>                             | microtubule-actin crosslinking factor 1                |
| 8020878 | 1,11  | 1,74E-01 | -1,13 | 3,86E-02 | -1,02 | 8,99E-01 | 9,37 | 3,74E-02 | 18 | <i>MAPRE2</i>                            | microtubule-associated protein, RP/EB family, member 2 |
| 8018343 | 1,08  | 6,37E-01 | -1,23 | 5,76E-03 | -1,15 | 7,23E-02 | 7,35 | 5,41E-03 | 17 | <i>MIF4GD</i>                            | MIF4G domain containing                                |
| 7967987 | 1,01  | 9,82E-01 | -1,13 | 3,77E-02 | -1,13 | 5,33E-02 | 6,17 | 3,39E-02 | 13 | <i>MRP63</i>                             | mitochondrial ribosomal protein 63                     |
| 7901601 | -1,01 | 9,58E-01 | -1,12 | 3,00E-02 | -1,13 | 1,74E-02 | 9,10 | 1,56E-02 | 1  | <i>MRPL37</i>                            | mitochondrial ribosomal protein L37                    |
| 8071206 | 1,04  | 8,39E-01 | -1,15 | 1,99E-02 | -1,12 | 9,31E-02 | 6,98 | 2,52E-02 | 22 | <i>MRPL40</i>                            | mitochondrial ribosomal protein L40                    |
| 7941164 | 1,06  | 8,16E-01 | -1,29 | 7,81E-03 | -1,21 | 3,59E-02 | 7,92 | 6,52E-03 | 11 | <i>MRPL49</i>                            | mitochondrial ribosomal protein L49                    |
| 7920047 | 1,08  | 6,12E-01 | -1,18 | 2,02E-02 | -1,10 | 2,79E-01 | 8,49 | 3,29E-02 | 1  | <i>MRPL9</i>                             | mitochondrial ribosomal protein L9                     |
| 7934326 | 1,03  | 8,68E-01 | -1,16 | 1,18E-02 | -1,13 | 4,27E-02 | 8,40 | 1,11E-02 | 10 | <i>MRPS16</i>                            | mitochondrial ribosomal protein S16                    |

|         |       |          |       |          |       |          |       |          |    |                |                                                                                                         |
|---------|-------|----------|-------|----------|-------|----------|-------|----------|----|----------------|---------------------------------------------------------------------------------------------------------|
| 8063427 | -1,01 | 9,85E-01 | -1,21 | 5,01E-02 | -1,22 | 4,59E-02 | 6,30  | 3,85E-02 | 20 | <i>MOCS3</i>   | molybdenum cofactor synthesis 3                                                                         |
| 7904050 | 1,16  | 7,52E-02 | -1,20 | 1,18E-02 | -1,03 | 7,88E-01 | 8,18  | 8,53E-03 | 1  | <i>MOV10</i>   | Mov10, Moloney leukemia virus 10, homolog (mouse)                                                       |
| 8051066 | 1,03  | 9,14E-01 | -1,19 | 1,63E-02 | -1,16 | 4,12E-02 | 10,16 | 1,54E-02 | 2  | <i>MPV17</i>   | MpV17 mitochondrial inner membrane protein                                                              |
| 7926565 | -1,03 | 8,80E-01 | -1,11 | 5,38E-02 | -1,14 | 1,61E-02 | 8,43  | 2,10E-02 | 10 | <i>MLLT10</i>  | myeloid/lymphoid or mixed-lineage leukemia (trithorax homolog, <i>Drosophila</i> ); translocated to, 10 |
| 8139433 | 1,20  | 3,22E-02 | -1,20 | 1,71E-02 | 1,00  | 9,99E-01 | 9,41  | 7,84E-03 | 7  | <i>MYO1G</i>   | myosin IG                                                                                               |
| 7965812 | 1,29  | 5,69E-02 | -1,18 | 1,61E-01 | 1,09  | 6,08E-01 | 8,68  | 3,95E-02 | 12 | <i>GNPTAB</i>  | N-acetylglucosamine-1-phosphate transferase, alpha and beta subunits                                    |
| 7940824 | 1,20  | 4,93E-02 | -1,20 | 2,57E-02 | -1,00 | 9,99E-01 | 7,38  | 1,42E-02 | 11 | <i>NAT11</i>   | N-acetyltransferase 11 (GCN5-related, putative)                                                         |
| 8079772 | 1,06  | 6,88E-01 | -1,16 | 1,66E-02 | -1,10 | 1,91E-01 | 8,13  | 2,60E-02 | 3  | <i>APEH</i>    | N-acylaminoacyl-peptide hydrolase                                                                       |
| 8170590 | 1,08  | 4,77E-01 | -1,15 | 3,06E-02 | -1,06 | 5,03E-01 | 7,47  | 4,96E-02 | X  | <i>NSDHL</i>   | NAD(P) dependent steroid dehydrogenase-like                                                             |
| 8031097 | 1,14  | 1,18E-01 | -1,13 | 6,51E-02 | 1,01  | 9,59E-01 | 8,72  | 4,37E-02 | 19 | <i>NDUFA3</i>  | NADH dehydrogenase (ubiquinone) 1 alpha subcomplex, 3, 9kDa                                             |
| 8079707 | 1,13  | 3,66E-02 | -1,09 | 8,36E-02 | 1,03  | 7,03E-01 | 9,06  | 2,14E-02 | 3  | <i>NDUFAF3</i> | NADH dehydrogenase (ubiquinone) 1 alpha subcomplex, assembly factor 3                                   |
| 8031387 | 1,59  | 9,12E-03 | -1,20 | 3,02E-01 | 1,32  | 1,15E-01 | 7,58  | 6,61E-03 | 19 | <i>NCR1</i>    | natural cytotoxicity triggering receptor 1                                                              |
| 8179773 | 1,57  | 9,49E-04 | -1,35 | 1,30E-02 | 1,16  | 3,05E-01 | 7,80  | 1,68E-04 | 6  | <i>NCR3</i>    | natural cytotoxicity triggering receptor 3                                                              |
| 8038809 | 1,46  | 4,17E-02 | -1,38 | 5,29E-02 | 1,06  | 8,52E-01 | 11,44 | 2,00E-02 | 19 | <i>NKG7</i>    | natural killer cell group 7 sequence                                                                    |
| 7919854 | 1,04  | 9,08E-01 | 1,31  | 1,47E-02 | 1,36  | 3,40E-03 | 6,95  | 3,79E-03 | 1  | ---            | ncrna:misc_RNA<br>chromosome:GRCh37:1:150854927:150855011:-1<br>gene:ENSG00000212512                    |
| 7899560 | 1,03  | 9,15E-01 | 1,21  | 4,16E-02 | 1,25  | 1,59E-02 | 6,12  | 1,79E-02 | 1  | ---            | ncrna:misc_RNA<br>chromosome:GRCh37:1:29312222:29312322:1<br>gene:ENSG00000206704                       |
| 7914665 | -1,20 | 5,34E-01 | 1,45  | 1,57E-02 | 1,22  | 2,87E-01 | 6,25  | 2,39E-02 | 1  | ---            | ncrna:misc_RNA<br>chromosome:GRCh37:1:33802167:33802465:-1<br>gene:ENSG00000222112                      |
| 7901443 | 1,01  | 9,63E-01 | 1,15  | 1,26E-02 | 1,16  | 5,40E-03 | 6,56  | 4,29E-03 | 1  | ---            | ncrna:misc_RNA<br>chromosome:GRCh37:1:52615776:52616089:1<br>gene:ENSG0000022221                        |
| 7901477 | -1,02 | 9,23E-01 | 1,15  | 3,84E-02 | 1,13  | 9,65E-02 | 4,56  | 4,55E-02 | 1  | ---            | ncrna:misc_RNA<br>chromosome:GRCh37:1:53180071:53180370:1                                               |

|         |       |          |      |          |      |          |      |          |    |     |                                                                                     |
|---------|-------|----------|------|----------|------|----------|------|----------|----|-----|-------------------------------------------------------------------------------------|
|         |       |          |      |          |      |          |      |          |    |     | gene:ENSG00000223289                                                                |
| 7933976 | 1,06  | 7,89E-01 | 1,22 | 1,30E-02 | 1,29 | 8,47E-04 | 8,20 | 1,42E-03 | 10 | --- | ncrna:misc_RNA<br>chromosome:GRCh37:10:69767477:69767774:-1<br>gene:ENSG00000223114 |
| 7934297 | 1,01  | 9,82E-01 | 1,29 | 1,24E-02 | 1,30 | 6,97E-03 | 5,30 | 4,79E-03 | 10 | --- | ncrna:misc_RNA<br>chromosome:GRCh37:10:74842252:74842353:-1<br>gene:ENSG00000201047 |
| 7928489 | 1,23  | 5,36E-01 | 1,85 | 1,18E-03 | 2,29 | 3,00E-06 | 7,56 | 1,36E-05 | 10 | --- | ncrna:misc_RNA<br>chromosome:GRCh37:10:76311150:76311251:1<br>gene:ENSG00000206756  |
| 7947989 | 1,14  | 3,79E-01 | 1,10 | 3,69E-01 | 1,25 | 1,61E-02 | 7,59 | 2,96E-02 | 11 | --- | ncrna:misc_RNA<br>chromosome:GRCh37:11:47748446:47748544:-1<br>gene:ENSG00000200090 |
| 7965429 | 1,07  | 8,87E-01 | 1,33 | 6,32E-02 | 1,43 | 2,13E-02 | 4,24 | 2,68E-02 | 12 | --- | ncrna:misc_RNA<br>chromosome:GRCh37:12:92564129:92564229:-1<br>gene:ENSG00000199895 |
| 7970567 | 1,06  | 6,10E-01 | 1,06 | 2,71E-01 | 1,12 | 2,81E-02 | 3,19 | 4,96E-02 | 13 | --- | ncrna:misc_RNA<br>chromosome:GRCh37:13:23726725:23726825:-1<br>gene:ENSG00000207157 |
| 7971482 | -1,10 | 7,58E-01 | 1,48 | 4,01E-03 | 1,34 | 2,64E-02 | 8,44 | 3,14E-03 | 13 | --- | ncrna:misc_RNA<br>chromosome:GRCh37:13:46743594:46743883:-1<br>gene:ENSG00000222074 |
| 7969091 | 1,35  | 4,05E-01 | 1,41 | 1,24E-01 | 1,89 | 2,35E-03 | 4,92 | 5,92E-03 | 13 | --- | ncrna:misc_RNA<br>chromosome:GRCh37:13:49669527:49669628:1<br>gene:ENSG00000199788  |
| 7969671 | 1,03  | 9,05E-01 | 1,16 | 5,81E-02 | 1,19 | 2,37E-02 | 6,91 | 2,76E-02 | 13 | --- | ncrna:misc_RNA<br>chromosome:GRCh37:13:96821800:96822099:1<br>gene:ENSG00000222656  |
| 7981872 | -1,05 | 7,76E-01 | 1,17 | 2,41E-02 | 1,11 | 1,64E-01 | 6,96 | 3,53E-02 | 15 | --- | ncrna:misc_RNA<br>chromosome:GRCh37:15:23263708:23263986:1<br>gene:ENSG00000238846  |
| 7983677 | -1,00 | 9,96E-01 | 1,18 | 1,17E-02 | 1,17 | 8,54E-03 | 5,09 | 4,85E-03 | 15 | --- | ncrna:misc_RNA<br>chromosome:GRCh37:15:50981097:50981382:1<br>gene:ENSG00000222751  |
| 7989249 | 1,17  | 4,65E-01 | 1,21 | 1,17E-01 | 1,41 | 2,94E-03 | 5,22 | 7,04E-03 | 15 | --- | ncrna:misc_RNA<br>chromosome:GRCh37:15:58996036:58996353:-1<br>gene:ENSG00000199730 |
| 7999382 | 1,08  | 5,28E-01 | 1,15 | 2,52E-02 | 1,23 | 3,51E-04 | 8,08 | 9,96E-04 | 16 | --- | ncrna:misc_RNA                                                                      |

|         |       |          |      |          |      |          |      |          |    |     |                                                                                                                                                                                                                                                                                                                                                                                                                                                                                                                                                                                                                                                                                                                                                                                                                                                                                                                                                                                                                                                                                                                                            |
|---------|-------|----------|------|----------|------|----------|------|----------|----|-----|--------------------------------------------------------------------------------------------------------------------------------------------------------------------------------------------------------------------------------------------------------------------------------------------------------------------------------------------------------------------------------------------------------------------------------------------------------------------------------------------------------------------------------------------------------------------------------------------------------------------------------------------------------------------------------------------------------------------------------------------------------------------------------------------------------------------------------------------------------------------------------------------------------------------------------------------------------------------------------------------------------------------------------------------------------------------------------------------------------------------------------------------|
| 7994343 | 1,09  | 6,68E-01 | 1,15 | 1,31E-01 | 1,25 | 1,14E-02 | 3,34 | 2,19E-02 | 16 | --- | chromosome:GRCh37:16:10315632:10315930:-1<br>gene:ENSG00000222479<br>ncrna:misc_RNA<br>chromosome:GRCh37:16:28194639:28194751:1<br>gene:ENSG00000200138<br>ncrna:misc_RNA<br>chromosome:GRCh37:16:47346938:47347032:-1<br>gene:ENSG00000222767<br>ncrna:misc_RNA<br>chromosome:GRCh37:17:1507670:1507966:-1<br>gene:ENSG00000222655<br>ncrna:misc_RNA<br>chromosome:GRCh37:17:2584242:2584528:1<br>gene:ENSG00000222785<br>ncrna:misc_RNA<br>chromosome:GRCh37:17:62867610:62867902:-1<br>gene:ENSG0000022273<br>ncrna:misc_RNA<br>chromosome:GRCh37:18:23398200:23398496:-1<br>gene:ENSG00000222577<br>ncrna:misc_RNA<br>chromosome:GRCh37:18:9250108:9250209:1<br>gene:ENSG00000207092<br>ncrna:misc_RNA<br>chromosome:GRCh37:19:14323864:14324141:1<br>gene:ENSG00000223021<br>ncrna:misc_RNA<br>chromosome:GRCh37:2:121798186:121798286:-1<br>gene:ENSG00000201584<br>ncrna:misc_RNA<br>chromosome:GRCh37:2:160392755:160392857:-1<br>gene:ENSG00000207117<br>ncrna:misc_RNA<br>chromosome:GRCh37:2:25280901:25281196:1<br>gene:ENSG00000223095<br>ncrna:misc_RNA<br>chromosome:GRCh37:20:33969297:33969610:-1<br>gene:ENSG00000223240 |
| 8001231 | 1,12  | 4,75E-01 | 1,15 | 1,27E-01 | 1,28 | 3,67E-03 | 5,20 | 8,53E-03 | 16 | --- |                                                                                                                                                                                                                                                                                                                                                                                                                                                                                                                                                                                                                                                                                                                                                                                                                                                                                                                                                                                                                                                                                                                                            |
| 8011110 | 1,10  | 7,63E-01 | 1,21 | 1,23E-01 | 1,33 | 1,91E-02 | 6,90 | 3,30E-02 | 17 | --- |                                                                                                                                                                                                                                                                                                                                                                                                                                                                                                                                                                                                                                                                                                                                                                                                                                                                                                                                                                                                                                                                                                                                            |
| 8003771 | 1,03  | 8,78E-01 | 1,18 | 7,12E-03 | 1,21 | 6,46E-04 | 6,93 | 7,85E-04 | 17 | --- |                                                                                                                                                                                                                                                                                                                                                                                                                                                                                                                                                                                                                                                                                                                                                                                                                                                                                                                                                                                                                                                                                                                                            |
| 8017702 | 1,06  | 8,58E-01 | 1,20 | 1,00E-01 | 1,27 | 2,94E-02 | 4,63 | 4,09E-02 | 17 | --- |                                                                                                                                                                                                                                                                                                                                                                                                                                                                                                                                                                                                                                                                                                                                                                                                                                                                                                                                                                                                                                                                                                                                            |
| 8022623 | -1,00 | 9,85E-01 | 1,12 | 4,69E-02 | 1,11 | 6,37E-02 | 6,67 | 4,39E-02 | 18 | --- |                                                                                                                                                                                                                                                                                                                                                                                                                                                                                                                                                                                                                                                                                                                                                                                                                                                                                                                                                                                                                                                                                                                                            |
| 8020086 | 1,09  | 7,18E-01 | 1,34 | 5,76E-03 | 1,45 | 9,20E-05 | 6,31 | 1,98E-04 | 18 | --- |                                                                                                                                                                                                                                                                                                                                                                                                                                                                                                                                                                                                                                                                                                                                                                                                                                                                                                                                                                                                                                                                                                                                            |
| 8026298 | -1,09 | 5,49E-01 | 1,19 | 1,57E-02 | 1,10 | 2,74E-01 | 6,04 | 2,36E-02 | 19 | --- |                                                                                                                                                                                                                                                                                                                                                                                                                                                                                                                                                                                                                                                                                                                                                                                                                                                                                                                                                                                                                                                                                                                                            |
| 8054870 | -1,05 | 9,04E-01 | 1,34 | 2,32E-02 | 1,28 | 6,54E-02 | 7,28 | 2,54E-02 | 2  | --- |                                                                                                                                                                                                                                                                                                                                                                                                                                                                                                                                                                                                                                                                                                                                                                                                                                                                                                                                                                                                                                                                                                                                            |
| 8056100 | 1,13  | 7,62E-01 | 1,50 | 1,30E-02 | 1,69 | 6,46E-04 | 5,03 | 1,22E-03 | 2  | --- |                                                                                                                                                                                                                                                                                                                                                                                                                                                                                                                                                                                                                                                                                                                                                                                                                                                                                                                                                                                                                                                                                                                                            |
| 8040614 | 1,05  | 7,52E-01 | 1,09 | 1,60E-01 | 1,15 | 2,64E-02 | 5,06 | 4,39E-02 | 2  | --- |                                                                                                                                                                                                                                                                                                                                                                                                                                                                                                                                                                                                                                                                                                                                                                                                                                                                                                                                                                                                                                                                                                                                            |
| 8065903 | 1,16  | 2,51E-01 | 1,05 | 6,52E-01 | 1,22 | 3,19E-02 | 6,08 | 4,29E-02 | 20 | --- |                                                                                                                                                                                                                                                                                                                                                                                                                                                                                                                                                                                                                                                                                                                                                                                                                                                                                                                                                                                                                                                                                                                                            |



|         |       |          |       |          |      |          |      |          |    |     |                                                                                      |
|---------|-------|----------|-------|----------|------|----------|------|----------|----|-----|--------------------------------------------------------------------------------------|
| 8069446 | 1,25  | 3,88E-02 | -1,00 | 9,90E-01 | 1,25 | 2,10E-02 | 5,85 | 1,21E-02 | 21 | --- | ncrna:misc_RNA<br>chromosome:GRCh37:21:47955709:47956003:1<br>gene:ENSG00000222201   |
| 8074789 | 1,28  | 6,29E-02 | -1,09 | 5,15E-01 | 1,18 | 2,15E-01 | 4,82 | 4,44E-02 | 22 | --- | ncrna:misc_RNA<br>chromosome:GRCh37:22:22077172:22077471:-1<br>gene:ENSG00000222425  |
| 8074890 | 1,07  | 5,55E-01 | 1,12  | 5,36E-02 | 1,20 | 1,47E-03 | 5,32 | 3,70E-03 | 22 | --- | ncrna:misc_RNA<br>chromosome:GRCh37:22:23603974:23604258:-1<br>gene:ENSG00000222211  |
| 8074057 | -1,02 | 9,46E-01 | 1,24  | 1,66E-02 | 1,21 | 3,13E-02 | 5,43 | 1,41E-02 | 22 | --- | ncrna:misc_RNA<br>chromosome:GRCh37:22:50809639:50809923:1<br>gene:ENSG00000222793   |
| 8081546 | 1,04  | 9,47E-01 | 1,35  | 5,75E-02 | 1,40 | 3,49E-02 | 4,06 | 3,53E-02 | 3  | --- | ncrna:misc_RNA<br>chromosome:GRCh37:3:110445868:110445968:1<br>gene:ENSG00000201426  |
| 8082570 | 1,02  | 9,50E-01 | 1,24  | 2,39E-02 | 1,27 | 1,10E-02 | 4,50 | 1,01E-02 | 3  | --- | ncrna:misc_RNA<br>chromosome:GRCh37:3:129537775:129537876:1<br>gene:ENSG00000202412  |
| 8083445 | 1,24  | 3,49E-01 | 1,25  | 1,45E-01 | 1,55 | 2,12E-03 | 9,41 | 5,45E-03 | 3  | --- | ncrna:misc_RNA<br>chromosome:GRCh37:3:152167061:152167173:1<br>gene:ENSG00000201217  |
| 8083933 | 1,36  | 6,97E-02 | 1,30  | 6,63E-02 | 1,77 | 3,70E-05 | 6,87 | 1,53E-04 | 3  | --- | ncrna:misc_RNA<br>chromosome:GRCh37:3:171955116:171955381:1<br>gene:ENSG00000222342  |
| 8092312 | 1,02  | 8,91E-01 | 1,10  | 6,23E-02 | 1,12 | 2,23E-02 | 2,90 | 2,74E-02 | 3  | --- | ncrna:misc_RNA<br>chromosome:GRCh37:3:180454196:180454491:-1<br>gene:ENSG00000222360 |
| 8092957 | 1,01  | 9,80E-01 | 1,44  | 1,18E-03 | 1,45 | 1,13E-04 | 6,26 | 1,10E-04 | 3  | --- | ncrna:misc_RNA<br>chromosome:GRCh37:3:195140165:195140275:-1<br>gene:ENSG00000207368 |
| 8078260 | 1,08  | 7,76E-01 | 1,26  | 3,23E-02 | 1,37 | 2,93E-03 | 6,07 | 4,91E-03 | 3  | --- | ncrna:misc_RNA<br>chromosome:GRCh37:3:23315298:23315401:1<br>gene:ENSG00000206728    |
| 8079149 | 1,05  | 9,08E-01 | 1,27  | 5,44E-02 | 1,33 | 2,31E-02 | 9,01 | 2,64E-02 | 3  | --- | ncrna:misc_RNA<br>chromosome:GRCh37:3:43356443:43356745:1<br>gene:ENSG00000222330    |
| 8079368 | 1,49  | 1,33E-02 | -1,13 | 4,49E-01 | 1,32 | 8,11E-02 | 5,65 | 8,75E-03 | 3  | --- | ncrna:misc_RNA<br>chromosome:GRCh37:3:45784167:45784460:1<br>gene:ENSG00000223285    |

|         |       |          |       |          |      |          |      |          |   |     |                                                                                      |
|---------|-------|----------|-------|----------|------|----------|------|----------|---|-----|--------------------------------------------------------------------------------------|
| 8097470 | 1,02  | 9,45E-01 | 1,23  | 1,16E-02 | 1,26 | 3,05E-03 | 5,82 | 3,05E-03 | 4 | --- | ncrna:misc_RNA<br>chromosome:GRCh37:4:140021531:140021815:1<br>gene:ENSG00000223000  |
| 8102936 | 1,41  | 1,92E-01 | 1,08  | 7,70E-01 | 1,52 | 3,52E-02 | 4,74 | 3,95E-02 | 4 | --- | ncrna:misc_RNA<br>chromosome:GRCh37:4:141621989:141622096:-1<br>gene:ENSG00000207155 |
| 8097743 | 1,09  | 6,02E-01 | 1,18  | 5,20E-02 | 1,29 | 1,72E-03 | 5,11 | 4,16E-03 | 4 | --- | ncrna:misc_RNA<br>chromosome:GRCh37:4:148730077:148730358:1<br>gene:ENSG00000222217  |
| 8094717 | 1,15  | 3,30E-01 | 1,20  | 5,93E-02 | 1,38 | 4,30E-04 | 4,08 | 1,42E-03 | 4 | --- | ncrna:misc_RNA<br>chromosome:GRCh37:4:39762620:39762921:1<br>gene:ENSG00000223178    |
| 8095159 | 1,10  | 7,47E-01 | 1,26  | 5,02E-02 | 1,38 | 4,57E-03 | 7,41 | 8,26E-03 | 4 | --- | ncrna:misc_RNA<br>chromosome:GRCh37:4:56278803:56278905:1<br>gene:ENSG00000239040    |
| 8101585 | -1,06 | 8,40E-01 | 1,30  | 1,35E-02 | 1,23 | 5,92E-02 | 5,50 | 1,47E-02 | 4 | --- | ncrna:misc_RNA<br>chromosome:GRCh37:4:85608890:85609152:-1<br>gene:ENSG00000222903   |
| 8128604 | 1,16  | 2,03E-01 | 1,11  | 2,66E-01 | 1,29 | 2,48E-03 | 5,39 | 5,75E-03 | 6 | --- | ncrna:misc_RNA<br>chromosome:GRCh37:6:106731290:106731586:-1<br>gene:ENSG00000238396 |
| 8121884 | 1,40  | 1,73E-02 | 1,05  | 7,58E-01 | 1,48 | 1,85E-03 | 6,88 | 2,00E-03 | 6 | --- | ncrna:misc_RNA<br>chromosome:GRCh37:6:126196314:126196628:1<br>gene:ENSG00000222445  |
| 8119078 | 1,05  | 7,15E-01 | 1,09  | 1,43E-01 | 1,15 | 1,82E-02 | 4,70 | 3,26E-02 | 6 | --- | ncrna:misc_RNA<br>chromosome:GRCh37:6:36489968:36490275:1<br>gene:ENSG00000238332    |
| 8119856 | 1,12  | 2,02E-02 | -1,07 | 1,49E-01 | 1,05 | 4,06E-01 | 2,72 | 1,52E-02 | 6 | --- | ncrna:misc_RNA<br>chromosome:GRCh37:6:43511881:43512007:1<br>gene:ENSG00000238338    |
| 8127660 | 1,13  | 2,15E-01 | 1,08  | 2,70E-01 | 1,22 | 2,90E-03 | 5,48 | 6,49E-03 | 6 | --- | ncrna:misc_RNA<br>chromosome:GRCh37:6:76364686:76365015:-1<br>gene:ENSG00000200091   |
| 8121085 | -1,03 | 8,63E-01 | 1,16  | 2,68E-02 | 1,12 | 1,13E-01 | 4,08 | 3,53E-02 | 6 | --- | ncrna:misc_RNA<br>chromosome:GRCh37:6:89800665:89800959:1<br>gene:ENSG00000222699    |
| 8136889 | 1,09  | 5,56E-01 | 1,10  | 2,71E-01 | 1,20 | 2,10E-02 | 7,19 | 3,94E-02 | 7 | --- | ncrna:misc_RNA<br>chromosome:GRCh37:7:142987708:142988004:1<br>gene:ENSG00000222498  |

|         |       |          |      |          |      |          |      |          |   |     |                                                                                      |
|---------|-------|----------|------|----------|------|----------|------|----------|---|-----|--------------------------------------------------------------------------------------|
| 8147650 | 1,30  | 1,92E-01 | 1,26 | 1,21E-01 | 1,64 | 5,05E-04 | 5,74 | 1,67E-03 | 8 | --- | ncrna:misc_RNA<br>chromosome:GRCh37:8:100540054:100540155:1<br>gene:ENSG00000206699  |
| 8148329 | -1,07 | 6,15E-01 | 1,16 | 2,19E-02 | 1,08 | 2,88E-01 | 6,94 | 3,49E-02 | 8 | --- | ncrna:misc_RNA<br>chromosome:GRCh37:8:130303229:130303531:1<br>gene:ENSG00000222755  |
| 8145887 | -1,09 | 5,10E-01 | 1,19 | 1,61E-02 | 1,09 | 3,14E-01 | 5,44 | 2,52E-02 | 8 | --- | ncrna:misc_RNA<br>chromosome:GRCh37:8:37766252:37766553:1<br>gene:ENSG00000222502    |
| 8146305 | 1,11  | 7,51E-01 | 1,25 | 1,16E-01 | 1,39 | 1,59E-02 | 6,66 | 2,73E-02 | 8 | --- | ncrna:misc_RNA<br>chromosome:GRCh37:8:43008119:43008197:1<br>gene:ENSG00000238589    |
| 8151411 | 1,02  | 9,51E-01 | 1,31 | 1,74E-03 | 1,33 | 2,35E-04 | 7,65 | 1,84E-04 | 8 | --- | ncrna:misc_RNA<br>chromosome:GRCh37:8:74746010:74746277:-1<br>gene:ENSG00000222948   |
| 8146955 | 1,04  | 9,08E-01 | 1,26 | 5,06E-02 | 1,31 | 2,04E-02 | 8,88 | 2,35E-02 | 8 | --- | ncrna:misc_RNA<br>chromosome:GRCh37:8:75288922:75289028:1<br>gene:ENSG00000207417    |
| 8151869 | 1,04  | 8,16E-01 | 1,16 | 3,50E-02 | 1,21 | 4,63E-03 | 5,55 | 7,06E-03 | 8 | --- | ncrna:misc_RNA<br>chromosome:GRCh37:8:95725943:95726040:-1<br>gene:ENSG00000199701   |
| 8163015 | 1,05  | 6,84E-01 | 1,08 | 1,60E-01 | 1,14 | 1,65E-02 | 5,67 | 3,09E-02 | 9 | --- | ncrna:misc_RNA<br>chromosome:GRCh37:9:110573898:110574195:-1<br>gene:ENSG00000223122 |
| 8163105 | 1,11  | 3,13E-01 | 1,11 | 1,15E-01 | 1,24 | 1,19E-03 | 4,27 | 3,28E-03 | 9 | --- | ncrna:misc_RNA<br>chromosome:GRCh37:9:111804666:111804767:-1<br>gene:ENSG00000199331 |
| 8163426 | -1,05 | 7,85E-01 | 1,19 | 2,02E-02 | 1,13 | 1,34E-01 | 6,84 | 2,82E-02 | 9 | --- | ncrna:misc_RNA<br>chromosome:GRCh37:9:115034868:115035111:-1<br>gene:ENSG00000222882 |
| 8155246 | 1,20  | 4,26E-01 | 1,26 | 1,03E-01 | 1,51 | 1,83E-03 | 6,56 | 4,84E-03 | 9 | --- | ncrna:misc_RNA<br>chromosome:GRCh37:9:37160134:37160234:1<br>gene:ENSG00000200502    |
| 8161737 | 1,30  | 2,85E-01 | 1,11 | 5,88E-01 | 1,44 | 2,89E-02 | 5,87 | 4,13E-02 | 9 | --- | ncrna:misc_RNA<br>chromosome:GRCh37:9:74517371:74517466:-1<br>gene:ENSG00000200922   |
| 8171193 | 1,27  | 1,33E-01 | 1,05 | 7,31E-01 | 1,34 | 1,88E-02 | 5,67 | 2,18E-02 | X | --- | ncrna:misc_RNA<br>chromosome:GRCh37:X:3559484:3559596:-1<br>gene:ENSG00000207320     |

|         |       |          |       |          |      |          |      |          |    |     |                                                                                                                                                                |
|---------|-------|----------|-------|----------|------|----------|------|----------|----|-----|----------------------------------------------------------------------------------------------------------------------------------------------------------------|
| 8166948 | -1,05 | 9,36E-01 | 1,49  | 3,61E-02 | 1,41 | 8,23E-02 | 9,02 | 3,98E-02 | X  | --- | ncrna:misc_RNA<br>chromosome:GRCh37:X:44260849:44260950:1<br>gene:ENSG00000200702                                                                              |
| 8173607 | 1,51  | 8,77E-03 | 1,26  | 1,18E-01 | 1,90 | 5,00E-06 | 9,43 | 2,08E-05 | X  | --- | ncrna:misc_RNA<br>chromosome:GRCh37:X:73462445:73462741:-1<br>gene:ENSG00000222195                                                                             |
| 7922456 | 1,01  | 9,73E-01 | 1,29  | 2,68E-02 | 1,31 | 1,82E-02 | 6,20 | 1,50E-02 | 1  | --- | ncrna:rRNA chromosome:GRCh37:1:173938456:173938574:-1<br>gene:ENSG00000200755                                                                                  |
| 7915202 | -1,01 | 9,67E-01 | 1,19  | 8,19E-03 | 1,18 | 8,04E-03 | 5,20 | 3,70E-03 | 1  | --- | ncrna:rRNA chromosome:GRCh37:1:39619863:39619968:-1<br>gene:ENSG00000222378                                                                                    |
| 7932017 | 1,01  | 9,75E-01 | 1,13  | 4,79E-02 | 1,14 | 3,90E-02 | 2,88 | 3,37E-02 | 10 | --- | ncrna:rRNA chromosome:GRCh37:10:8698679:8698794:-1<br>gene:ENSG00000212505                                                                                     |
| 7942645 | 1,11  | 7,88E-01 | 1,25  | 1,46E-01 | 1,39 | 3,02E-02 | 6,34 | 4,84E-02 | 11 | --- | ncrna:rRNA chromosome:GRCh37:11:75645975:75646083:1<br>gene:ENSG00000223013                                                                                    |
| 8112070 | 1,17  | 6,52E-01 | 1,25  | 1,74E-01 | 1,47 | 1,61E-02 | 6,36 | 3,06E-02 | 5  | --- | ncrna:rRNA chromosome:GRCh37:11:97528464:97528582:1<br>gene:ENSG00000199315 /// ncrna:rRNA<br>chromosome:GRCh37:5:54480742:54480855:-1<br>gene:ENSG00000201369 |
| 7961960 | 1,16  | 5,86E-01 | 1,30  | 5,00E-02 | 1,51 | 1,50E-03 | 5,78 | 3,76E-03 | 12 | --- | ncrna:rRNA chromosome:GRCh37:12:26526557:26526666:-1<br>gene:ENSG00000212549                                                                                   |
| 7965150 | 1,42  | 1,77E-01 | 1,36  | 1,18E-01 | 1,93 | 3,91E-04 | 4,57 | 1,33E-03 | 12 | --- | ncrna:rRNA chromosome:GRCh37:12:80272085:80272199:-1<br>gene:ENSG00000201942                                                                                   |
| 7971013 | 1,07  | 8,02E-01 | 1,22  | 5,64E-02 | 1,30 | 8,71E-03 | 5,72 | 1,39E-02 | 13 | --- | ncrna:rRNA chromosome:GRCh37:13:37372412:37372515:-1<br>gene:ENSG00000199873                                                                                   |
| 7969370 | -1,04 | 8,03E-01 | 1,18  | 9,29E-03 | 1,13 | 4,93E-02 | 5,92 | 8,54E-03 | 13 | --- | ncrna:rRNA chromosome:GRCh37:13:72552226:72552344:1<br>gene:ENSG00000200037                                                                                    |
| 8003087 | 1,08  | 8,24E-01 | 1,28  | 4,78E-02 | 1,38 | 8,13E-03 | 6,54 | 1,21E-02 | 16 | --- | ncrna:rRNA chromosome:GRCh37:16:84073523:84073638:-1<br>gene:ENSG00000199350                                                                                   |
| 8004219 | -1,03 | 8,80E-01 | 1,16  | 3,17E-02 | 1,12 | 1,15E-01 | 4,29 | 4,10E-02 | 17 | --- | ncrna:rRNA chromosome:GRCh37:17:6890784:6890903:1<br>gene:ENSG00000222165                                                                                      |
| 8045347 | 1,43  | 7,13E-02 | -1,01 | 9,59E-01 | 1,41 | 4,39E-02 | 4,70 | 2,56E-02 | 2  | --- | ncrna:rRNA<br>chromosome:GRCh37:2:134988766:134988883:1<br>gene:ENSG00000222921                                                                                |
| 8041223 | -1,09 | 4,56E-01 | 1,19  | 1,18E-02 | 1,09 | 2,81E-01 | 5,99 | 1,65E-02 | 2  | --- | ncrna:rRNA chromosome:GRCh37:2:31451178:31451287:1<br>gene:ENSG00000201671                                                                                     |
| 8078603 | 1,25  | 1,35E-01 | 1,08  | 5,93E-01 | 1,35 | 1,02E-02 | 6,00 | 1,46E-02 | 3  | --- | ncrna:rRNA chromosome:GRCh37:3:37383140:37383257:1<br>gene:ENSG00000222208                                                                                     |
| 8095214 | 1,16  | 2,91E-01 | 1,09  | 3,80E-01 | 1,27 | 1,07E-02 | 7,27 | 1,98E-02 | 4  | --- | ncrna:rRNA chromosome:GRCh37:4:56963556:56963670:1<br>gene:ENSG00000200741                                                                                     |

|         |       |          |      |          |      |          |      |          |    |     |                                                                                    |
|---------|-------|----------|------|----------|------|----------|------|----------|----|-----|------------------------------------------------------------------------------------|
| 8113035 | 1,02  | 9,53E-01 | 1,21 | 4,76E-02 | 1,23 | 2,90E-02 | 5,81 | 2,76E-02 | 5  | --- | ncrna:rRNA chromosome:GRCh37:5:87570075:87570193:-1<br>gene:ENSG00000207129        |
| 8143385 | -1,07 | 7,04E-01 | 1,24 | 5,76E-03 | 1,16 | 5,24E-02 | 7,19 | 5,13E-03 | 7  | --- | ncrna:rRNA chromosome:GRCh37:7:140086581:140086707:-1<br>gene:ENSG00000202472      |
| 8139055 | 1,08  | 8,04E-01 | 1,23 | 8,71E-02 | 1,33 | 1,53E-02 | 6,96 | 2,44E-02 | 7  | --- | ncrna:rRNA chromosome:GRCh37:7:36633278:36633375:-1<br>gene:ENSG00000222789        |
| 8163326 | 1,14  | 3,22E-01 | 1,15 | 1,28E-01 | 1,31 | 1,50E-03 | 6,37 | 4,16E-03 | 9  | --- | ncrna:rRNA chromosome:GRCh37:9:114173914:114174022:-1<br>gene:ENSG00000223238      |
| 8156599 | 1,06  | 8,31E-01 | 1,21 | 5,50E-02 | 1,29 | 1,11E-02 | 7,05 | 1,65E-02 | 9  | --- | ncrna:rRNA chromosome:GRCh37:9:98667287:98667402:1<br>gene:ENSG00000199202         |
| 7904048 | -1,04 | 9,28E-01 | 1,43 | 9,29E-03 | 1,37 | 1,47E-02 | 7,57 | 5,09E-03 | 1  | --- | ncrna:snoRNA<br>chromosome:GRCh37:1:113195210:113195310:1<br>gene:ENSG00000238975  |
| 7898294 | 1,02  | 9,15E-01 | 1,16 | 2,21E-02 | 1,19 | 6,97E-03 | 2,82 | 7,06E-03 | 1  | --- | ncrna:snoRNA<br>chromosome:GRCh37:1:16237392:16237492:1<br>gene:ENSG00000238818    |
| 7913185 | 1,01  | 9,58E-01 | 1,17 | 1,17E-02 | 1,19 | 4,15E-03 | 5,32 | 3,58E-03 | 1  | --- | ncrna:snoRNA chromosome:GRCh37:1:19858664:19858768:-1<br>gene:ENSG00000239027      |
| 7909839 | 1,10  | 5,55E-01 | 1,18 | 4,16E-02 | 1,30 | 9,61E-04 | 3,89 | 2,50E-03 | 1  | --- | ncrna:snoRNA<br>chromosome:GRCh37:1:220310506:220310608:1<br>gene:ENSG00000238576  |
| 7933731 | -1,01 | 9,85E-01 | 1,45 | 1,27E-02 | 1,44 | 1,26E-02 | 4,16 | 6,67E-03 | 10 | --- | ncrna:snoRNA<br>chromosome:GRCh37:10:59998418:59998521:-1<br>gene:ENSG00000238970  |
| 7928216 | 1,11  | 2,88E-01 | 1,10 | 1,54E-01 | 1,22 | 1,62E-03 | 5,87 | 4,44E-03 | 10 | --- | ncrna:snoRNA<br>chromosome:GRCh37:10:73085085:73085188:1<br>gene:ENSG00000238918   |
| 7937913 | 1,11  | 3,25E-01 | 1,15 | 4,53E-02 | 1,27 | 2,33E-04 | 6,36 | 8,04E-04 | 11 | --- | ncrna:snoRNA chromosome:GRCh37:11:3943797:3943933:1<br>gene:ENSG00000206976        |
| 7941563 | 1,18  | 5,21E-01 | 1,44 | 9,29E-03 | 1,69 | 5,50E-05 | 6,23 | 1,64E-04 | 11 | --- | ncrna:snoRNA<br>chromosome:GRCh37:11:65920092:65920196:1<br>gene:ENSG00000238763   |
| 7958015 | 1,16  | 1,82E-01 | 1,08 | 3,93E-01 | 1,26 | 5,03E-03 | 5,50 | 9,51E-03 | 12 | --- | ncrna:snoRNA<br>chromosome:GRCh37:12:102183593:102183693:1<br>gene:ENSG00000238940 |
| 7957159 | -1,04 | 8,25E-01 | 1,18 | 1,41E-02 | 1,13 | 6,92E-02 | 5,00 | 1,64E-02 | 12 | --- | ncrna:snoRNA<br>chromosome:GRCh37:12:72033135:72033263:1<br>gene:ENSG00000212461   |

|         |      |          |      |          |      |          |      |          |    |     |                                                                                                                                                                                                                                                                                                                                                                                                                                                                                                                                                                                                                                                                                                            |
|---------|------|----------|------|----------|------|----------|------|----------|----|-----|------------------------------------------------------------------------------------------------------------------------------------------------------------------------------------------------------------------------------------------------------------------------------------------------------------------------------------------------------------------------------------------------------------------------------------------------------------------------------------------------------------------------------------------------------------------------------------------------------------------------------------------------------------------------------------------------------------|
| 7969675 | 1,05 | 8,05E-01 | 1,11 | 1,41E-01 | 1,16 | 3,19E-02 | 3,60 | 4,96E-02 | 13 | --- | ncrna:snoRNA<br>chromosome:GRCh37:13:97709633:97709734:1<br>gene:ENSG00000238522                                                                                                                                                                                                                                                                                                                                                                                                                                                                                                                                                                                                                           |
| 7999884 | 1,25 | 1,31E-01 | 1,25 | 5,36E-02 | 1,55 | 6,40E-05 | 5,66 | 2,44E-04 | 16 | --- | ncrna:snoRNA<br>chromosome:GRCh37:16:18881488:18881591:-1<br>gene:ENSG00000238329                                                                                                                                                                                                                                                                                                                                                                                                                                                                                                                                                                                                                          |
| 8000690 | 1,49 | 3,22E-03 | 1,09 | 5,71E-01 | 1,62 | 6,80E-05 | 9,37 | 1,22E-04 | 16 | --- | ncrna:snoRNA<br>chromosome:GRCh37:16:18881488:18881591:-1<br>gene:ENSG00000238329 /// ncrna:snoRNA<br>chromosome:GRCh37:16:21468647:21468750:-1<br>gene:ENSG00000238954 /// ncrna:snoRNA<br>chromosome:GRCh37:16:21900888:21900991:-1<br>gene:ENSG00000238712 /// ncrna:snoRNA<br>chromosome:GRCh37:16:22492795:22492898:1<br>gene:ENSG00000239172 /// ncrna:snoRNA<br>chromosome:GRCh37:16:29448818:29448921:-1<br>gene:ENSG00000238639 /// ncrna:snoRNA<br>chromosome:GRCh37:16:29550583:29550686:-1<br>gene:ENSG00000239193 /// ncrna:snoRNA<br>chromosome:GRCh37:16:30290569:30290672:-1<br>gene:ENSG00000239114 /// ncrna:snoRNA<br>chromosome:GRCh37:16:70266882:70266985:-1<br>gene:ENSG00000238734 |
| 8002342 | 1,40 | 3,88E-02 | 1,07 | 7,20E-01 | 1,49 | 4,49E-03 | 6,44 | 4,84E-03 | 16 | --- | ncrna:snoRNA<br>chromosome:GRCh37:16:18881488:18881591:-1<br>gene:ENSG00000238329 /// ncrna:snoRNA<br>chromosome:GRCh37:16:21468647:21468750:-1<br>gene:ENSG00000238954 /// ncrna:snoRNA<br>chromosome:GRCh37:16:21900888:21900991:-1<br>gene:ENSG00000238712 /// ncrna:snoRNA<br>chromosome:GRCh37:16:22492795:22492898:1<br>gene:ENSG00000239172 /// ncrna:snoRNA<br>chromosome:GRCh37:16:29448818:29448921:-1<br>gene:ENSG00000238639 /// ncrna:snoRNA<br>chromosome:GRCh37:16:29550583:29550686:-1<br>gene:ENSG00000239193 /// ncrna:snoRNA<br>chromosome:GRCh37:16:30290569:30290672:-1<br>gene:ENSG00000239114 /// ncrna:snoRNA<br>chromosome:GRCh37:16:70266882:70266985:-1                         |

|         |       |          |       |          |       |          |      |          |    |     |                                                                                    |
|---------|-------|----------|-------|----------|-------|----------|------|----------|----|-----|------------------------------------------------------------------------------------|
|         |       |          |       |          |       |          |      |          |    |     | gene:ENSG00000238734                                                               |
| 8001371 | 1,10  | 6,87E-01 | 1,15  | 2,14E-01 | 1,26  | 2,69E-02 | 5,60 | 4,74E-02 | 16 | --- | ncrna:snoRNA<br>chromosome:GRCh37:16:50386100:50386203:-1<br>gene:ENSG00000238544  |
| 7996759 | 1,10  | 4,96E-01 | 1,09  | 3,23E-01 | 1,20  | 2,15E-02 | 6,05 | 3,95E-02 | 16 | --- | ncrna:snoRNA<br>chromosome:GRCh37:16:68223190:68223324:1<br>gene:ENSG00000212445   |
| 8003769 | -1,00 | 9,95E-01 | 1,28  | 1,18E-02 | 1,28  | 9,28E-03 | 6,96 | 5,27E-03 | 17 | --- | ncrna:snoRNA chromosome:GRCh37:17:2558973:2559076:1<br>gene:ENSG00000239024        |
| 8016431 | 1,16  | 5,21E-01 | 1,15  | 3,12E-01 | 1,33  | 2,30E-02 | 3,95 | 4,17E-02 | 17 | --- | ncrna:snoRNA<br>chromosome:GRCh37:17:46459734:46459948:-1<br>gene:ENSG00000200538  |
| 8016787 | 1,00  | 9,93E-01 | 1,33  | 3,03E-03 | 1,34  | 1,05E-03 | 7,32 | 5,69E-04 | 17 | --- | ncrna:snoRNA<br>chromosome:GRCh37:17:49175535:49175639:-1<br>gene:ENSG00000238815  |
| 8010285 | -1,02 | 8,90E-01 | 1,15  | 1,65E-02 | 1,12  | 5,24E-02 | 6,65 | 1,73E-02 | 17 | --- | ncrna:snoRNA<br>chromosome:GRCh37:17:76396016:76396144:1<br>gene:ENSG00000200063   |
| 8057439 | -1,01 | 9,73E-01 | 1,24  | 4,41E-02 | 1,22  | 6,85E-02 | 5,20 | 4,35E-02 | 2  | --- | ncrna:snoRNA<br>chromosome:GRCh37:2:180799128:180799265:-1<br>gene:ENSG00000202216 |
| 8050472 | 1,07  | 2,52E-01 | -1,09 | 3,61E-02 | -1,02 | 7,79E-01 | 2,51 | 4,41E-02 | 2  | --- | ncrna:snoRNA chromosome:GRCh37:2:18221872:18221999:-1<br>gene:ENSG00000212455      |
| 8058518 | 1,02  | 9,57E-01 | 1,22  | 5,09E-02 | 1,24  | 3,46E-02 | 4,45 | 3,32E-02 | 2  | --- | ncrna:snoRNA<br>chromosome:GRCh37:2:208938785:208938886:-1<br>gene:ENSG00000238582 |
| 8041170 | 1,11  | 7,53E-01 | 1,26  | 9,93E-02 | 1,40  | 1,28E-02 | 7,57 | 2,24E-02 | 2  | --- | ncrna:snoRNA<br>chromosome:GRCh37:2:29150849:29150926:1<br>gene:ENSG00000212326    |
| 8050213 | -1,01 | 9,79E-01 | 1,34  | 2,29E-02 | 1,32  | 2,97E-02 | 7,50 | 1,75E-02 | 2  | --- | ncrna:snoRNA chromosome:GRCh37:2:9672371:9672474:-1<br>gene:ENSG00000238462        |
| 8070081 | -1,01 | 9,80E-01 | 1,12  | 4,74E-02 | 1,11  | 6,95E-02 | 6,32 | 4,59E-02 | 21 | --- | ncrna:snoRNA<br>chromosome:GRCh37:21:34214171:34214305:-1<br>gene:ENSG00000207098  |
| 8084124 | 1,02  | 8,60E-01 | -1,10 | 2,78E-02 | -1,07 | 1,18E-01 | 2,52 | 3,67E-02 | 3  | --- | ncrna:snoRNA<br>chromosome:GRCh37:3:180260489:180260624:1<br>gene:ENSG00000201810  |
| 8116577 | 1,03  | 8,50E-01 | 1,12  | 6,30E-02 | 1,15  | 1,49E-02 | 3,35 | 2,14E-02 | 6  | --- | ncrna:snoRNA chromosome:GRCh37:6:1186753:1186855:1                                 |

|         |       |          |      |          |      |          |      |          |    |     |                                                                                    |
|---------|-------|----------|------|----------|------|----------|------|----------|----|-----|------------------------------------------------------------------------------------|
|         |       |          |      |          |      |          |      |          |    |     | gene:ENSG00000238438                                                               |
| 8117286 | 1,03  | 8,98E-01 | 1,18 | 1,65E-02 | 1,21 | 3,67E-03 | 5,73 | 4,29E-03 | 6  | --- | ncrna:snoRNA<br>chromosome:GRCh37:6:25435508:25435611:1<br>gene:ENSG00000238322    |
| 8121062 | 1,09  | 4,53E-01 | 1,10 | 1,81E-01 | 1,21 | 6,11E-03 | 3,25 | 1,33E-02 | 6  | --- | ncrna:snoRNA<br>chromosome:GRCh37:6:88430633:88430736:1<br>gene:ENSG00000238628    |
| 8128075 | 1,16  | 3,81E-01 | 1,15 | 2,18E-01 | 1,33 | 5,63E-03 | 5,40 | 1,24E-02 | 6  | --- | ncrna:snoRNA chromosome:GRCh37:6:89423961:89424149:-1<br>gene:ENSG00000222145      |
| 8139083 | 1,16  | 2,88E-01 | 1,18 | 9,02E-02 | 1,36 | 6,46E-04 | 6,44 | 2,00E-03 | 7  | --- | ncrna:snoRNA chromosome:GRCh37:7:37209283:37209384:-1<br>gene:ENSG00000238772      |
| 8131335 | 1,11  | 3,21E-01 | 1,07 | 3,92E-01 | 1,19 | 1,32E-02 | 3,10 | 2,43E-02 | 7  | --- | ncrna:snoRNA chromosome:GRCh37:7:5525026:5525132:1<br>gene:ENSG00000238394         |
| 8152863 | 1,25  | 4,67E-01 | 1,44 | 3,96E-02 | 1,80 | 5,05E-04 | 7,52 | 1,54E-03 | 8  | --- | ncrna:snoRNA<br>chromosome:GRCh37:8:130880836:130880962:-1<br>gene:ENSG00000200075 |
| 8150862 | 1,04  | 9,49E-01 | 1,66 | 2,85E-03 | 1,72 | 3,91E-04 | 5,75 | 2,88E-04 | 8  | --- | ncrna:snoRNA chromosome:GRCh37:8:56815282:56815414:-1<br>gene:ENSG00000199405      |
| 8158684 | -1,04 | 8,78E-01 | 1,20 | 3,35E-02 | 1,15 | 1,23E-01 | 4,35 | 4,41E-02 | 9  | --- | ncrna:snoRNA<br>chromosome:GRCh37:9:133325241:133325342:1<br>gene:ENSG00000238298  |
| 8174592 | 1,04  | 7,34E-01 | 1,10 | 7,58E-02 | 1,14 | 7,97E-03 | 2,78 | 1,42E-02 | X  | --- | ncrna:snoRNA<br>chromosome:GRCh37:X:112244247:112244356:-1<br>gene:ENSG00000238811 |
| 7925607 | 1,17  | 1,86E-01 | 1,06 | 5,55E-01 | 1,24 | 1,27E-02 | 3,93 | 1,92E-02 | 1  | --- | ncrna:snRNA<br>chromosome:GRCh37:1:246352316:246352420:-1<br>gene:ENSG00000202184  |
| 7901383 | -1,03 | 8,12E-01 | 1,15 | 9,29E-03 | 1,11 | 4,46E-02 | 2,71 | 8,26E-03 | 1  | --- | ncrna:snRNA chromosome:GRCh37:1:51847980:51848086:1<br>gene:ENSG00000206595        |
| 7916743 | 1,03  | 8,25E-01 | 1,13 | 1,70E-02 | 1,17 | 1,77E-03 | 5,02 | 3,01E-03 | 1  | --- | ncrna:snRNA chromosome:GRCh37:1:64494566:64494668:-1<br>gene:ENSG00000207190       |
| 7932635 | 1,44  | 3,78E-02 | 1,30 | 9,61E-02 | 1,87 | 2,90E-05 | 5,90 | 1,35E-04 | 10 | --- | ncrna:snRNA chromosome:GRCh37:10:27079469:27079575:-1<br>gene:ENSG00000206605      |
| 7944525 | 1,17  | 3,48E-01 | 1,27 | 2,22E-02 | 1,49 | 7,50E-05 | 6,88 | 2,88E-04 | 11 | --- | ncrna:snRNA<br>chromosome:GRCh37:11:119527021:119527126:1<br>gene:ENSG00000199217  |
| 7940580 | 1,09  | 5,69E-01 | 1,18 | 3,39E-02 | 1,28 | 7,25E-04 | 6,12 | 1,88E-03 | 11 | --- | ncrna:snRNA<br>chromosome:GRCh37:11:61705366:61705472:1                            |



|         |       |          |      |          |      |          |      |          |    |     |                                                                                                                                                                    |
|---------|-------|----------|------|----------|------|----------|------|----------|----|-----|--------------------------------------------------------------------------------------------------------------------------------------------------------------------|
|         |       |          |      |          |      |          |      |          |    |     | gene:ENSG00000200898                                                                                                                                               |
| 7965838 | 1,20  | 3,40E-01 | 1,15 | 2,67E-01 | 1,38 | 6,97E-03 | 5,04 | 1,43E-02 | 12 | --- | ncrna:snRNA<br>chromosome:GRCh37:12:102190188:102190296:-1<br>gene:ENSG00000222932                                                                                 |
| 7966223 | 1,12  | 4,78E-01 | 1,09 | 3,65E-01 | 1,23 | 2,62E-02 | 6,01 | 4,55E-02 | 12 | --- | ncrna:snRNA<br>chromosome:GRCh37:12:110005780:110005920:-1<br>gene:ENSG00000200274                                                                                 |
| 7959014 | 1,15  | 3,75E-01 | 1,18 | 9,85E-02 | 1,37 | 1,30E-03 | 3,62 | 3,70E-03 | 12 | --- | ncrna:snRNA<br>chromosome:GRCh37:12:116520375:116520481:1<br>gene:ENSG00000200665                                                                                  |
| 7961420 | 1,06  | 8,59E-01 | 1,21 | 6,94E-02 | 1,28 | 1,83E-02 | 3,06 | 2,54E-02 | 12 | --- | ncrna:snRNA chromosome:GRCh37:12:13612604:13612710:-1<br>gene:ENSG00000201909                                                                                      |
| 7955248 | 1,05  | 6,55E-01 | 1,07 | 2,03E-01 | 1,12 | 2,10E-02 | 3,27 | 3,84E-02 | 12 | --- | ncrna:snRNA<br>chromosome:GRCh37:12:49986887:49986996:1<br>gene:ENSG00000199237                                                                                    |
| 7955419 | 1,14  | 6,90E-01 | 1,29 | 6,72E-02 | 1,46 | 4,57E-03 | 6,62 | 8,83E-03 | 12 | --- | ncrna:snRNA<br>chromosome:GRCh37:12:51050756:51050861:1<br>gene:ENSG00000200183                                                                                    |
| 8132830 | 1,13  | 6,94E-01 | 1,29 | 6,28E-02 | 1,46 | 4,15E-03 | 6,01 | 8,29E-03 | 7  | --- | ncrna:snRNA<br>chromosome:GRCh37:12:51556684:51556790:1<br>gene:ENSG00000199824 /// ncrna:snRNA<br>chromosome:GRCh37:7:50503078:50503184:1<br>gene:ENSG00000200815 |
| 7964640 | 1,41  | 4,05E-01 | 1,23 | 4,60E-01 | 1,74 | 2,96E-02 | 5,24 | 4,93E-02 | 12 | --- | ncrna:snRNA chromosome:GRCh37:12:62727872:62727978:-1<br>gene:ENSG00000200814                                                                                      |
| 7952984 | 1,12  | 8,16E-01 | 1,45 | 3,45E-02 | 1,61 | 4,50E-03 | 6,01 | 6,87E-03 | 12 | --- | ncrna:snRNA chromosome:GRCh37:12:890297:890365:1<br>gene:ENSG00000221439                                                                                           |
| 7967872 | -1,01 | 9,61E-01 | 1,16 | 1,88E-02 | 1,15 | 2,94E-02 | 4,55 | 1,50E-02 | 13 | --- | ncrna:snRNA<br>chromosome:GRCh37:13:19454194:19454297:1<br>gene:ENSG00000206787                                                                                    |
| 7968295 | 1,39  | 1,75E-01 | 1,66 | 7,12E-03 | 2,31 | 3,00E-06 | 4,27 | 1,37E-05 | 13 | --- | ncrna:snRNA<br>chromosome:GRCh37:13:28806638:28806744:1<br>gene:ENSG00000200840                                                                                    |
| 7971996 | 1,12  | 5,21E-01 | 1,20 | 5,36E-02 | 1,34 | 1,23E-03 | 4,64 | 3,12E-03 | 13 | --- | ncrna:snRNA chromosome:GRCh37:13:73455246:73455352:-1<br>gene:ENSG00000199381                                                                                      |
| 7976874 | 1,14  | 5,60E-01 | 1,23 | 7,00E-02 | 1,39 | 2,13E-03 | 4,24 | 5,13E-03 | 14 | --- | ncrna:snRNA<br>chromosome:GRCh37:14:102269564:102269668:1<br>gene:ENSG00000207208                                                                                  |

|         |       |          |       |          |      |          |      |          |    |     |                                                                                                                                                                                                                                                         |
|---------|-------|----------|-------|----------|------|----------|------|----------|----|-----|---------------------------------------------------------------------------------------------------------------------------------------------------------------------------------------------------------------------------------------------------------|
| 7975770 | 1,11  | 5,33E-02 | -1,00 | 9,91E-01 | 1,11 | 2,94E-02 | 2,62 | 1,79E-02 | 14 | --- | ncrna:snRNA<br>chromosome:GRCh37:14:75487464:75487570:1<br>gene:ENSG00000206924                                                                                                                                                                         |
| 7987066 | 1,11  | 8,81E-01 | 1,61  | 3,71E-02 | 1,79 | 9,31E-03 | 7,08 | 1,19E-02 | 15 | --- | ncrna:snRNA chromosome:GRCh37:15:31248451:31248553:-1<br>gene:ENSG00000212526                                                                                                                                                                           |
| 7983761 | 1,20  | 3,35E-01 | 1,29  | 4,49E-02 | 1,55 | 2,38E-04 | 6,20 | 8,32E-04 | 15 | --- | ncrna:snRNA<br>chromosome:GRCh37:15:52199397:52199502:1<br>gene:ENSG00000202323                                                                                                                                                                         |
| 7989144 | 1,17  | 5,96E-01 | 1,24  | 1,54E-01 | 1,45 | 9,77E-03 | 4,08 | 1,97E-02 | 15 | --- | ncrna:snRNA chromosome:GRCh37:15:56566728:56566834:-1<br>gene:ENSG00000199784                                                                                                                                                                           |
| 7990564 | 1,16  | 5,87E-01 | 1,18  | 2,37E-01 | 1,37 | 1,88E-02 | 5,76 | 3,54E-02 | 15 | --- | ncrna:snRNA chromosome:GRCh37:15:76271133:76271280:-1<br>gene:ENSG00000201630                                                                                                                                                                           |
| 7991171 | 1,06  | 8,40E-01 | 1,23  | 3,84E-02 | 1,30 | 6,97E-03 | 3,90 | 9,60E-03 | 15 | --- | ncrna:snRNA chromosome:GRCh37:15:86194753:86194859:-1<br>gene:ENSG00000202081                                                                                                                                                                           |
| 7996258 | 1,08  | 4,16E-01 | 1,08  | 2,02E-01 | 1,18 | 6,14E-03 | 4,95 | 1,34E-02 | 16 | --- | ncrna:snRNA<br>chromosome:GRCh37:16:59574030:59574170:1<br>gene:ENSG00000200062                                                                                                                                                                         |
| 7993112 | 1,04  | 7,69E-01 | 1,09  | 1,35E-01 | 1,13 | 2,34E-02 | 3,20 | 3,83E-02 | 16 | --- | ncrna:snRNA chromosome:GRCh37:16:6923900:6924006:1<br>gene:ENSG00000200869                                                                                                                                                                              |
| 7997164 | -1,02 | 9,54E-01 | 1,26  | 6,22E-03 | 1,24 | 7,04E-03 | 4,79 | 2,94E-03 | 16 | --- | ncrna:snRNA<br>chromosome:GRCh37:16:71699994:71700100:1<br>gene:ENSG00000199301                                                                                                                                                                         |
| 8013013 | 1,09  | 7,26E-01 | 1,26  | 3,20E-02 | 1,38 | 1,83E-03 | 4,50 | 3,82E-03 | 17 | --- | ncrna:snRNA chromosome:GRCh37:17:16041082:16041186:-1<br>gene:ENSG00000199674                                                                                                                                                                           |
| 8174195 | 1,20  | 2,65E-01 | 1,14  | 2,61E-01 | 1,37 | 4,00E-03 | 6,81 | 8,75E-03 | X  | --- | ncrna:snRNA chromosome:GRCh37:17:46274042:46274148:-1<br>gene:ENSG00000207306                                                                                                                                                                           |
| 8112894 | 1,33  | 2,70E-01 | 1,22  | 2,96E-01 | 1,62 | 5,37E-03 | 5,20 | 1,13E-02 | 5  | --- | ncrna:snRNA chromosome:GRCh37:17:46274042:46274148:-1<br>gene:ENSG00000207306 /// ncrna:snRNA<br>chromosome:GRCh37:5:79661545:79661651:-1<br>gene:ENSG00000206774 /// ncrna:snRNA<br>chromosome:GRCh37:4:54131628:54131734:-1<br>gene:ENSG00000207385   |
| 8128886 | 1,24  | 5,49E-01 | 1,36  | 1,04E-01 | 1,67 | 3,85E-03 | 5,46 | 8,54E-03 | 6  | --- | ncrna:snRNA chromosome:GRCh37:17:46274042:46274148:-1<br>gene:ENSG00000207306 /// ncrna:snRNA<br>chromosome:GRCh37:6:111043453:111043551:-1<br>gene:ENSG00000200522 /// ncrna:snRNA<br>chromosome:GRCh37:2:39111701:39111807:-1<br>gene:ENSG00000207295 |

|         |       |          |       |          |      |          |      |          |    |     |                                                                                                                                                                    |
|---------|-------|----------|-------|----------|------|----------|------|----------|----|-----|--------------------------------------------------------------------------------------------------------------------------------------------------------------------|
| 8008596 | 1,09  | 5,69E-01 | 1,12  | 1,46E-01 | 1,22 | 7,84E-03 | 3,85 | 1,64E-02 | 17 | --- | ncrna:snRNA<br>chromosome:GRCh37:17:53629171:53629281:1<br>gene:ENSG00000200107                                                                                    |
| 8017251 | 1,02  | 9,59E-01 | 1,25  | 2,17E-02 | 1,27 | 1,13E-02 | 4,11 | 9,51E-03 | 17 | --- | ncrna:snRNA chromosome:GRCh37:17:58739694:58739798:-1<br>gene:ENSG00000200013                                                                                      |
| 8018814 | 1,03  | 9,48E-01 | 1,35  | 3,63E-02 | 1,40 | 1,88E-02 | 6,79 | 1,86E-02 | 17 | --- | ncrna:snRNA chromosome:GRCh37:17:75148643:75148756:-1<br>gene:ENSG00000222808                                                                                      |
| 8021372 | 1,03  | 9,56E-01 | 1,32  | 5,00E-02 | 1,36 | 3,24E-02 | 4,49 | 3,15E-02 | 18 | --- | ncrna:snRNA<br>chromosome:GRCh37:18:55422626:55422732:1<br>gene:ENSG00000202159                                                                                    |
| 8046626 | -1,01 | 9,68E-01 | 1,12  | 3,94E-02 | 1,11 | 6,31E-02 | 2,76 | 3,85E-02 | 2  | --- | ncrna:snRNA<br>chromosome:GRCh37:2:178903629:178903731:1<br>gene:ENSG00000206788                                                                                   |
| 8048993 | 1,14  | 3,58E-01 | 1,13  | 2,28E-01 | 1,29 | 5,46E-03 | 2,85 | 1,21E-02 | 2  | --- | ncrna:snRNA<br>chromosome:GRCh37:2:231616856:231616962:1<br>gene:ENSG00000201044                                                                                   |
| 8049042 | 1,05  | 8,66E-01 | 1,17  | 9,95E-02 | 1,22 | 3,08E-02 | 3,76 | 4,24E-02 | 2  | --- | ncrna:snRNA<br>chromosome:GRCh37:2:231998176:231998344:1<br>gene:ENSG00000201574                                                                                   |
| 8040576 | 1,28  | 1,26E-01 | 1,22  | 1,22E-01 | 1,57 | 2,33E-04 | 5,79 | 8,04E-04 | 2  | --- | ncrna:snRNA chromosome:GRCh37:2:24899178:24899284:1<br>gene:ENSG00000206732                                                                                        |
| 8040630 | 1,01  | 9,90E-01 | 1,37  | 4,74E-02 | 1,38 | 4,48E-02 | 3,93 | 3,59E-02 | 2  | --- | ncrna:snRNA chromosome:GRCh37:2:26265544:26265650:1<br>gene:ENSG00000199872                                                                                        |
| 8051394 | 1,11  | 6,18E-01 | 1,24  | 3,84E-02 | 1,38 | 1,24E-03 | 4,82 | 3,01E-03 | 2  | --- | ncrna:snRNA chromosome:GRCh37:2:32439525:32439631:-1<br>gene:ENSG00000201113                                                                                       |
| 8041568 | 1,06  | 5,49E-01 | 1,06  | 3,09E-01 | 1,12 | 2,62E-02 | 2,64 | 4,65E-02 | 2  | --- | ncrna:snRNA chromosome:GRCh37:2:39309730:39309833:1<br>gene:ENSG00000206985                                                                                        |
| 8052231 | 1,30  | 4,33E-01 | 1,43  | 7,75E-02 | 1,86 | 1,30E-03 | 5,10 | 3,56E-03 | 2  | --- | ncrna:snRNA chromosome:GRCh37:2:55241554:55241656:-1<br>gene:ENSG00000200086                                                                                       |
| 8065853 | 1,17  | 3,24E-01 | 1,11  | 3,73E-01 | 1,30 | 1,26E-02 | 3,34 | 2,31E-02 | 20 | --- | ncrna:snRNA chromosome:GRCh37:20:33618120:33618219:-1<br>gene:ENSG00000202150                                                                                      |
| 8069517 | 1,01  | 9,69E-01 | 1,20  | 4,69E-02 | 1,21 | 3,49E-02 | 5,28 | 3,12E-02 | 21 | --- | ncrna:snRNA chromosome:GRCh37:21:15340810:15340916:-1<br>gene:ENSG00000223287 /// ncrna:snRNA<br>chromosome:GRCh37:13:19443325:19443431:-1<br>gene:ENSG00000223024 |
| 8069444 | 1,36  | 3,32E-02 | -1,08 | 6,18E-01 | 1,26 | 8,94E-02 | 4,00 | 1,99E-02 | 21 | --- | ncrna:snRNA<br>chromosome:GRCh37:21:47945531:47945635:1<br>gene:ENSG00000202239                                                                                    |

|         |       |          |       |          |      |          |       |          |    |     |                                                                                                                                                                       |
|---------|-------|----------|-------|----------|------|----------|-------|----------|----|-----|-----------------------------------------------------------------------------------------------------------------------------------------------------------------------|
| 8075306 | -1,00 | 9,94E-01 | 1,15  | 5,11E-02 | 1,15 | 6,47E-02 | 5,66  | 4,77E-02 | 22 | --- | ncrna:snRNA chromosome:GRCh37:22:30295576:30295682:-1<br>gene:ENSG00000207455                                                                                         |
| 8075479 | -1,01 | 9,85E-01 | 1,39  | 5,00E-02 | 1,37 | 7,22E-02 | 4,20  | 4,93E-02 | 22 | --- | ncrna:snRNA chromosome:GRCh37:22:31618731:31618839:-1<br>gene:ENSG00000199695                                                                                         |
| 8089928 | 1,12  | 5,49E-01 | 1,31  | 9,29E-03 | 1,47 | 6,40E-05 | 10,07 | 1,78E-04 | 3  | --- | ncrna:snRNA<br>chromosome:GRCh37:3:121374316:121374451:-1<br>gene:ENSG00000222057                                                                                     |
| 8090934 | 1,04  | 9,08E-01 | 1,30  | 1,71E-02 | 1,35 | 4,63E-03 | 5,33  | 4,91E-03 | 3  | --- | ncrna:snRNA<br>chromosome:GRCh37:3:136148919:136149025:-1<br>gene:ENSG00000200571                                                                                     |
| 8083144 | 1,15  | 2,23E-02 | -1,03 | 6,64E-01 | 1,12 | 5,33E-02 | 2,75  | 1,21E-02 | 3  | --- | ncrna:snRNA<br>chromosome:GRCh37:3:141864296:141864397:1<br>gene:ENSG00000206604                                                                                      |
| 8093126 | -1,01 | 9,84E-01 | 1,48  | 4,22E-03 | 1,46 | 2,75E-03 | 5,96  | 1,36E-03 | 3  | --- | ncrna:snRNA<br>chromosome:GRCh37:3:196120579:196120683:-1<br>gene:ENSG00000206644                                                                                     |
| 8097116 | 1,15  | 7,34E-01 | 1,37  | 6,67E-02 | 1,57 | 6,82E-03 | 5,30  | 1,19E-02 | 4  | --- | ncrna:snRNA<br>chromosome:GRCh37:4:120288717:120288874:1<br>gene:ENSG00000201186 /// ncrna:snRNA<br>chromosome:GRCh37:4:166173732:166173889:1<br>gene:ENSG00000200974 |
| 8098193 | 1,02  | 9,73E-01 | 1,42  | 5,86E-02 | 1,46 | 5,02E-02 | 5,61  | 4,48E-02 | 4  | --- | ncrna:snRNA<br>chromosome:GRCh37:4:166173732:166173889:1<br>gene:ENSG00000200974                                                                                      |
| 8093683 | 1,10  | 4,75E-01 | 1,13  | 1,14E-01 | 1,24 | 2,94E-03 | 4,93  | 7,02E-03 | 4  | --- | ncrna:snRNA chromosome:GRCh37:4:3045828:3045934:1<br>gene:ENSG00000199335                                                                                             |
| 8094739 | 1,10  | 6,06E-01 | 1,15  | 1,37E-01 | 1,27 | 8,57E-03 | 4,29  | 1,74E-02 | 4  | --- | ncrna:snRNA chromosome:GRCh37:4:40079494:40079602:1<br>gene:ENSG00000200455                                                                                           |
| 8100227 | 1,26  | 4,78E-01 | 1,20  | 3,57E-01 | 1,50 | 2,49E-02 | 5,78  | 4,41E-02 | 4  | --- | ncrna:snRNA chromosome:GRCh37:4:48108098:48108205:-1<br>gene:ENSG00000200269                                                                                          |
| 8107348 | 1,07  | 7,53E-01 | 1,15  | 1,15E-01 | 1,23 | 1,59E-02 | 5,16  | 2,71E-02 | 5  | --- | ncrna:snRNA<br>chromosome:GRCh37:5:112114060:112114166:1<br>gene:ENSG00000212370                                                                                      |
| 8111358 | 1,17  | 8,52E-02 | -1,00 | 9,83E-01 | 1,17 | 4,70E-02 | 3,49  | 3,00E-02 | 5  | --- | ncrna:snRNA chromosome:GRCh37:5:32234872:32234981:-1<br>gene:ENSG00000199731                                                                                          |
| 8112041 | 1,00  | 9,95E-01 | 1,17  | 1,27E-02 | 1,18 | 8,96E-03 | 5,98  | 5,45E-03 | 5  | --- | ncrna:snRNA chromosome:GRCh37:5:53207850:53207953:-1<br>gene:ENSG00000222960                                                                                          |
| 8105577 | 1,08  | 6,16E-01 | 1,11  | 1,73E-01 | 1,21 | 1,30E-02 | 3,69  | 2,56E-02 | 5  | --- | ncrna:snRNA chromosome:GRCh37:5:61739003:61739109:1<br>gene:ENSG00000199279                                                                                           |

|         |       |          |       |          |      |          |      |          |   |     |                                                                                   |
|---------|-------|----------|-------|----------|------|----------|------|----------|---|-----|-----------------------------------------------------------------------------------|
| 8129899 | 1,07  | 7,76E-01 | 1,21  | 4,47E-02 | 1,30 | 4,78E-03 | 3,04 | 8,26E-03 | 6 | --- | ncrna:snRNA<br>chromosome:GRCh37:6:139180164:139180270:-1<br>gene:ENSG00000206856 |
| 8130011 | 1,04  | 7,71E-01 | 1,08  | 1,54E-01 | 1,12 | 2,89E-02 | 3,44 | 4,66E-02 | 6 | --- | ncrna:snRNA<br>chromosome:GRCh37:6:145784374:145784535:-1<br>gene:ENSG00000201119 |
| 8130181 | 1,12  | 6,37E-01 | 1,16  | 1,96E-01 | 1,31 | 1,78E-02 | 4,35 | 3,35E-02 | 6 | --- | ncrna:snRNA<br>chromosome:GRCh37:6:150647759:150647899:-1<br>gene:ENSG00000201628 |
| 8117018 | 1,72  | 6,41E-02 | 1,90  | 1,18E-02 | 3,27 | 3,00E-06 | 5,48 | 1,36E-05 | 6 | --- | ncrna:snRNA chromosome:GRCh37:6:15315151:15315257:1<br>gene:ENSG00000201367       |
| 8119235 | 1,10  | 6,40E-01 | 1,26  | 2,18E-02 | 1,39 | 5,32E-04 | 5,76 | 1,33E-03 | 6 | --- | ncrna:snRNA chromosome:GRCh37:6:37883372:37883518:1<br>gene:ENSG00000200597       |
| 8120600 | 1,03  | 8,54E-01 | 1,12  | 6,67E-02 | 1,15 | 1,66E-02 | 4,69 | 2,35E-02 | 6 | --- | ncrna:snRNA chromosome:GRCh37:6:71892315:71892421:1<br>gene:ENSG00000207180       |
| 8127658 | 1,00  | 9,94E-01 | 1,12  | 3,09E-02 | 1,12 | 2,89E-02 | 7,02 | 2,12E-02 | 6 | --- | ncrna:snRNA chromosome:GRCh37:6:76183454:76183610:-1<br>gene:ENSG00000201291      |
| 8127822 | 1,22  | 3,78E-02 | -1,00 | 9,99E-01 | 1,22 | 1,88E-02 | 4,77 | 1,11E-02 | 6 | --- | ncrna:snRNA chromosome:GRCh37:6:82920055:82920153:-1<br>gene:ENSG00000223044      |
| 8142979 | -1,03 | 9,08E-01 | 1,17  | 2,82E-02 | 1,14 | 7,84E-02 | 7,49 | 3,27E-02 | 7 | --- | ncrna:snRNA<br>chromosome:GRCh37:7:130739645:130739751:-1<br>gene:ENSG00000199627 |
| 8143365 | 1,16  | 3,58E-01 | 1,16  | 1,63E-01 | 1,34 | 2,94E-03 | 3,60 | 7,06E-03 | 7 | --- | ncrna:snRNA<br>chromosome:GRCh37:7:139909363:139909471:-1<br>gene:ENSG00000199971 |
| 8138795 | 1,05  | 6,62E-01 | 1,09  | 1,17E-01 | 1,15 | 9,09E-03 | 2,60 | 1,79E-02 | 7 | --- | ncrna:snRNA chromosome:GRCh37:7:28157732:28157838:-1<br>gene:ENSG00000206623      |
| 8148309 | 1,18  | 3,02E-01 | 1,12  | 3,46E-01 | 1,32 | 9,28E-03 | 4,55 | 1,79E-02 | 8 | --- | ncrna:snRNA<br>chromosome:GRCh37:8:126913195:126913298:1<br>gene:ENSG00000206695  |
| 8144512 | 1,10  | 5,69E-02 | 1,07  | 1,38E-01 | 1,18 | 9,20E-05 | 2,81 | 3,44E-04 | 8 | --- | ncrna:snRNA chromosome:GRCh37:8:8753323:8753428:1<br>gene:ENSG00000200713         |
| 8163147 | -1,03 | 8,92E-01 | 1,15  | 3,45E-02 | 1,12 | 1,12E-01 | 5,41 | 4,40E-02 | 9 | --- | ncrna:snRNA<br>chromosome:GRCh37:9:111958481:111958589:-1<br>gene:ENSG00000200106 |
| 8154572 | 1,02  | 9,20E-01 | 1,12  | 5,95E-02 | 1,14 | 2,88E-02 | 3,11 | 3,21E-02 | 9 | --- | ncrna:snRNA chromosome:GRCh37:9:20418319:20418434:1<br>gene:ENSG00000222202       |
| 8174646 | 1,05  | 7,74E-01 | 1,11  | 1,15E-01 | 1,16 | 1,88E-02 | 4,08 | 3,14E-02 | X | --- | ncrna:snRNA<br>chromosome:GRCh37:X:115532007:115532113:-1                         |

|         |       |          |       |          |       |          |       |          |    |                | gene:ENSG00000207033                                                      |
|---------|-------|----------|-------|----------|-------|----------|-------|----------|----|----------------|---------------------------------------------------------------------------|
| 8172305 | 1,31  | 1,01E-01 | 1,27  | 7,52E-02 | 1,66  | 6,80E-05 | 3,09  | 2,85E-04 | X  | ---            | ncrna:snRNA chromosome:GRCh37:X:47211242:47211348:-1 gene:ENSG00000201450 |
| 7977621 | 1,00  | 9,95E-01 | -1,16 | 2,48E-02 | -1,15 | 2,70E-02 | 7,53  | 1,76E-02 | 14 | <i>NDRG2</i>   | NDRG family member 2                                                      |
| 8066051 | 1,08  | 5,20E-01 | -1,16 | 1,41E-02 | -1,08 | 2,76E-01 | 9,22  | 2,06E-02 | 20 | <i>NDRG3</i>   | NDRG family member 3                                                      |
| 7898337 | -1,02 | 9,18E-01 | -1,13 | 2,12E-02 | -1,15 | 6,73E-03 | 10,02 | 6,67E-03 | 1  | <i>NECAP2</i>  | NECAP endocytosis associated 2                                            |
| 7986969 | -1,00 | 9,95E-01 | -1,12 | 4,16E-02 | -1,12 | 4,27E-02 | 7,46  | 3,23E-02 | 15 | <i>NDNL2</i>   | necdin-like 2                                                             |
| 8037913 | 1,12  | 5,05E-01 | -1,29 | 9,29E-03 | -1,15 | 1,89E-01 | 9,20  | 1,08E-02 | 19 | <i>NAPA</i>    | N-ethylmaleimide-sensitive factor attachment protein, alpha               |
| 7985983 | 1,06  | 6,44E-01 | -1,16 | 1,66E-02 | -1,09 | 2,20E-01 | 7,22  | 2,60E-02 | 15 | <i>NGRN</i>    | neugrin, neurite outgrowth associated                                     |
| 7943892 | 1,56  | 2,44E-02 | -1,21 | 3,30E-01 | 1,29  | 2,11E-01 | 7,07  | 1,93E-02 | 11 | <i>NCAM1</i>   | neural cell adhesion molecule 1                                           |
| 7918813 | -1,05 | 7,02E-01 | -1,08 | 1,23E-01 | -1,14 | 1,27E-02 | 9,95  | 2,33E-02 | 1  | <i>NRAS</i>    | neuroblastoma RAS viral (v-ras) oncogene homolog                          |
| 8152119 | 1,43  | 5,19E-03 | -1,28 | 4,01E-02 | 1,12  | 4,82E-01 | 7,46  | 3,01E-03 | 8  | <i>NCALD</i>   | neurocalcin delta                                                         |
| 7925954 | -1,11 | 3,56E-01 | -1,08 | 3,16E-01 | -1,19 | 1,04E-02 | 6,75  | 2,05E-02 | 10 | <i>NET1</i>    | neuroepithelial cell transforming 1                                       |
| 8059720 | 1,50  | 2,23E-02 | -1,26 | 1,64E-01 | 1,19  | 3,98E-01 | 7,66  | 1,71E-02 | 2  | <i>NMUR1</i>   | neuromedin U receptor 1                                                   |
| 8007197 | -1,02 | 9,29E-01 | -1,15 | 5,67E-02 | -1,18 | 2,90E-02 | 8,35  | 3,14E-02 | 17 | <i>NKIRAS2</i> | NFKB inhibitor interacting Ras-like 2                                     |
| 8085852 | 1,08  | 6,07E-01 | 1,08  | 2,72E-01 | 1,17  | 2,75E-02 | 8,17  | 4,90E-02 | 3  | <i>NGLY1</i>   | N-glycanase 1                                                             |
| 7906576 | -1,06 | 6,99E-01 | -1,11 | 1,32E-01 | -1,18 | 1,36E-02 | 9,46  | 2,55E-02 | 1  | <i>NCSTN</i>   | nicastatin                                                                |
| 8022531 | 1,25  | 3,66E-02 | -1,15 | 1,58E-01 | 1,09  | 5,08E-01 | 8,86  | 2,60E-02 | 18 | <i>NPC1</i>    | Niemann-Pick disease, type C1                                             |
| 7960253 | 1,18  | 1,19E-01 | -1,25 | 1,18E-02 | -1,06 | 6,83E-01 | 7,89  | 1,01E-02 | 12 | <i>NINJ2</i>   | ninjurin 2                                                                |
| 8151952 | -1,04 | 8,82E-01 | -1,20 | 4,12E-02 | -1,25 | 1,10E-02 | 7,51  | 1,41E-02 | 8  | <i>NIPAL2</i>  | NIPA-like domain containing 2                                             |
| 7998983 | 1,17  | 4,88E-02 | -1,11 | 1,47E-01 | 1,05  | 6,05E-01 | 7,29  | 3,47E-02 | 16 | <i>NLRC3</i>   | NLR family, CARD domain containing 3                                      |
| 8007715 | 1,03  | 8,97E-01 | -1,15 | 3,79E-02 | -1,12 | 1,19E-01 | 8,51  | 4,92E-02 | 17 | <i>NMT1</i>    | N-myristoyltransferase 1                                                  |
| 8059071 | 1,05  | 7,81E-01 | -1,17 | 1,42E-02 | -1,12 | 9,31E-02 | 8,02  | 1,79E-02 | 2  | <i>NHEJ1</i>   | nonhomologous end-joining factor 1                                        |
| 8168280 | 1,06  | 5,86E-01 | -1,16 | 1,11E-02 | -1,09 | 1,69E-01 | 9,97  | 1,39E-02 | X  | <i>NONO</i>    | non-POU domain containing, octamer-binding                                |

|         |       |          |       |          |       |          |       |          |    |                   |                                                                           |
|---------|-------|----------|-------|----------|-------|----------|-------|----------|----|-------------------|---------------------------------------------------------------------------|
| 8043363 | 1,42  | 9,62E-02 | 1,17  | 4,08E-01 | 1,66  | 2,32E-03 | 5,64  | 4,60E-03 | 2  | <i>NCRNA00152</i> | non-protein coding RNA 152                                                |
| 7925561 | 1,16  | 5,94E-01 | 1,22  | 1,68E-01 | 1,41  | 1,10E-02 | 7,80  | 2,21E-02 | 1  | <i>NCRNA00201</i> | non-protein coding RNA 201                                                |
| 7960575 | 1,10  | 3,81E-01 | -1,16 | 2,93E-02 | -1,05 | 5,88E-01 | 7,68  | 4,42E-02 | 12 | <i>NOP2</i>       | NOP2 nucleolar protein homolog (yeast)                                    |
| 8060484 | 1,06  | 6,48E-01 | -1,15 | 2,66E-02 | -1,08 | 3,03E-01 | 7,23  | 4,41E-02 | 20 | <i>NOP56</i>      | NOP56 ribonucleoprotein homolog (yeast)                                   |
| 7904702 | 1,08  | 5,68E-01 | 1,12  | 1,08E-01 | 1,21  | 4,57E-03 | 10,71 | 9,98E-03 | 1  | <i>NOTCH2NL</i>   | Notch homolog 2 (Drosophila) N-terminal like                              |
| 8064438 | -1,10 | 2,39E-01 | -1,02 | 7,20E-01 | -1,12 | 3,96E-02 | 9,10  | 4,83E-02 | 20 | <i>NSFL1C</i>     | NSFL1 (p97) cofactor (p47)                                                |
| 8008087 | -1,04 | 8,24E-01 | -1,14 | 2,96E-02 | -1,19 | 3,95E-03 | 8,27  | 5,88E-03 | 17 | <i>NFE2L1</i>     | nuclear factor (erythroid-derived 2)-like 1                               |
| 8067040 | 1,27  | 4,93E-02 | -1,22 | 5,45E-02 | 1,03  | 8,71E-01 | 9,07  | 2,32E-02 | 20 | <i>NFATC2</i>     | nuclear factor of activated T-cells, cytoplasmic, calcineurin-dependent 2 |
| 8096635 | -1,13 | 4,37E-02 | 1,01  | 8,83E-01 | -1,12 | 4,27E-02 | 9,44  | 1,92E-02 | 4  | <i>NFKB1</i>      | nuclear factor of kappa light polypeptide gene enhancer in B-cells 1      |
| 8000131 | 1,12  | 2,50E-01 | 1,05  | 5,67E-01 | 1,17  | 2,13E-02 | 11,65 | 3,21E-02 | 16 | <i>NPIPL3</i>     | nuclear pore complex interacting protein-like 3                           |
| 7960331 | 1,02  | 9,38E-01 | 1,15  | 3,39E-02 | 1,17  | 1,50E-02 | 5,59  | 1,54E-02 | 12 | <i>NRIP2</i>      | nuclear receptor interacting protein 2                                    |
| 7911359 | 1,10  | 3,53E-01 | -1,19 | 7,12E-03 | -1,09 | 2,49E-01 | 8,15  | 7,96E-03 | 1  | <i>NOC2L</i>      | nucleolar complex associated 2 homolog ( <i>S. cerevisiae</i> )           |
| 8160682 | 1,06  | 6,96E-01 | -1,18 | 1,27E-02 | -1,11 | 1,36E-01 | 6,90  | 1,73E-02 | 9  | <i>NOL6</i>       | nucleolar protein family 6 (RNA-associated)                               |
| 8158446 | 1,12  | 1,99E-01 | -1,15 | 3,49E-02 | -1,02 | 8,45E-01 | 7,93  | 3,74E-02 | 9  | <i>NUP188</i>     | nucleoporin 188kDa                                                        |
| 7973826 | 1,20  | 8,13E-02 | 1,01  | 9,59E-01 | 1,21  | 3,31E-02 | 5,21  | 2,39E-02 | 14 | <i>NUBPL</i>      | nucleotide binding protein-like                                           |
| 7993467 | -1,05 | 7,09E-01 | -1,09 | 1,65E-01 | -1,15 | 2,15E-02 | 9,27  | 3,79E-02 | 16 | <i>NDE1</i>       | nudE nuclear distribution gene E homolog 1 ( <i>A. nidulans</i> )         |
| 7934299 | 1,03  | 9,20E-01 | 1,16  | 5,85E-02 | 1,19  | 2,82E-02 | 6,41  | 3,12E-02 | 10 | <i>NUDT13</i>     | nudix (nucleoside diphosphate linked moiety X)-type motif 13              |
| 8179683 | -1,08 | 6,80E-01 | -1,13 | 1,57E-01 | -1,22 | 1,59E-02 | 7,91  | 2,92E-02 | 6  | <i>NRM</i>        | nurim (nuclear envelope membrane protein)                                 |
| 7911231 | -1,00 | 9,98E-01 | -1,56 | 1,10E-02 | -1,56 | 6,97E-03 | 9,47  | 4,20E-03 | 1  | <i>OR2W3</i>      | olfactory receptor, family 2, subfamily W, member 3                       |
| 7937942 | 1,28  | 2,46E-01 | 1,17  | 3,23E-01 | 1,50  | 5,57E-03 | 6,24  | 1,14E-02 | 11 | <i>OR52K1</i>     | olfactory receptor, family 52, subfamily K, member 1                      |
| 7959294 | 1,08  | 4,35E-01 | -1,16 | 1,03E-02 | -1,08 | 2,54E-01 | 8,60  | 1,26E-02 | 12 | <i>ORAI1</i>      | ORAI calcium release-activated calcium modulator 1                        |
| 8014916 | 1,16  | 1,04E-01 | -1,16 | 5,38E-02 | 1,01  | 9,74E-01 | 7,93  | 3,59E-02 | 17 | <i>ORMDL3</i>     | ORM1-like 3 ( <i>S. cerevisiae</i> )                                      |
| 8157450 | 1,12  | 5,02E-01 | 1,17  | 1,06E-01 | 1,31  | 2,95E-03 | 5,91  | 7,06E-03 | 9  | <i>ORM2</i>       | orosomucoid 2                                                             |

|         |       |          |       |          |       |          |       |          |    |                 |                                                          |
|---------|-------|----------|-------|----------|-------|----------|-------|----------|----|-----------------|----------------------------------------------------------|
| 8147262 | 1,20  | 2,62E-02 | 1,01  | 9,15E-01 | 1,21  | 7,77E-03 | 7,62  | 5,13E-03 | 8  | <i>OTUD6B</i>   | OTU domain containing 6B                                 |
| 7917433 | 1,20  | 9,08E-02 | -1,01 | 9,24E-01 | 1,18  | 6,71E-02 | 6,32  | 3,74E-02 | 1  | <i>ODF2L</i>    | outer dense fiber of sperm tails 2-like                  |
| 7908861 | 1,51  | 1,77E-01 | 1,67  | 2,68E-02 | 2,52  | 2,90E-05 | 7,67  | 1,40E-04 | 1  | <i>OCR1</i>     | ovarian cancer-related protein 1                         |
| 7973314 | -1,02 | 9,06E-01 | -1,12 | 7,99E-02 | -1,14 | 3,52E-02 | 10,63 | 4,20E-02 | 14 | <i>OXA1L</i>    | oxidase (cytochrome c) assembly 1-like                   |
| 8138613 | 1,21  | 6,15E-02 | -1,01 | 9,43E-01 | 1,20  | 4,27E-02 | 7,02  | 2,32E-02 | 7  | <i>OSBPL3</i>   | oxysterol binding protein-like 3                         |
| 7945831 | 1,45  | 5,52E-03 | -1,27 | 6,19E-02 | 1,15  | 3,88E-01 | 7,28  | 3,70E-03 | 11 | <i>OSBPL5</i>   | oxysterol binding protein-like 5                         |
| 8134789 | 1,16  | 1,17E-02 | -1,11 | 5,81E-02 | 1,05  | 5,68E-01 | 8,86  | 7,27E-03 | 7  | <i>PILRB</i>    | paired immunoglobulin-like type 2 receptor beta          |
| 7915286 | -1,08 | 8,02E-01 | -1,19 | 1,22E-01 | -1,27 | 2,56E-02 | 11,37 | 3,94E-02 | 1  | <i>PPT1</i>     | palmitoyl-protein thioesterase 1                         |
| 8162533 | 1,38  | 7,32E-02 | -1,30 | 8,47E-02 | 1,06  | 8,44E-01 | 7,50  | 3,58E-02 | 9  | <i>PTCH1</i>    | patched homolog 1 (Drosophila)                           |
| 8063097 | 1,04  | 7,72E-01 | -1,14 | 1,57E-02 | -1,10 | 1,14E-01 | 8,45  | 2,11E-02 | 20 | <i>PCIF1</i>    | PDX1 C-terminal inhibiting factor 1                      |
| 8175860 | 1,30  | 8,56E-02 | -1,23 | 1,22E-01 | 1,06  | 7,78E-01 | 6,46  | 4,95E-02 | X  | <i>PDZD4</i>    | PDZ domain containing 4                                  |
| 7915910 | 1,01  | 9,88E-01 | -1,47 | 2,42E-02 | -1,45 | 2,89E-02 | 9,84  | 1,78E-02 | 1  | <i>PDZK1IP1</i> | PDZK1 interacting protein 1                              |
| 8067978 | 1,11  | 4,87E-02 | -1,13 | 1,41E-02 | -1,01 | 9,02E-01 | 10,60 | 8,43E-03 | 7  | <i>PPIA</i>     | peptidylprolyl isomerase A (cyclophilin A)               |
| 7919162 | 1,09  | 7,39E-01 | 1,18  | 1,43E-01 | 1,29  | 2,07E-02 | 7,34  | 3,53E-02 | 1  | <i>PPIALAB</i>  | peptidylprolyl isomerase A (cyclophilin A)-like 4B       |
| 7919407 | 1,10  | 5,37E-01 | 1,12  | 2,21E-01 | 1,23  | 1,30E-02 | 5,79  | 2,60E-02 | 1  | <i>PPIALAB</i>  | peptidylprolyl isomerase A (cyclophilin A)-like 4B       |
| 7900354 | 1,13  | 1,06E-01 | -1,12 | 6,75E-02 | 1,01  | 9,41E-01 | 7,34  | 4,17E-02 | 1  | <i>PPIE</i>     | peptidylprolyl isomerase E (cyclophilin E)               |
| 7934161 | 1,76  | 2,66E-03 | -1,39 | 4,93E-02 | 1,26  | 2,38E-01 | 10,57 | 1,03E-03 | 10 | <i>PRF1</i>     | perforin 1 (pore forming protein)                        |
| 7911720 | 1,00  | 9,96E-01 | -1,11 | 3,62E-02 | -1,11 | 4,00E-02 | 6,87  | 2,78E-02 | 1  | <i>PEX10</i>    | peroxisomal biogenesis factor 10                         |
| 7921571 | -1,00 | 9,95E-01 | -1,17 | 1,17E-02 | -1,17 | 7,52E-03 | 8,03  | 4,69E-03 | 1  | <i>PEX19</i>    | peroxisomal biogenesis factor 19                         |
| 8075406 | 1,02  | 9,15E-01 | -1,13 | 1,65E-02 | -1,11 | 4,06E-02 | 6,93  | 1,54E-02 | 22 | <i>PESI</i>     | pescadillo homolog 1, containing BRCT domain (zebrafish) |
| 8081348 | -1,06 | 7,09E-01 | -1,11 | 1,24E-01 | -1,17 | 1,37E-02 | 10,09 | 2,55E-02 | 3  | <i>PCNP</i>     | PEST proteolytic signal containing nuclear protein       |
| 7971563 | -1,02 | 9,19E-01 | -1,14 | 4,35E-02 | -1,16 | 1,79E-02 | 9,83  | 1,97E-02 | 3  | <i>PCNP</i>     | PEST proteolytic signal containing nuclear protein       |
| 8134098 | -1,04 | 9,00E-01 | 1,29  | 9,29E-03 | 1,24  | 2,14E-02 | 7,86  | 6,37E-03 | 7  | <i>PFTK1</i>    | PFTAIRE protein kinase 1                                 |



|         |       |          |       |          |       |          |       |          |    |                 |                                                                                                      |
|---------|-------|----------|-------|----------|-------|----------|-------|----------|----|-----------------|------------------------------------------------------------------------------------------------------|
| 8080306 | -1,03 | 8,79E-01 | -1,15 | 3,51E-02 | -1,18 | 8,54E-03 | 6,12  | 1,07E-02 | 3  | <i>PHF7</i>     | PHD finger protein 7                                                                                 |
| 7899455 | 1,03  | 8,88E-01 | -1,17 | 1,75E-02 | -1,14 | 5,88E-02 | 8,95  | 1,97E-02 | 1  | <i>PHACTR4</i>  | phosphatase and actin regulator 4                                                                    |
| 8013641 | 1,03  | 8,68E-01 | -1,15 | 1,57E-02 | -1,11 | 5,94E-02 | 9,19  | 1,73E-02 | 17 | <i>PIGS</i>     | phosphatidylinositol glycan anchor biosynthesis, class S                                             |
| 8062981 | 1,10  | 2,78E-01 | -1,14 | 3,62E-02 | -1,03 | 7,56E-01 | 8,81  | 4,65E-02 | 20 | <i>PIGT</i>     | phosphatidylinositol glycan anchor biosynthesis, class T                                             |
| 8065762 | 1,06  | 6,84E-01 | -1,22 | 3,68E-03 | -1,15 | 3,59E-02 | 8,09  | 3,06E-03 | 20 | <i>PIGU</i>     | phosphatidylinositol glycan anchor biosynthesis, class U                                             |
| 8147447 | -1,00 | 9,86E-01 | -1,16 | 1,27E-02 | -1,16 | 7,79E-03 | 9,81  | 5,13E-03 | 8  | <i>PTDSS1</i>   | phosphatidylserine synthase 1                                                                        |
| 7904965 | 1,26  | 1,31E-01 | 1,33  | 2,15E-02 | 1,67  | 1,30E-05 | 6,42  | 8,32E-05 | 1  | <i>PDE4DIP</i>  | phosphodiesterase 4D interacting protein                                                             |
| 8112220 | 1,28  | 1,03E-02 | -1,09 | 4,00E-01 | 1,18  | 7,83E-02 | 7,63  | 6,67E-03 | 5  | <i>PDE4D</i>    | phosphodiesterase 4D, cAMP-specific (phosphodiesterase E3 duncce homolog, <i>Drosophila</i> )        |
| 7934271 | -1,10 | 2,27E-01 | 1,14  | 1,99E-02 | 1,04  | 6,68E-01 | 5,90  | 2,43E-02 | 10 | <i>PLA2G12B</i> | phospholipase A2, group XIIIB                                                                        |
| 8060854 | 1,25  | 6,99E-02 | -1,03 | 8,27E-01 | 1,21  | 7,91E-02 | 7,19  | 3,38E-02 | 20 | <i>PLCB1</i>    | phospholipase C, beta 1 (phosphoinositide-specific)                                                  |
| 8169240 | 1,06  | 6,90E-01 | -1,25 | 1,74E-03 | -1,17 | 1,74E-02 | 8,09  | 1,30E-03 | X  | <i>PRPS1</i>    | phosphoribosyl pyrophosphate synthetase 1                                                            |
| 8166049 | -1,04 | 8,47E-01 | -1,15 | 3,60E-02 | -1,19 | 6,65E-03 | 8,50  | 8,75E-03 | X  | <i>PRPS2</i>    | phosphoribosyl pyrophosphate synthetase 2                                                            |
| 8095221 | -1,03 | 9,15E-01 | -1,19 | 2,48E-02 | -1,22 | 8,17E-03 | 7,61  | 8,53E-03 | 4  | <i>PAICS</i>    | phosphoribosylaminoimidazole carboxylase, phosphoribosylaminoimidazole succinocarboxamide synthetase |
| 8061447 | 1,07  | 6,77E-01 | -1,18 | 2,38E-02 | -1,10 | 2,56E-01 | 8,48  | 3,77E-02 | 20 | <i>PYGB</i>     | phosphorylase, glycogen; brain                                                                       |
| 8094596 | 1,19  | 5,77E-01 | 1,37  | 5,15E-02 | 1,63  | 1,50E-03 | 5,60  | 3,76E-03 | 4  | <i>PTTG2</i>    | pituitary tumor-transforming 2                                                                       |
| 8101429 | 1,18  | 3,42E-02 | -1,17 | 2,84E-02 | 1,01  | 9,34E-01 | 11,24 | 1,15E-02 | 4  | <i>PLAC8</i>    | placenta-specific 8                                                                                  |
| 7951351 | 1,56  | 1,60E-02 | -1,27 | 1,70E-01 | 1,23  | 3,30E-01 | 7,20  | 1,27E-02 | 11 | <i>PDGFD</i>    | platelet derived growth factor D                                                                     |
| 7913883 | 1,25  | 4,74E-02 | -1,13 | 2,43E-01 | 1,11  | 4,40E-01 | 7,66  | 3,74E-02 | 1  | <i>PAFAH2</i>   | platelet-activating factor acetylhydrolase 2, 40kDa                                                  |
| 8081590 | 1,41  | 5,19E-03 | -1,15 | 2,45E-01 | 1,23  | 9,77E-02 | 5,29  | 3,79E-03 | 3  | <i>PHLDB2</i>   | pleckstrin homology-like domain, family B, member 2                                                  |
| 7907024 | 1,01  | 9,51E-01 | -1,11 | 4,39E-02 | -1,10 | 8,82E-02 | 8,02  | 4,85E-02 | 1  | <i>POGK</i>     | pogo transposable element with KRAB domain                                                           |
| 8134777 | 1,23  | 4,21E-02 | -1,14 | 1,40E-01 | 1,07  | 5,91E-01 | 8,83  | 3,00E-02 | 7  | <i>PVRIG</i>    | poliovirus receptor related immunoglobulin domain containing                                         |
| 8082086 | 1,35  | 4,32E-02 | -1,17 | 2,75E-01 | 1,16  | 3,72E-01 | 8,44  | 3,50E-02 | 3  | <i>PARP15</i>   | poly (ADP-ribose) polymerase family, member 15                                                       |

|         |       |          |       |          |       |          |       |          |    |                                                          |                                                                                 |
|---------|-------|----------|-------|----------|-------|----------|-------|----------|----|----------------------------------------------------------|---------------------------------------------------------------------------------|
| 7941214 | 1,10  | 1,96E-01 | -1,17 | 4,54E-03 | -1,07 | 3,21E-01 | 7,08  | 4,44E-03 | 11 | <i>POLA2</i>                                             | polymerase (DNA directed), alpha 2 (70kD subunit)                               |
| 8139299 | 1,02  | 9,42E-01 | -1,17 | 1,57E-02 | -1,15 | 2,94E-02 | 7,55  | 1,25E-02 | 7  | <i>POLD2</i>                                             | polymerase (DNA directed), delta 2, regulatory subunit 50kDa                    |
| 8163525 | -1,02 | 9,17E-01 | -1,12 | 4,68E-02 | -1,14 | 1,91E-02 | 7,76  | 2,16E-02 | 9  | <i>POLE3</i>                                             | polymerase (DNA directed), epsilon 3 (p17 subunit)                              |
| 8013588 | 1,02  | 8,96E-01 | -1,17 | 1,58E-03 | -1,15 | 2,28E-03 | 9,10  | 5,13E-04 | 17 | <i>POLDIP2</i>                                           | polymerase (DNA-directed), delta interacting protein 2                          |
| 7968254 | -1,06 | 8,30E-01 | -1,20 | 6,32E-02 | -1,26 | 1,29E-02 | 9,66  | 1,93E-02 | 13 | <i>POLR1D</i>                                            | polymerase (RNA) I polypeptide D, 16kDa                                         |
| 8055089 | -1,02 | 9,08E-01 | -1,11 | 8,93E-02 | -1,13 | 4,12E-02 | 7,38  | 4,91E-02 | 2  | <i>POLR2D</i>                                            | polymerase (RNA) II (DNA directed) polypeptide D                                |
| 7934653 | 1,14  | 1,44E-01 | -1,15 | 4,69E-02 | -1,01 | 9,59E-01 | 6,95  | 3,92E-02 | 10 | <i>POLR3A</i>                                            | polymerase (RNA) III (DNA directed) polypeptide A, 155kDa                       |
| 8024019 | 1,03  | 8,38E-01 | -1,14 | 1,22E-02 | -1,11 | 5,33E-02 | 10,26 | 1,24E-02 | 19 | <i>PTBP1</i>                                             | polypyrimidine tract binding protein 1                                          |
| 7903188 | 1,17  | 1,72E-01 | 1,07  | 4,91E-01 | 1,26  | 8,17E-03 | 7,76  | 1,34E-02 | 1  | <i>PTBP2</i>                                             | polypyrimidine tract binding protein 2                                          |
| 8071877 | -1,06 | 7,44E-01 | 1,21  | 9,29E-03 | 1,15  | 6,84E-02 | 6,75  | 9,16E-03 | 22 | <i>POM121L9P</i>                                         | POM121 membrane glycoprotein-like 9 (rat) pseudogene                            |
| 8167287 | 1,11  | 4,73E-01 | -1,20 | 2,38E-02 | -1,09 | 4,41E-01 | 7,46  | 3,72E-02 | X  | <i>PORCN</i>                                             | porcupine homolog (Drosophila)                                                  |
| 7937892 | -1,07 | 6,51E-01 | -1,09 | 2,36E-01 | -1,16 | 2,69E-02 | 8,48  | 4,75E-02 | 11 | <i>PGAP2</i>                                             | post-GPI attachment to proteins 2                                               |
| 8133754 | 1,12  | 7,17E-02 | -1,01 | 9,35E-01 | 1,11  | 5,11E-02 | 7,62  | 2,75E-02 | 7  | <i>PMS2L11</i>                                           | postmeiotic segregation increased 2-like 11 pseudogene                          |
| 7966202 | 1,20  | 5,77E-02 | -1,13 | 1,59E-01 | 1,06  | 6,15E-01 | 7,78  | 3,98E-02 | 12 | <i>KCTD10</i>                                            | potassium channel tetramerisation domain containing 10                          |
| 8023914 | -1,01 | 9,77E-01 | -1,14 | 5,72E-02 | -1,15 | 5,11E-02 | 7,99  | 4,47E-02 | 18 | <i>PQLC1</i>                                             | PQ loop repeat containing 1                                                     |
| 8172531 | -1,02 | 9,34E-01 | -1,16 | 7,47E-02 | -1,19 | 4,25E-02 | 8,03  | 4,58E-02 | X  | <i>PRAF2</i>                                             | PRA1 domain family, member 2                                                    |
| 7960984 | 1,20  | 3,66E-02 | -1,04 | 7,12E-01 | 1,16  | 6,68E-02 | 5,00  | 1,94E-02 | 12 | <i>PZP</i>                                               | pregnancy-zone protein                                                          |
| 7991465 | 1,06  | 9,04E-01 | 1,41  | 2,94E-02 | 1,50  | 9,00E-03 | 5,22  | 1,01E-02 | 15 | ---                                                      | PRO0800 gene:ENSG00000233726                                                    |
| 7927550 | 1,19  | 2,51E-01 | 1,16  | 1,80E-01 | 1,37  | 1,71E-03 | 8,20  | 4,54E-03 | 10 | <i>LOC100133130</i><br><i>LOC728407</i><br><i>BMS1P4</i> | PRO1102 /// poly(ADP-ribose) glycohydrolase pseudogene ///<br>BMS1 pseudogene 4 |
| 8141688 | 1,09  | 3,82E-01 | -1,17 | 1,17E-02 | -1,08 | 3,29E-01 | 7,68  | 1,50E-02 | 7  | <i>PLOD3</i>                                             | procollagen-lysine, 2-oxoglutarate 5-dioxygenase 3                              |
| 7904974 | 1,08  | 1,16E-01 | -1,07 | 5,27E-02 | 1,00  | 9,90E-01 | 12,07 | 3,71E-02 | 1  | <i>C1orf152</i>                                          | profilin 1 pseudogene                                                           |
| 7930226 | 1,09  | 3,24E-01 | -1,14 | 2,68E-02 | -1,04 | 6,27E-01 | 7,17  | 3,77E-02 | 10 | <i>PDCD11</i>                                            | programmed cell death 11                                                        |
| 8016552 | 1,11  | 2,37E-01 | -1,16 | 2,28E-02 | -1,04 | 6,85E-01 | 9,02  | 2,80E-02 | 17 | <i>PHB</i>                                               | prohibitin                                                                      |

|         |       |          |       |          |       |          |       |          |    |                  |                                                                   |
|---------|-------|----------|-------|----------|-------|----------|-------|----------|----|------------------|-------------------------------------------------------------------|
| 7960716 | 1,03  | 8,96E-01 | -1,16 | 2,17E-02 | -1,13 | 6,45E-02 | 9,15  | 2,35E-02 | 12 | <i>PHB2</i>      | prohibitin 2                                                      |
| 8117922 | 1,02  | 9,15E-01 | -1,13 | 3,48E-02 | -1,11 | 9,31E-02 | 7,14  | 4,12E-02 | 6  | <i>PRR3</i>      | proline rich 3                                                    |
| 8073705 | 1,15  | 8,56E-02 | -1,18 | 1,27E-02 | -1,03 | 7,74E-01 | 8,43  | 9,95E-03 | 22 | <i>PRR5</i>      | proline rich 5 (renal)                                            |
| 7939383 | 1,47  | 1,17E-02 | -1,38 | 2,68E-02 | 1,07  | 7,80E-01 | 8,68  | 5,12E-03 | 11 | <i>PRR5L</i>     | proline rich 5 like                                               |
| 8145854 | 1,03  | 8,59E-01 | -1,14 | 1,10E-02 | -1,11 | 3,79E-02 | 8,89  | 8,88E-03 | 8  | <i>PROSC</i>     | proline synthetase co-transcribed homolog (bacterial)             |
| 8121076 | -1,08 | 2,96E-01 | -1,03 | 5,74E-01 | -1,12 | 2,90E-02 | 10,65 | 4,24E-02 | 6  | <i>PNRC1</i>     | proline-rich nuclear receptor coactivator 1                       |
| 7961259 | 1,25  | 3,88E-02 | -1,12 | 2,53E-01 | 1,11  | 3,79E-01 | 6,72  | 3,12E-02 | 12 | <i>PRHI</i>      | proline-rich protein HaeIII subfamily 1                           |
| 8128572 | 1,21  | 8,66E-03 | -1,14 | 4,63E-02 | 1,06  | 5,44E-01 | 7,31  | 4,60E-03 | 6  | <i>PREP</i>      | prolyl endopeptidase                                              |
| 8043522 | -1,08 | 3,16E-01 | 1,13  | 1,47E-02 | 1,05  | 4,73E-01 | 5,72  | 1,99E-02 | 2  | <i>PROM2</i>     | prominin 2                                                        |
| 7969835 | 1,19  | 1,13E-02 | -1,05 | 4,78E-01 | 1,13  | 6,05E-02 | 6,23  | 7,01E-03 | 13 | <i>PCCA</i>      | propionyl Coenzyme A carboxylase, alpha polypeptide               |
| 8082886 | 1,07  | 4,92E-01 | -1,17 | 7,12E-03 | -1,09 | 1,66E-01 | 7,64  | 8,43E-03 | 3  | <i>PCCB</i>      | propionyl Coenzyme A carboxylase, beta polypeptide                |
| 7974363 | 1,64  | 5,74E-02 | -1,23 | 4,11E-01 | 1,34  | 2,80E-01 | 8,59  | 4,41E-02 | 14 | <i>PTGDR</i>     | prostaglandin D2 receptor (DP)                                    |
| 8159521 | 1,28  | 3,54E-02 | -1,14 | 2,35E-01 | 1,12  | 3,73E-01 | 6,63  | 2,66E-02 | 9  | <i>PTGDS</i>     | prostaglandin D2 synthase 21kDa (brain)                           |
| 8105067 | -1,11 | 3,03E-01 | -1,07 | 3,46E-01 | -1,19 | 9,28E-03 | 9,35  | 1,80E-02 | 5  | <i>PTGER4</i>    | prostaglandin E receptor 4 (subtype EP4)                          |
| 8028756 | 1,12  | 1,74E-01 | -1,17 | 1,27E-02 | -1,05 | 6,27E-01 | 9,24  | 1,39E-02 | 19 | <i>PSMC4</i>     | proteasome (prosome, macropain) 26S subunit, ATPase, 4            |
| 8006392 | 1,03  | 8,16E-01 | -1,17 | 3,76E-03 | -1,13 | 1,49E-02 | 8,60  | 2,52E-03 | 17 | <i>PSMD11</i>    | proteasome (prosome, macropain) 26S subunit, non-ATPase, 11       |
| 8006984 | 1,05  | 6,44E-01 | -1,15 | 6,66E-03 | -1,09 | 8,29E-02 | 8,47  | 6,75E-03 | 17 | <i>PSMD3</i>     | proteasome (prosome, macropain) 26S subunit, non-ATPase, 3        |
| 7973564 | 1,05  | 6,63E-01 | -1,13 | 2,22E-02 | -1,07 | 2,55E-01 | 10,12 | 3,53E-02 | 14 | <i>PSME1</i>     | proteasome (prosome, macropain) activator subunit 1 (PA 28 alpha) |
| 8053797 | 1,28  | 2,39E-01 | 1,12  | 4,85E-01 | 1,43  | 1,34E-02 | 6,74  | 2,25E-02 | 2  | <i>LOC400986</i> | protein immuno-reactive with anti-PTH polyclonal antibodies       |
| 7974835 | 1,22  | 2,89E-02 | -1,21 | 1,84E-02 | 1,01  | 9,79E-01 | 10,90 | 7,63E-03 | 14 | <i>PRKCH</i>     | protein kinase C, eta                                             |
| 7931930 | 1,18  | 9,82E-02 | -1,16 | 5,75E-02 | 1,01  | 9,58E-01 | 8,97  | 3,62E-02 | 10 | <i>PRKCQ</i>     | protein kinase C, theta                                           |
| 8061706 | 1,04  | 7,94E-01 | -1,12 | 3,05E-02 | -1,08 | 1,90E-01 | 6,37  | 4,71E-02 | 20 | <i>POFUT1</i>    | protein O-fucosyltransferase 1                                    |
| 7908841 | 1,11  | 6,15E-01 | 1,15  | 1,69E-01 | 1,28  | 1,26E-02 | 7,41  | 2,43E-02 | 1  | <i>PPP1R12B</i>  | protein phosphatase 1, regulatory (inhibitor) subunit 12B         |

|         |       |          |       |          |       |          |      |          |             |                 |                                                                                                     |
|---------|-------|----------|-------|----------|-------|----------|------|----------|-------------|-----------------|-----------------------------------------------------------------------------------------------------|
| 7981460 | 1,09  | 4,16E-01 | -1,17 | 1,59E-02 | -1,07 | 3,93E-01 | 7,16 | 2,37E-02 | 14          | <i>PPP1R13B</i> | protein phosphatase 1, regulatory (inhibitor) subunit 13B                                           |
| 8051119 | 1,01  | 9,75E-01 | -1,15 | 1,18E-02 | -1,14 | 1,23E-02 | 8,82 | 6,04E-03 | 2           | <i>PPM1G</i>    | protein phosphatase 1G (formerly 2C), magnesium-dependent, gamma isoform                            |
| 8030881 | 1,06  | 6,38E-01 | -1,16 | 1,66E-02 | -1,09 | 2,27E-01 | 9,53 | 2,65E-02 | 19          | <i>PPP2R1A</i>  | protein phosphatase 2 (formerly 2A), regulatory subunit A, alpha isoform                            |
| 8114900 | 1,35  | 2,25E-02 | -1,23 | 8,91E-02 | 1,10  | 5,88E-01 | 6,57 | 1,50E-02 | 5           | <i>PPP2R2B</i>  | protein phosphatase 2 (formerly 2A), regulatory subunit B, beta isoform                             |
| 8119627 | 1,04  | 7,61E-01 | -1,14 | 1,56E-02 | -1,10 | 1,17E-01 | 7,67 | 2,04E-02 | 6           | <i>PPP2R5D</i>  | protein phosphatase 2, regulatory subunit B', delta isoform                                         |
| 8158523 | 1,11  | 2,26E-01 | -1,20 | 4,16E-03 | -1,08 | 2,75E-01 | 8,02 | 4,16E-03 | 9           | <i>PPP2R4</i>   | protein phosphatase 2A activator, regulatory subunit 4                                              |
| 7990511 | 1,07  | 6,79E-01 | -1,20 | 9,29E-03 | -1,13 | 1,02E-01 | 8,09 | 1,07E-02 | 15          | <i>PTPN9</i>    | protein tyrosine phosphatase, non-receptor type 9                                                   |
| 8060539 | 1,07  | 1,46E-01 | -1,11 | 9,29E-03 | -1,03 | 5,68E-01 | 7,97 | 8,54E-03 | 20          | <i>PTPRA</i>    | protein tyrosine phosphatase, receptor type, A                                                      |
| 8180272 | -1,11 | 6,12E-01 | 1,24  | 2,94E-02 | 1,12  | 3,64E-01 | 3,91 | 4,96E-02 | 5           | <i>PCDHA6</i>   | protocadherin alpha 6                                                                               |
| 7926283 | 1,00  | 9,98E-01 | 1,26  | 3,53E-02 | 1,26  | 3,60E-02 | 8,41 | 2,62E-02 | 10          | <i>PRPF18</i>   | PRP18 pre-mRNA processing factor 18 homolog (S. cerevisiae)                                         |
| 8157283 | 1,09  | 3,78E-01 | -1,19 | 8,42E-03 | -1,09 | 2,60E-01 | 8,48 | 9,60E-03 | 9           | <i>PRPF4</i>    | PRP4 pre-mRNA processing factor 4 homolog (yeast)                                                   |
| 7934178 | 1,02  | 9,54E-01 | -1,15 | 4,47E-02 | -1,14 | 8,76E-02 | 6,50 | 4,90E-02 | 10          | <i>PCBD1</i>    | pterin-4 alpha-carbinolamine dehydratase/dimerization cofactor of hepatocyte nuclear factor 1 alpha |
| 8177026 | 1,05  | 8,21E-01 | -1,23 | 1,22E-02 | -1,17 | 5,94E-02 | 9,19 | 1,28E-02 | c("X", "Y") | <i>P2RY8</i>    | purinergic receptor P2Y, G-protein coupled, 8                                                       |
| 8069003 | 1,08  | 3,67E-01 | -1,15 | 1,18E-02 | -1,06 | 3,55E-01 | 7,11 | 1,57E-02 | 21          | <i>PWP2</i>     | PWP2 periodic tryptophan protein homolog (yeast)                                                    |
| 8008064 | 1,01  | 9,62E-01 | -1,15 | 2,93E-02 | -1,14 | 4,76E-02 | 7,94 | 2,63E-02 | 17          | <i>PNPO</i>     | pyridoxamine 5'-phosphate oxidase                                                                   |
| 7906386 | 1,44  | 8,77E-03 | -1,15 | 3,16E-01 | 1,25  | 1,02E-01 | 8,79 | 6,07E-03 | 1           | <i>PYHIN1</i>   | pyrin and HIN domain family, member 1                                                               |
| 7939329 | -1,00 | 9,96E-01 | -1,14 | 5,21E-02 | -1,14 | 5,86E-02 | 8,91 | 4,53E-02 | 11          | <i>PDHX</i>     | pyruvate dehydrogenase complex, component X                                                         |
| 8008263 | -1,01 | 9,78E-01 | -1,23 | 1,31E-02 | -1,24 | 7,45E-03 | 7,81 | 5,13E-03 | 17          | <i>PDK2</i>     | pyruvate dehydrogenase kinase, isozyme 2                                                            |
| 7978239 | 1,08  | 3,97E-01 | -1,17 | 7,12E-03 | -1,08 | 2,22E-01 | 7,56 | 8,26E-03 | 14          | <i>RABGGTA</i>  | Rab geranylgeranyltransferase, alpha subunit                                                        |
| 7967456 | -1,28 | 2,66E-02 | 1,19  | 9,07E-02 | -1,08 | 6,14E-01 | 9,26 | 1,73E-02 | 12          | <i>RILPL2</i>   | Rab interacting lysosomal protein-like 2                                                            |
| 8074880 | 1,03  | 8,70E-01 | 1,10  | 9,16E-02 | 1,13  | 2,87E-02 | 5,26 | 3,82E-02 | 22          | <i>RAB36</i>    | RAB36, member RAS oncogene family                                                                   |
| 8028930 | 1,06  | 6,77E-01 | -1,14 | 2,19E-02 | -1,08 | 2,40E-01 | 8,42 | 3,47E-02 | 19          | <i>RAB4B</i>    | RAB4B, member RAS oncogene family                                                                   |

|         |       |          |       |          |       |          |      |          |    |                    |                                                                     |
|---------|-------|----------|-------|----------|-------|----------|------|----------|----|--------------------|---------------------------------------------------------------------|
| 7923812 | 1,20  | 3,17E-02 | -1,13 | 1,12E-01 | 1,06  | 5,88E-01 | 8,60 | 2,10E-02 | 1  | <i>RAB7L1</i>      | RAB7, member RAS oncogene family-like 1                             |
| 8085665 | 1,19  | 3,81E-02 | -1,12 | 1,21E-01 | 1,06  | 6,04E-01 | 8,15 | 2,56E-02 | 3  | <i>RFTN1</i>       | raftlin, lipid raft linker 1                                        |
| 8164810 | 1,15  | 2,08E-01 | -1,23 | 1,28E-02 | -1,07 | 5,74E-01 | 7,73 | 1,50E-02 | 9  | <i>RALGDS</i>      | ral guanine nucleotide dissociation stimulator                      |
| 8164692 | 1,20  | 2,23E-01 | 1,18  | 1,50E-01 | 1,42  | 1,01E-03 | 5,35 | 2,93E-03 | 9  | <i>RAPGEF1</i>     | Rap guanine nucleotide exchange factor (GEF) 1                      |
| 7962623 | 1,00  | 9,95E-01 | 1,13  | 5,49E-02 | 1,13  | 6,02E-02 | 5,94 | 4,87E-02 | 12 | <i>RAPGEF3</i>     | Rap guanine nucleotide exchange factor (GEF) 3                      |
| 7989365 | 1,26  | 1,46E-02 | -1,03 | 7,83E-01 | 1,22  | 2,10E-02 | 8,97 | 5,74E-03 | 15 | <i>RORA</i>        | RAR-related orphan receptor A                                       |
| 8087640 | 1,21  | 4,45E-02 | -1,07 | 4,91E-01 | 1,13  | 1,87E-01 | 7,85 | 3,35E-02 | 3  | <i>RASSF1</i>      | Ras association (RalGDS/AF-6) domain family member 1                |
| 7963009 | 1,15  | 3,88E-02 | -1,08 | 2,45E-01 | 1,07  | 3,91E-01 | 4,36 | 3,10E-02 | 12 | <i>RHEBL1</i>      | Ras homolog enriched in brain like 1                                |
| 7918593 | 1,28  | 6,70E-02 | -1,22 | 8,91E-02 | 1,05  | 8,14E-01 | 8,67 | 3,51E-02 | 1  | <i>RHOC</i>        | ras homolog gene family, member C                                   |
| 7967202 | 1,14  | 1,77E-01 | -1,19 | 1,47E-02 | -1,05 | 6,59E-01 | 9,32 | 1,61E-02 | 12 | <i>RHOF</i>        | ras homolog gene family, member F (in filopodia)                    |
| 8035050 | 1,20  | 5,07E-02 | -1,13 | 1,64E-01 | 1,07  | 5,80E-01 | 8,59 | 3,62E-02 | 19 | <i>RASAL3</i>      | RAS protein activator like 3                                        |
| 8116740 | -1,09 | 1,06E-01 | -1,02 | 7,26E-01 | -1,12 | 1,37E-02 | 7,79 | 1,64E-02 | 6  | <i>RREB1</i>       | ras responsive element binding protein 1                            |
| 8154523 | -1,04 | 7,70E-01 | -1,09 | 8,71E-02 | -1,12 | 1,24E-02 | 7,59 | 2,05E-02 | 9  | <i>RRAGA</i>       | Ras-related GTP binding A                                           |
| 7930205 | 1,14  | 2,70E-01 | 1,07  | 4,83E-01 | 1,22  | 1,63E-02 | 4,79 | 2,68E-02 | 10 | <i>hCG_2024410</i> | rcRPE                                                               |
| 7905938 | 1,05  | 7,83E-01 | -1,23 | 4,22E-03 | -1,17 | 2,33E-02 | 8,89 | 3,31E-03 | 1  | <i>RAGIAP1</i>     | recombination activating gene 1 activating protein 1                |
| 7905185 | -1,03 | 8,82E-01 | -1,17 | 1,66E-02 | -1,20 | 2,95E-03 | 9,16 | 3,89E-03 | 1  | <i>RPRD2</i>       | regulation of nuclear pre-mRNA domain containing 2                  |
| 8009277 | 1,47  | 1,83E-02 | -1,32 | 6,15E-02 | 1,11  | 6,42E-01 | 6,14 | 1,08E-02 | 17 | <i>RGS9</i>        | regulator of G-protein signaling 9                                  |
| 7919971 | 1,03  | 8,90E-01 | -1,16 | 1,60E-02 | -1,13 | 4,97E-02 | 8,08 | 1,64E-02 | 1  | <i>RFX5</i>        | regulatory factor X, 5 (influences HLA class II expression)         |
| 8110437 | 1,06  | 6,87E-01 | -1,17 | 1,17E-02 | -1,11 | 1,24E-01 | 7,57 | 1,45E-02 | 5  | <i>RMND5B</i>      | required for meiotic nuclear division 5 homolog B (S. cerevisiae)   |
| 7937275 | 1,09  | 1,96E-01 | -1,16 | 5,12E-03 | -1,06 | 3,44E-01 | 8,34 | 4,84E-03 | 11 | <i>RIC8A</i>       | resistance to inhibitors of cholinesterase 8 homolog A (C. elegans) |
| 7940781 | -1,06 | 8,04E-01 | 1,23  | 2,44E-02 | 1,16  | 1,48E-01 | 8,18 | 3,52E-02 | 11 | <i>RTN3</i>        | reticulon 3                                                         |
| 7940775 | 1,25  | 2,36E-02 | -1,16 | 1,13E-01 | 1,08  | 5,26E-01 | 8,15 | 1,68E-02 | 11 | <i>RARRES3</i>     | retinoic acid receptor responder (tazarotene induced) 3             |
| 7906163 | -1,06 | 6,52E-01 | 1,13  | 2,52E-02 | 1,07  | 2,90E-01 | 5,46 | 4,17E-02 | 1  | <i>RHBG</i>        | Rh family, B glycoprotein (gene/pseudogene)                         |

|         |       |          |       |          |       |          |       |          |    |                 |                                                  |
|---------|-------|----------|-------|----------|-------|----------|-------|----------|----|-----------------|--------------------------------------------------|
| 8133662 | -1,02 | 9,13E-01 | -1,14 | 6,60E-02 | -1,17 | 2,95E-02 | 9,42  | 3,46E-02 | 7  | <i>RHBDD2</i>   | rhomboid domain containing 2                     |
| 7977507 | 1,01  | 9,83E-01 | 1,17  | 5,14E-02 | 1,18  | 4,64E-02 | 10,51 | 3,94E-02 | 14 | <i>RPPHI</i>    | ribonuclease P RNA component H1                  |
| 8130768 | -1,16 | 2,90E-01 | 1,23  | 3,05E-02 | 1,06  | 6,96E-01 | 8,27  | 4,06E-02 | 6  | <i>RNASET2</i>  | ribonuclease T2                                  |
| 8130783 | -1,04 | 8,39E-01 | 1,25  | 5,83E-03 | 1,19  | 2,10E-02 | 7,13  | 4,16E-03 | 6  | <i>RNASET2</i>  | ribonuclease T2                                  |
| 8062349 | 1,04  | 7,64E-01 | -1,13 | 2,71E-02 | -1,08 | 1,97E-01 | 9,69  | 4,21E-02 | 20 | <i>RPN2</i>     | ribophorin II                                    |
| 8024299 | 1,04  | 7,64E-01 | -1,12 | 2,78E-02 | -1,08 | 2,00E-01 | 10,53 | 4,36E-02 | 19 | <i>RPS15</i>    | ribosomal protein S15                            |
| 7950626 | 1,02  | 9,61E-01 | 1,24  | 4,39E-02 | 1,27  | 2,95E-02 | 8,19  | 2,68E-02 | 11 | <i>RPS20P27</i> | ribosomal protein S20 pseudogene 27              |
| 7922504 | 1,03  | 9,19E-01 | 1,22  | 4,93E-02 | 1,26  | 2,13E-02 | 8,89  | 2,36E-02 | 1  | <i>RFWD2</i>    | ring finger and WD repeat domain 2               |
| 8178244 | 1,09  | 2,43E-01 | -1,12 | 3,45E-02 | -1,03 | 7,81E-01 | 7,67  | 4,14E-02 | 6  | <i>RING1</i>    | ring finger protein 1                            |
| 8021120 | 1,31  | 3,85E-02 | -1,15 | 2,49E-01 | 1,14  | 3,79E-01 | 6,10  | 3,02E-02 | 18 | <i>RNF165</i>   | ring finger protein 165                          |
| 7913206 | -1,03 | 8,78E-01 | 1,13  | 3,45E-02 | 1,10  | 1,28E-01 | 6,38  | 4,63E-02 | 1  | <i>RNF186</i>   | ring finger protein 186                          |
| 7944510 | -1,05 | 8,38E-01 | -1,20 | 2,67E-02 | -1,25 | 3,89E-03 | 8,12  | 5,45E-03 | 11 | <i>RNF26</i>    | ring finger protein 26                           |
| 8179472 | 1,11  | 3,73E-01 | -1,24 | 5,76E-03 | -1,11 | 1,92E-01 | 7,27  | 5,84E-03 | 6  | <i>RNF5</i>     | ring finger protein 5                            |
| 7941694 | 1,15  | 5,74E-02 | -1,16 | 1,60E-02 | -1,02 | 9,08E-01 | 8,48  | 1,07E-02 | 11 | <i>RBM14</i>    | RNA binding motif protein 14                     |
| 8080093 | -1,04 | 8,31E-01 | -1,11 | 1,16E-01 | -1,15 | 2,96E-02 | 7,05  | 4,41E-02 | 3  | <i>RBM15B</i>   | RNA binding motif protein 15B                    |
| 8027908 | 1,09  | 1,79E-01 | -1,09 | 5,22E-02 | -1,01 | 9,49E-01 | 7,46  | 4,90E-02 | 19 | <i>RBM42</i>    | RNA binding motif protein 42                     |
| 8085233 | 1,11  | 2,38E-01 | -1,16 | 1,66E-02 | -1,05 | 6,10E-01 | 7,99  | 2,17E-02 | 3  | <i>RPUSD3</i>   | RNA pseudouridylate synthase domain containing 3 |
| 8060895 | 1,13  | 4,01E-01 | 1,12  | 2,33E-01 | 1,26  | 7,37E-03 | 5,90  | 1,54E-02 | 20 | <i>RNU105B</i>  | RNA, U105B small nucleolar                       |
| 7967028 | 1,56  | 3,07E-01 | 1,57  | 1,24E-01 | 2,45  | 1,30E-03 | 7,07  | 3,70E-03 | 12 | <i>RNU4-2</i>   | RNA, U4 small nuclear 2                          |
| 7913805 | 1,19  | 1,77E-01 | -1,22 | 4,25E-02 | -1,02 | 9,08E-01 | 9,41  | 4,06E-02 | 1  | <i>RUNX3</i>    | runt-related transcription factor 3              |
| 8014257 | 1,36  | 3,22E-03 | -1,19 | 7,31E-02 | 1,14  | 2,32E-01 | 8,76  | 1,89E-03 | 17 | <i>SLFN12L</i>  | schlafen family member 12-like                   |
| 8014248 | 1,26  | 3,32E-02 | -1,10 | 3,42E-01 | 1,14  | 2,43E-01 | 7,78  | 2,53E-02 | 17 | <i>SLFN13</i>   | schlafen family member 13                        |
| 7931951 | 1,21  | 2,13E-02 | -1,06 | 5,02E-01 | 1,14  | 9,56E-02 | 8,06  | 1,42E-02 | 10 | <i>SFMBT2</i>   | Scm-like with four mbt domains 2                 |

|         |       |          |       |          |       |          |       |          |    |                  |                                                                                                                  |
|---------|-------|----------|-------|----------|-------|----------|-------|----------|----|------------------|------------------------------------------------------------------------------------------------------------------|
| 8108099 | -1,01 | 9,58E-01 | -1,11 | 5,07E-02 | -1,12 | 3,49E-02 | 8,43  | 3,34E-02 | 5  | <i>SEC24A</i>    | SEC24 family, member A ( <i>S. cerevisiae</i> )                                                                  |
| 8101376 | 1,05  | 6,24E-01 | -1,15 | 1,08E-02 | -1,09 | 1,43E-01 | 10,25 | 1,28E-02 | 4  | <i>SEC31A</i>    | SEC31 homolog A ( <i>S. cerevisiae</i> )                                                                         |
| 8082408 | 1,04  | 7,02E-01 | -1,12 | 2,21E-02 | -1,07 | 2,19E-01 | 9,67  | 3,47E-02 | 3  | <i>SEC61A1</i>   | Sec61 alpha 1 subunit ( <i>S. cerevisiae</i> )                                                                   |
| 7990417 | 1,04  | 7,75E-01 | -1,14 | 2,78E-02 | -1,09 | 1,91E-01 | 10,08 | 4,29E-02 | 15 | <i>SCAMP2</i>    | secretory carrier membrane protein 2                                                                             |
| 8054004 | 1,26  | 1,14E-02 | -1,23 | 1,65E-02 | 1,03  | 8,78E-01 | 6,85  | 3,89E-03 | 2  | <i>SEMA4C</i>    | sema domain, immunoglobulin domain (Ig), transmembrane domain (TM) and short cytoplasmic domain, (semaphorin) 4C |
| 7956401 | -1,01 | 9,68E-01 | -1,16 | 3,57E-02 | -1,17 | 2,49E-02 | 8,80  | 2,14E-02 | 12 | <i>SHMT2</i>     | serine hydroxy methyltransferase 2 (mitochondrial)                                                               |
| 8062908 | 1,01  | 9,48E-01 | 1,10  | 2,80E-02 | 1,11  | 1,33E-02 | 10,75 | 1,28E-02 | 20 | <i>STK4</i>      | serine/threonine kinase 4                                                                                        |
| 8123609 | 1,08  | 7,09E-01 | -1,28 | 7,12E-03 | -1,19 | 6,27E-02 | 9,87  | 7,10E-03 | 6  | <i>SERPINB9</i>  | serpin peptidase inhibitor, clade B (ovalbumin), member 9                                                        |
| 8003667 | 1,21  | 6,78E-02 | -1,15 | 1,24E-01 | 1,05  | 7,19E-01 | 6,24  | 4,10E-02 | 17 | <i>SERPINF1</i>  | serpin peptidase inhibitor, clade F (alpha-2 antip lasmin, pigment epithelium derived factor), member 1          |
| 8052669 | -1,14 | 2,28E-01 | -1,03 | 7,58E-01 | -1,17 | 4,27E-02 | 8,48  | 4,91E-02 | 2  | <i>SERTAD2</i>   | SERTA domain containing 2                                                                                        |
| 8001306 | 1,00  | 9,96E-01 | 1,18  | 1,69E-02 | 1,18  | 1,45E-02 | 6,91  | 9,60E-03 | 16 | <i>SIAHI</i>     | seven in absentia homolog 1 ( <i>Drosophila</i> )                                                                |
| 7915363 | 1,07  | 6,33E-01 | -1,18 | 1,24E-02 | -1,10 | 1,67E-01 | 7,46  | 1,71E-02 | 1  | <i>SCMHI</i>     | sex comb on midleg homolog 1 ( <i>Drosophila</i> )                                                               |
| 8142036 | 1,01  | 9,78E-01 | 1,14  | 3,45E-02 | 1,15  | 2,69E-02 | 9,21  | 2,18E-02 | 7  | <i>SRPK2</i>     | SFRS protein kinase 2                                                                                            |
| 7921900 | 1,79  | 3,88E-02 | -1,20 | 5,22E-01 | 1,49  | 1,49E-01 | 9,24  | 2,68E-02 | 1  | <i>SH2D1B</i>    | SH2 domain containing 1B                                                                                         |
| 7921144 | 1,54  | 2,35E-03 | -1,30 | 3,71E-02 | 1,18  | 2,46E-01 | 8,02  | 6,92E-04 | 1  | <i>SH2D2A</i>    | SH2 domain protein 2A                                                                                            |
| 7994603 | 1,20  | 1,33E-01 | -1,20 | 4,97E-02 | -1,00 | 9,85E-01 | 9,15  | 3,94E-02 | 16 | <i>SPN</i>       | sialophorin                                                                                                      |
| 8081710 | 1,24  | 3,02E-02 | -1,24 | 1,81E-02 | 1,00  | 9,87E-01 | 8,12  | 7,84E-03 | 3  | <i>SIDT1</i>     | SID1 transmembrane family, member 1                                                                              |
| 7944049 | 1,01  | 9,88E-01 | -1,27 | 4,77E-02 | -1,26 | 6,27E-02 | 9,15  | 4,41E-02 | 11 | <i>SIDT2</i>     | SID1 transmembrane family, member 2                                                                              |
| 7929919 | 1,08  | 4,45E-01 | -1,17 | 9,29E-03 | -1,08 | 2,35E-01 | 7,68  | 1,17E-02 | 10 | <i>SFXN3</i>     | sideroflexin 3                                                                                                   |
| 7967091 | -1,02 | 9,15E-01 | -1,10 | 4,26E-02 | -1,11 | 1,64E-02 | 9,28  | 1,85E-02 | 12 | <i>UNQ1887</i>   | signal peptide peptidase 3                                                                                       |
| 7952557 | 1,06  | 5,67E-01 | -1,15 | 9,29E-03 | -1,08 | 1,61E-01 | 10,35 | 1,15E-02 | 11 | <i>SRPR</i>      | signal recognition particle receptor (docking protein)                                                           |
| 8057771 | 1,36  | 4,30E-03 | -1,11 | 3,23E-01 | 1,22  | 5,33E-02 | 9,47  | 2,98E-03 | 2  | <i>STAT4</i>     | signal transducer and activator of transcription 4                                                               |
| 8059672 | 1,10  | 4,69E-01 | -1,19 | 2,22E-02 | -1,08 | 4,30E-01 | 9,32  | 3,51E-02 | 2  | <i>LOC645870</i> | similar to barrier-to-autointegration factor                                                                     |

|         |       |          |       |          |       |          |       |          |    |                     |                                                                    |
|---------|-------|----------|-------|----------|-------|----------|-------|----------|----|---------------------|--------------------------------------------------------------------|
| 7986428 | 1,17  | 1,29E-01 | 1,03  | 7,51E-01 | 1,21  | 1,91E-02 | 7,39  | 2,18E-02 | 15 | <i>LOC400464</i>    | similar to FLJ43276 protein                                        |
| 8081808 | 1,15  | 5,46E-01 | 1,31  | 2,78E-02 | 1,51  | 4,30E-04 | 4,19  | 1,25E-03 | 3  | <i>LOC100128175</i> | similar to PRO2591                                                 |
| 7957606 | 1,08  | 5,89E-01 | 1,09  | 2,03E-01 | 1,18  | 1,45E-02 | 5,07  | 2,83E-02 | 12 | <i>LOC283398</i>    | similar to suchb                                                   |
| 7912861 | 1,08  | 6,23E-01 | 1,10  | 2,55E-01 | 1,19  | 2,68E-02 | 6,31  | 4,76E-02 | 1  | <i>LOC644634</i>    | similar to UPF0627 protein ENSP00000358171                         |
| 7990487 | -1,05 | 6,52E-01 | -1,09 | 1,06E-01 | -1,15 | 7,46E-03 | 9,24  | 1,46E-02 | 15 | <i>SIN3A</i>        | SIN3 homolog A, transcription regulator (yeast)                    |
| 7945377 | 1,17  | 1,00E-01 | -1,15 | 8,00E-02 | 1,02  | 9,07E-01 | 8,58  | 4,41E-02 | 11 | <i>SIGIRR</i>       | single immunoglobulin and toll-interleukin 1 receptor (TIR) domain |
| 7906613 | 1,43  | 3,62E-02 | -1,32 | 6,67E-02 | 1,08  | 7,55E-01 | 8,40  | 1,92E-02 | 1  | <i>SLAMF7</i>       | SLAM family member 7                                               |
| 8023191 | 1,01  | 9,82E-01 | 1,27  | 4,73E-02 | 1,28  | 4,09E-02 | 8,20  | 3,43E-02 | 18 | <i>SMAD2</i>        | SMAD family member 2                                               |
| 8023220 | 1,21  | 1,63E-01 | -1,25 | 3,66E-02 | -1,03 | 8,99E-01 | 6,65  | 3,50E-02 | 18 | <i>SMAD7</i>        | SMAD family member 7                                               |
| 8021181 | 1,25  | 3,78E-02 | -1,13 | 2,28E-01 | 1,11  | 4,06E-01 | 10,47 | 2,91E-02 | 18 | <i>SCARNA17</i>     | small Cajal body-specific RNA 17                                   |
| 8021183 | 1,29  | 3,78E-02 | -1,20 | 9,27E-02 | 1,07  | 6,83E-01 | 10,01 | 2,32E-02 | 18 | <i>SCARNA17</i>     | small Cajal body-specific RNA 17                                   |
| 8053909 | 1,10  | 1,88E-01 | -1,17 | 4,73E-03 | -1,06 | 3,37E-01 | 9,99  | 4,54E-03 | 2  | <i>SNRNP200</i>     | small nuclear ribonucleoprotein 200kDa (U5)                        |
| 8028916 | 1,01  | 9,58E-01 | -1,15 | 2,21E-02 | -1,14 | 3,60E-02 | 9,16  | 1,86E-02 | 19 | <i>SNRPA</i>        | small nuclear ribonucleoprotein polypeptide A                      |
| 8154394 | 1,19  | 1,29E-01 | 1,00  | 9,97E-01 | 1,19  | 6,20E-02 | 9,13  | 4,44E-02 | 9  | <i>SNAPC3</i>       | small nuclear RNA activating complex, polypeptide 3, 50kDa         |
| 7948900 | -1,06 | 8,75E-01 | -1,23 | 1,02E-01 | -1,31 | 3,42E-02 | 7,82  | 4,63E-02 | 11 | <i>SNORD30</i>      | small nucleolar RNA, C/D box 30                                    |
| 7975453 | 1,29  | 6,18E-01 | 1,67  | 3,61E-02 | 2,15  | 1,13E-03 | 4,92  | 2,76E-03 | 14 | <i>SNORD56B</i>     | small nucleolar RNA, C/D box 56B                                   |
| 7951030 | 1,09  | 8,40E-01 | 1,36  | 4,94E-02 | 1,49  | 9,78E-03 | 8,20  | 1,42E-02 | 11 | <i>SNORD6</i>       | small nucleolar RNA, C/D box 6                                     |
| 7951032 | -1,05 | 9,43E-01 | 1,74  | 9,29E-03 | 1,65  | 1,32E-02 | 7,17  | 4,91E-03 | 11 | <i>SNORA1</i>       | small nucleolar RNA, H/ACA box 1                                   |
| 7962827 | 1,13  | 7,15E-01 | 1,50  | 6,46E-03 | 1,69  | 1,03E-04 | 5,31  | 2,44E-04 | 12 | <i>SNORA2A</i>      | small nucleolar RNA, H/ACA box 2A                                  |
| 7920873 | 1,12  | 7,82E-01 | 1,38  | 4,74E-02 | 1,55  | 5,57E-03 | 8,57  | 9,04E-03 | 1  | <i>SNORA42</i>      | small nucleolar RNA, H/ACA box 42                                  |
| 7915227 | 1,06  | 7,61E-01 | 1,18  | 2,91E-02 | 1,24  | 2,11E-03 | 6,72  | 4,14E-03 | 1  | <i>SNORA55</i>      | small nucleolar RNA, H/ACA box 55                                  |
| 8005626 | 1,09  | 5,93E-01 | 1,11  | 2,28E-01 | 1,22  | 1,83E-02 | 6,31  | 3,47E-02 | 1  | <i>SNORA59A</i>     | small nucleolar RNA, H/ACA box 59A                                 |
| 8052524 | 1,24  | 2,59E-01 | 1,20  | 1,89E-01 | 1,50  | 1,88E-03 | 5,38  | 4,91E-03 | 2  | <i>SNORA70B</i>     | small nucleolar RNA, H/ACA box 70B (retrotransposed)               |



|         |       |          |       |          |       |          |       |          |    |                 |                                                                                            |
|---------|-------|----------|-------|----------|-------|----------|-------|----------|----|-----------------|--------------------------------------------------------------------------------------------|
| 7964830 | 1,12  | 7,43E-01 | 1,25  | 1,21E-01 | 1,41  | 1,64E-02 | 6,70  | 2,84E-02 | 12 | <i>SNORA70G</i> | small nucleolar RNA, H/ACA box 70G (retrotransposed)                                       |
| 8108420 | 1,11  | 5,55E-01 | 1,18  | 8,80E-02 | 1,31  | 2,95E-03 | 5,63  | 6,93E-03 | 5  | <i>SNORA74A</i> | small nucleolar RNA, H/ACA box 74A                                                         |
| 7920217 | 1,06  | 7,19E-01 | 1,13  | 1,01E-01 | 1,20  | 1,08E-02 | 8,05  | 1,97E-02 | 1  | <i>SPRR2G</i>   | small proline-rich protein 2G                                                              |
| 7994006 | 1,13  | 3,68E-01 | 1,10  | 3,03E-01 | 1,23  | 1,02E-02 | 11,43 | 2,02E-02 | 16 | <i>SMG1</i>     | SMG1 homolog, phosphatidylinositol 3-kinase-related kinase (C. elegans)                    |
| 8000834 | 1,07  | 5,85E-01 | 1,08  | 2,70E-01 | 1,15  | 2,42E-02 | 11,23 | 4,41E-02 | 16 | <i>SMG1</i>     | SMG1 homolog, phosphatidylinositol 3-kinase-related kinase (C. elegans)                    |
| 8000638 | 1,14  | 4,02E-01 | 1,10  | 3,79E-01 | 1,26  | 1,91E-02 | 11,20 | 3,47E-02 | 16 | <i>SMG1</i>     | SMG1 homolog, phosphatidylinositol 3-kinase-related kinase (C. elegans)                    |
| 8002333 | 1,13  | 2,85E-01 | 1,10  | 2,30E-01 | 1,24  | 3,42E-03 | 11,18 | 7,96E-03 | 16 | <i>SMG1</i>     | SMG1 homolog, phosphatidylinositol 3-kinase-related kinase (C. elegans)                    |
| 8000823 | 1,14  | 3,25E-01 | 1,07  | 5,11E-01 | 1,21  | 2,58E-02 | 10,78 | 3,98E-02 | 16 | <i>SMG1</i>     | SMG1 homolog, phosphatidylinositol 3-kinase-related kinase (C. elegans)                    |
| 8000651 | 1,13  | 3,87E-01 | 1,11  | 2,35E-01 | 1,26  | 6,97E-03 | 7,87  | 1,46E-02 | 16 | <i>SMG1</i>     | SMG1 homolog, phosphatidylinositol 3-kinase-related kinase (C. elegans)                    |
| 8044499 | 1,20  | 3,88E-02 | -1,08 | 3,84E-01 | 1,12  | 2,42E-01 | 9,21  | 3,11E-02 | 2  | <i>SLC20A1</i>  | solute carrier family 20 (phosphate transporter), member 1                                 |
| 8123232 | -1,07 | 7,65E-01 | 1,23  | 2,69E-02 | 1,15  | 1,96E-01 | 6,04  | 4,17E-02 | 6  | <i>SLC22A1</i>  | solute carrier family 22 (organic cation transporter), member 1                            |
| 8056766 | 1,15  | 1,28E-01 | -1,15 | 6,88E-02 | 1,01  | 9,64E-01 | 7,79  | 4,74E-02 | 2  | <i>SLC25A12</i> | solute carrier family 25 (mitochondrial carrier, Aralar), member 12                        |
| 8033190 | 1,03  | 8,39E-01 | -1,12 | 3,04E-02 | -1,09 | 1,45E-01 | 6,14  | 4,33E-02 | 19 | <i>SLC25A23</i> | solute carrier family 25 (mitochondrial carrier; phosphate carrier), member 23             |
| 8018352 | 1,06  | 5,79E-01 | -1,14 | 1,35E-02 | -1,08 | 2,23E-01 | 6,58  | 1,98E-02 | 17 | <i>SLC25A19</i> | solute carrier family 25 (mitochondrial thiamine pyrophosphate carrier), member 19         |
| 8012450 | 1,07  | 5,38E-01 | -1,16 | 1,18E-02 | -1,08 | 2,21E-01 | 6,01  | 1,64E-02 | 17 | <i>SLC25A35</i> | solute carrier family 25, member 35                                                        |
| 7940717 | 1,09  | 5,79E-01 | -1,18 | 2,55E-02 | -1,09 | 3,62E-01 | 8,24  | 4,26E-02 | 11 | <i>SLC3A2</i>   | solute carrier family 3 (activators of dibasic and neutral amino acid transport), member 2 |
| 8108558 | 1,07  | 5,86E-01 | -1,17 | 1,50E-02 | -1,09 | 2,34E-01 | 9,25  | 2,22E-02 | 5  | <i>SLC35A4</i>  | solute carrier family 35, member A4                                                        |
| 7939590 | 1,03  | 8,81E-01 | -1,20 | 3,78E-03 | -1,17 | 8,83E-03 | 7,36  | 2,00E-03 | 11 | <i>SLC35C1</i>  | solute carrier family 35, member C1                                                        |
| 8066697 | 1,04  | 7,75E-01 | -1,12 | 2,26E-02 | -1,08 | 1,59E-01 | 8,25  | 3,35E-02 | 20 | <i>SLC35C2</i>  | solute carrier family 35, member C2                                                        |
| 8068810 | 1,06  | 6,18E-01 | -1,18 | 8,65E-03 | -1,11 | 1,17E-01 | 7,50  | 9,55E-03 | 21 | <i>SLC37A1</i>  | solute carrier family 37 (glycerol-3-phosphate transporter), member 1                      |
| 8145122 | 1,11  | 1,02E-01 | -1,13 | 2,52E-02 | -1,01 | 9,08E-01 | 6,19  | 2,05E-02 | 8  | <i>SLC39A14</i> | solute carrier family 39 (zinc transporter), member 14                                     |

|         |       |          |       |          |       |          |      |          |    |                |                                                                                  |
|---------|-------|----------|-------|----------|-------|----------|------|----------|----|----------------|----------------------------------------------------------------------------------|
| 8095585 | 1,44  | 1,23E-02 | -1,22 | 1,49E-01 | 1,18  | 3,18E-01 | 6,52 | 9,60E-03 | 4  | <i>SLC4A4</i>  | solute carrier family 4, sodium bicarbonate cotransporter, member 4              |
| 7923824 | 1,08  | 5,11E-01 | -1,18 | 9,29E-03 | -1,10 | 1,91E-01 | 7,40 | 1,15E-02 | 1  | <i>SLC41A1</i> | solute carrier family 41, member 1                                               |
| 7948249 | 1,06  | 7,44E-01 | -1,21 | 1,03E-02 | -1,15 | 7,72E-02 | 8,03 | 1,08E-02 | 11 | <i>SLC43A1</i> | solute carrier family 43, member 1                                               |
| 7948229 | -1,03 | 8,68E-01 | -1,14 | 4,97E-02 | -1,18 | 1,26E-02 | 8,84 | 1,70E-02 | 11 | <i>SLC43A3</i> | solute carrier family 43, member 3                                               |
| 7955055 | -1,01 | 9,92E-01 | -1,27 | 5,27E-02 | -1,28 | 5,38E-02 | 8,52 | 4,38E-02 | 12 | <i>SLC48A1</i> | solute carrier family 48 (heme transporter), member 1                            |
| 8172280 | -1,06 | 8,19E-01 | -1,17 | 8,67E-02 | -1,23 | 1,78E-02 | 7,17 | 2,68E-02 | X  | <i>SLC9A7</i>  | solute carrier family 9 (sodium/hydrogen exchanger), member 7                    |
| 8040908 | 1,14  | 1,70E-01 | -1,15 | 5,06E-02 | -1,01 | 9,53E-01 | 9,75 | 4,61E-02 | 2  | <i>SNX17</i>   | sorting nexin 17                                                                 |
| 8105328 | -1,04 | 8,56E-01 | 1,20  | 1,66E-02 | 1,15  | 7,33E-02 | 8,05 | 2,02E-02 | 5  | <i>SNX18</i>   | sorting nexin 18                                                                 |
| 8107613 | -1,02 | 9,08E-01 | -1,14 | 5,50E-02 | -1,17 | 2,35E-02 | 9,95 | 2,68E-02 | 5  | <i>SNX2</i>    | sorting nexin 2                                                                  |
| 7993281 | -1,08 | 5,55E-01 | -1,10 | 2,04E-01 | -1,18 | 1,26E-02 | 8,23 | 2,48E-02 | 16 | <i>SNX29</i>   | sorting nexin 29                                                                 |
| 8131709 | 1,08  | 4,21E-01 | -1,14 | 2,83E-02 | -1,05 | 5,34E-01 | 9,35 | 4,42E-02 | 7  | <i>SP4</i>     | Sp4 transcription factor                                                         |
| 8130211 | 1,39  | 1,13E-02 | -1,03 | 8,52E-01 | 1,35  | 1,16E-02 | 8,13 | 3,82E-03 | 6  | <i>SYNE1</i>   | spectrin repeat containing, nuclear envelope 1                                   |
| 7974920 | 1,29  | 3,11E-03 | 1,04  | 7,10E-01 | 1,33  | 9,90E-05 | 8,86 | 1,29E-04 | 14 | <i>SYNE2</i>   | spectrin repeat containing, nuclear envelope 2                                   |
| 8104856 | 1,12  | 2,07E-01 | 1,04  | 6,15E-01 | 1,16  | 1,96E-02 | 4,46 | 2,73E-02 | 5  | <i>SPEF2</i>   | sperm flagellar 2                                                                |
| 7912374 | 1,03  | 8,96E-01 | -1,17 | 2,00E-02 | -1,14 | 6,02E-02 | 9,21 | 2,18E-02 | 1  | <i>SRM</i>     | spermidine synthase                                                              |
| 7990582 | 1,11  | 3,70E-01 | 1,06  | 4,47E-01 | 1,18  | 2,36E-02 | 7,38 | 3,94E-02 | 15 | <i>SCAPER</i>  | S-phase cyclin A-associated protein in the ER                                    |
| 8055183 | 1,04  | 8,62E-01 | -1,19 | 1,57E-02 | -1,15 | 6,22E-02 | 7,98 | 1,75E-02 | 2  | <i>SMPD4</i>   | sphingomyelin phosphodiesterase 4, neutral membrane (neutral sphingomyelinase-3) |
| 8048717 | -1,14 | 2,97E-02 | -1,01 | 9,34E-01 | -1,15 | 9,59E-03 | 5,73 | 6,37E-03 | 2  | <i>SGPP2</i>   | sphingosine-1-phosphate phosphatase 2                                            |
| 8034043 | 1,36  | 1,14E-02 | -1,17 | 1,81E-01 | 1,16  | 2,55E-01 | 8,48 | 8,75E-03 | 19 | <i>S1PR5</i>   | sphingosine-1-phosphate receptor 5                                               |
| 8173208 | 1,15  | 1,44E-01 | -1,16 | 4,46E-02 | -1,01 | 9,50E-01 | 7,33 | 3,77E-02 | X  | <i>SPIN4</i>   | spindlin family, member 4                                                        |
| 8035581 | 1,17  | 1,60E-02 | -1,05 | 4,85E-01 | 1,12  | 8,39E-02 | 7,82 | 1,08E-02 | 19 | <i>SFRS14</i>  | splicing factor, arginine/serine-rich 14                                         |
| 8098870 | 1,74  | 8,77E-03 | -1,35 | 1,28E-01 | 1,28  | 2,79E-01 | 7,81 | 6,05E-03 | 4  | <i>SPON2</i>   | spondin 2, extracellular matrix protein                                          |
| 7956257 | 1,03  | 8,96E-01 | -1,19 | 2,48E-02 | -1,15 | 7,74E-02 | 7,25 | 2,86E-02 | 12 | <i>SPRYD4</i>  | SPRY domain containing 4                                                         |

|         |       |          |       |          |       |          |       |          |    |                |                                                                                                   |
|---------|-------|----------|-------|----------|-------|----------|-------|----------|----|----------------|---------------------------------------------------------------------------------------------------|
| 8138689 | -1,05 | 8,12E-01 | 1,22  | 1,61E-02 | 1,16  | 9,16E-02 | 10,33 | 2,06E-02 | 7  | <i>SKAP2</i>   | src kinase associated phosphoprotein 2                                                            |
| 8066038 | 1,31  | 8,77E-03 | -1,21 | 4,39E-02 | 1,08  | 5,82E-01 | 8,82  | 4,84E-03 | 20 | <i>SLA2</i>    | Src-like-adaptor 2                                                                                |
| 8021349 | 1,00  | 9,94E-01 | 1,11  | 4,31E-02 | 1,11  | 4,27E-02 | 3,70  | 3,30E-02 | 18 | <i>ST8SIA3</i> | ST8 alpha-N-acetyl-neuraminide alpha-2,8-sialyltransferase 3                                      |
| 8135876 | 1,12  | 1,16E-01 | -1,13 | 3,17E-02 | -1,01 | 9,28E-01 | 9,05  | 2,56E-02 | 7  | <i>SND1</i>    | staphylococcal nuclease and tudor domain containing 1                                             |
| 8053890 | 1,06  | 6,42E-01 | -1,22 | 8,98E-04 | -1,16 | 4,88E-03 | 9,79  | 2,05E-04 | 2  | <i>STARD7</i>  | StAR-related lipid transfer (START) domain containing 7                                           |
| 8129482 | 1,38  | 6,63E-02 | -1,05 | 7,99E-01 | 1,31  | 8,51E-02 | 8,42  | 3,37E-02 | 6  | <i>SAMD3</i>   | sterile alpha motif domain containing 3                                                           |
| 7928516 | -1,08 | 6,94E-01 | 1,31  | 2,85E-03 | 1,21  | 2,69E-02 | 8,62  | 2,17E-03 | 10 | <i>SAMD8</i>   | sterile alpha motif domain containing 8                                                           |
| 8160968 | 1,11  | 4,18E-01 | -1,18 | 2,93E-02 | -1,07 | 5,47E-01 | 8,47  | 4,57E-02 | 9  | <i>STOML2</i>  | stomatin (EPB72)-like 2                                                                           |
| 8133215 | 1,19  | 6,60E-02 | -1,11 | 2,33E-01 | 1,07  | 5,12E-01 | 7,03  | 4,86E-02 | 7  | <i>STAG3LA</i> | stromal antigen 3-like 4                                                                          |
| 7937900 | 1,05  | 7,19E-01 | -1,13 | 2,52E-02 | -1,08 | 2,25E-01 | 8,55  | 4,03E-02 | 11 | <i>STIM1</i>   | stromal interaction molecule 1                                                                    |
| 8019877 | -1,02 | 9,33E-01 | 1,18  | 2,57E-02 | 1,15  | 5,82E-02 | 11,26 | 2,63E-02 | 18 | <i>SMCHD1</i>  | structural maintenance of chromosomes flexible hinge domain containing 1                          |
| 7948192 | 1,03  | 8,78E-01 | -1,15 | 3,23E-02 | -1,12 | 1,19E-01 | 7,11  | 4,24E-02 | 11 | <i>SSRP1</i>   | structure specific recognition protein 1                                                          |
| 8091811 | 1,02  | 8,84E-01 | 1,07  | 8,72E-02 | 1,08  | 3,06E-02 | 3,15  | 3,95E-02 | 3  | <i>SI</i>      | sucrase-isomaltase (alpha-glucosidase)                                                            |
| 7962760 | 1,01  | 9,60E-01 | -1,15 | 3,45E-02 | -1,14 | 5,86E-02 | 8,78  | 3,35E-02 | 12 | <i>SENPI</i>   | SUMO1/sentrin specific peptidase 1                                                                |
| 8167347 | -1,02 | 9,13E-01 | -1,11 | 6,01E-02 | -1,13 | 2,69E-02 | 6,41  | 3,09E-02 | X  | <i>SUV39H1</i> | suppressor of variegation 3-9 homolog 1 (Drosophila)                                              |
| 8163383 | 1,18  | 7,34E-02 | -1,13 | 1,16E-01 | 1,04  | 7,58E-01 | 9,06  | 4,24E-02 | 9  | <i>SUSDI</i>   | sushi domain containing 1                                                                         |
| 7966172 | 1,04  | 7,64E-01 | 1,09  | 1,52E-01 | 1,14  | 2,69E-02 | 4,92  | 4,41E-02 | 12 | <i>SVOP</i>    | SV2 related protein homolog (rat)                                                                 |
| 7955331 | 1,02  | 8,82E-01 | -1,16 | 7,12E-03 | -1,13 | 1,89E-02 | 8,50  | 4,84E-03 | 12 | <i>SMARCD1</i> | SWI/SNF related, matrix associated, actin dependent regulator of chromatin, subfamily d, member 1 |
| 8017460 | -1,01 | 9,70E-01 | -1,11 | 6,39E-02 | -1,12 | 5,34E-02 | 8,12  | 4,90E-02 | 17 | <i>SMARCD2</i> | SWI/SNF related, matrix associated, actin dependent regulator of chromatin, subfamily d, member 2 |
| 8123006 | 1,10  | 3,11E-01 | -1,15 | 2,39E-02 | -1,05 | 6,08E-01 | 6,75  | 3,33E-02 | 6  | <i>SYNJ2</i>   | synaptojanin 2                                                                                    |
| 7950810 | 1,49  | 2,66E-03 | -1,13 | 3,59E-01 | 1,32  | 1,79E-02 | 6,25  | 8,04E-04 | 11 | <i>SYTL2</i>   | synaptotagmin-like 2                                                                              |
| 8063839 | -1,02 | 9,02E-01 | 1,10  | 2,84E-02 | 1,09  | 8,55E-02 | 6,39  | 3,39E-02 | 20 | <i>SS18L1</i>  | synovial sarcoma translocation gene on chromosome 18-like 1                                       |
| 7948864 | 1,01  | 9,61E-01 | -1,13 | 2,78E-02 | -1,12 | 4,47E-02 | 8,60  | 2,47E-02 | 11 | <i>STX5</i>    | syntaxin 5                                                                                        |

|         |       |          |       |          |       |          |       |          |    |                |                                                                                  |
|---------|-------|----------|-------|----------|-------|----------|-------|----------|----|----------------|----------------------------------------------------------------------------------|
| 8016600 | -1,01 | 9,70E-01 | 1,15  | 4,05E-02 | 1,14  | 6,33E-02 | 6,29  | 3,94E-02 | 17 | <i>TAC4</i>    | tachykinin 4 (hemokinin)                                                         |
| 8006573 | 1,12  | 1,61E-01 | 1,08  | 2,39E-01 | 1,20  | 1,36E-03 | 8,89  | 3,56E-03 | 17 | <i>TAF15</i>   | TAF15 RNA polymerase II, TATA box binding protein (TBP)-associated factor, 68kDa |
| 8141425 | 1,04  | 8,10E-01 | -1,15 | 1,18E-02 | -1,11 | 6,17E-02 | 7,53  | 1,25E-02 | 7  | <i>TAF6</i>    | TAF6 RNA polymerase II, TATA box binding protein (TBP)-associated factor, 80kDa  |
| 7901091 | -1,04 | 8,32E-01 | -1,15 | 6,49E-02 | -1,20 | 1,36E-02 | 7,82  | 2,04E-02 | 1  | <i>TOE1</i>    | target of EGR1, member 1 (nuclear)                                               |
| 7961275 | 1,32  | 8,45E-03 | 1,04  | 7,59E-01 | 1,37  | 7,28E-04 | 4,14  | 6,87E-04 | 12 | <i>TAS2R13</i> | taste receptor, type 2, member 13                                                |
| 7961279 | 1,61  | 3,22E-03 | 1,08  | 6,82E-01 | 1,74  | 1,07E-04 | 6,09  | 1,40E-04 | 12 | <i>TAS2R14</i> | taste receptor, type 2, member 14                                                |
| 7961287 | 1,58  | 3,88E-02 | 1,05  | 8,58E-01 | 1,66  | 9,28E-03 | 5,57  | 7,63E-03 | 12 | <i>TAS2R19</i> | taste receptor, type 2, member 19                                                |
| 7961285 | 1,68  | 3,22E-03 | -1,01 | 9,72E-01 | 1,66  | 1,30E-03 | 5,42  | 5,13E-04 | 12 | <i>TAS2R20</i> | taste receptor, type 2, member 20                                                |
| 7961291 | 1,47  | 8,27E-02 | 1,01  | 9,69E-01 | 1,48  | 3,52E-02 | 5,62  | 2,52E-02 | 12 | <i>TAS2R31</i> | taste receptor, type 2, member 31                                                |
| 8136645 | 1,27  | 3,35E-01 | 1,24  | 2,03E-01 | 1,58  | 3,67E-03 | 5,17  | 8,53E-03 | 7  | <i>TAS2R4</i>  | taste receptor, type 2, member 4                                                 |
| 8180320 | 1,06  | 9,02E-01 | 1,45  | 2,46E-02 | 1,54  | 6,98E-03 | 5,04  | 7,70E-03 | 12 | <i>TAS2R45</i> | taste receptor, type 2, member 45                                                |
| 7961293 | 1,43  | 1,14E-01 | 1,12  | 6,05E-01 | 1,60  | 8,66E-03 | 3,56  | 1,18E-02 | 12 | <i>TAS2R46</i> | taste receptor, type 2, member 46                                                |
| 8136647 | 1,12  | 2,78E-01 | 1,07  | 4,22E-01 | 1,20  | 1,26E-02 | 5,40  | 2,21E-02 | 7  | <i>TAS2R5</i>  | taste receptor, type 2, member 5                                                 |
| 7961281 | 1,57  | 9,51E-03 | 1,02  | 9,31E-01 | 1,61  | 2,48E-03 | 4,82  | 1,67E-03 | 12 | <i>TAS2R50</i> | taste receptor, type 2, member 50                                                |
| 8158406 | 1,07  | 4,04E-01 | -1,11 | 2,93E-02 | -1,04 | 5,61E-01 | 8,20  | 4,51E-02 | 9  | <i>TBC1D13</i> | TBC1 domain family, member 13                                                    |
| 8094476 | 1,27  | 2,25E-02 | -1,10 | 3,79E-01 | 1,16  | 1,65E-01 | 7,04  | 1,73E-02 | 4  | <i>TBC1D19</i> | TBC1 domain family, member 19                                                    |
| 8064336 | 1,07  | 4,98E-01 | -1,17 | 8,75E-03 | -1,09 | 1,85E-01 | 8,70  | 1,02E-02 | 20 | <i>TBC1D20</i> | TBC1 domain family, member 20                                                    |
| 8116348 | 1,08  | 4,98E-01 | -1,17 | 1,57E-02 | -1,08 | 3,17E-01 | 7,40  | 2,39E-02 | 5  | <i>TBC1D9B</i> | TBC1 domain family, member 9B (with GRAM domain)                                 |
| 8092627 | 1,13  | 1,47E-01 | -1,13 | 5,72E-02 | -1,00 | 9,90E-01 | 7,17  | 4,68E-02 | 3  | <i>TBCCD1</i>  | TBCC domain containing 1                                                         |
| 8008029 | 1,36  | 2,70E-02 | -1,23 | 1,12E-01 | 1,11  | 5,56E-01 | 7,82  | 1,86E-02 | 17 | <i>TBX21</i>   | T-box 21                                                                         |
| 8180367 | 1,28  | 2,10E-01 | -1,42 | 1,57E-02 | -1,11 | 6,29E-01 | 10,51 | 1,88E-02 | 7  | <i>TARP</i>    | TCR gamma alternate reading frame protein                                        |
| 7935251 | 1,10  | 4,22E-01 | -1,23 | 4,07E-03 | -1,12 | 1,26E-01 | 7,84  | 4,28E-03 | 10 | <i>TCTN3</i>   | tectonic family member 3                                                         |
| 8002289 | 1,00  | 9,84E-01 | -1,09 | 3,63E-02 | -1,08 | 4,95E-02 | 7,99  | 3,21E-02 | 16 | <i>TERF2</i>   | telomeric repeat binding factor 2                                                |

|         |       |          |       |          |       |          |       |          |    |                     |                                                                        |
|---------|-------|----------|-------|----------|-------|----------|-------|----------|----|---------------------|------------------------------------------------------------------------|
| 8135585 | 1,29  | 2,27E-01 | 1,09  | 6,24E-01 | 1,41  | 2,38E-02 | 5,89  | 3,30E-02 | 7  | <i>LOC100128868</i> | testin-related protein TRG                                             |
| 8135576 | 1,17  | 7,90E-03 | -1,08 | 2,04E-01 | 1,09  | 1,62E-01 | 10,48 | 5,21E-03 | 7  | <i>TES</i>          | testis derived transcript (3 LIM domains)                              |
| 8052925 | -1,02 | 9,36E-01 | -1,13 | 3,62E-02 | -1,15 | 1,64E-02 | 8,88  | 1,71E-02 | 2  | <i>TEX261</i>       | testis expressed 261                                                   |
| 7915718 | -1,10 | 2,63E-01 | -1,05 | 4,48E-01 | -1,16 | 1,30E-02 | 7,79  | 2,27E-02 | 1  | <i>TESK2</i>        | testis-specific kinase 2                                               |
| 7928705 | 1,03  | 8,41E-01 | -1,15 | 1,75E-02 | -1,11 | 8,41E-02 | 9,96  | 2,22E-02 | 10 | <i>TSPAN14</i>      | tetraspanin 14                                                         |
| 7956613 | 1,06  | 7,27E-01 | -1,19 | 1,02E-02 | -1,13 | 8,14E-02 | 8,98  | 1,08E-02 | 12 | <i>TSPAN31</i>      | tetraspanin 31                                                         |
| 7937782 | 1,20  | 1,77E-02 | -1,07 | 3,46E-01 | 1,12  | 1,58E-01 | 8,44  | 1,37E-02 | 11 | <i>TSPAN32</i>      | tetraspanin 32                                                         |
| 8056995 | -1,23 | 8,56E-02 | 1,03  | 8,12E-01 | -1,19 | 1,01E-01 | 4,91  | 4,39E-02 | 2  | <i>TTC30B</i>       | tetratricopeptide repeat domain 30B                                    |
| 8042874 | 1,11  | 3,14E-01 | -1,17 | 2,21E-02 | -1,05 | 5,87E-01 | 6,99  | 3,09E-02 | 2  | <i>TTC31</i>        | tetratricopeptide repeat domain 31                                     |
| 8073842 | 1,49  | 3,11E-03 | -1,22 | 1,19E-01 | 1,23  | 1,29E-01 | 7,64  | 1,72E-03 | 22 | <i>TTC38</i>        | tetratricopeptide repeat domain 38                                     |
| 7996675 | 1,02  | 8,89E-01 | -1,14 | 1,74E-02 | -1,11 | 5,84E-02 | 8,25  | 1,96E-02 | 16 | <i>THAP11</i>       | THAP domain containing 11                                              |
| 7904726 | -1,03 | 6,62E-01 | -1,04 | 2,36E-01 | -1,07 | 2,81E-02 | 13,18 | 4,93E-02 | 1  | <i>TXNIP</i>        | thioredoxin interacting protein                                        |
| 7976037 | -1,11 | 4,71E-02 | 1,05  | 2,96E-01 | -1,05 | 3,64E-01 | 4,04  | 3,77E-02 | 14 | <i>TSHR</i>         | thyroid stimulating hormone receptor                                   |
| 8026341 | 1,01  | 9,48E-01 | -1,14 | 2,19E-02 | -1,12 | 4,19E-02 | 9,58  | 1,97E-02 | 19 | <i>TECR</i>         | trans-2,3-enoyl-CoA reductase                                          |
| 8101622 | 1,12  | 2,13E-01 | -1,22 | 4,78E-03 | -1,09 | 3,12E-01 | 9,00  | 4,79E-03 | 19 | <i>TECR</i>         | trans-2,3-enoyl-CoA reductase                                          |
| 8016739 | -1,14 | 5,25E-01 | -1,14 | 2,71E-01 | -1,30 | 1,80E-02 | 9,59  | 3,44E-02 | 17 | <i>TOB1</i>         | transducer of ERBB2, 1                                                 |
| 8139468 | 1,12  | 2,02E-01 | -1,15 | 4,39E-02 | -1,02 | 8,89E-01 | 7,65  | 4,56E-02 | 7  | <i>TBRG4</i>        | transforming growth factor beta regulator 4                            |
| 7917649 | 1,64  | 1,09E-02 | -1,34 | 1,04E-01 | 1,22  | 3,87E-01 | 8,63  | 7,70E-03 | 1  | <i>TGFBR3</i>       | transforming growth factor, beta receptor III                          |
| 7971104 | -1,08 | 2,24E-01 | 1,10  | 4,25E-02 | 1,02  | 8,59E-01 | 3,84  | 4,66E-02 | 13 | <i>TRPC4</i>        | transient receptor potential cation channel, subfamily C, member 4     |
| 8005171 | 1,22  | 1,16E-02 | -1,16 | 4,59E-02 | 1,05  | 6,38E-01 | 7,49  | 6,52E-03 | 17 | <i>TRPV2</i>        | transient receptor potential cation channel, subfamily V, member 2     |
| 8003627 | 1,05  | 7,50E-01 | -1,16 | 2,47E-02 | -1,10 | 1,97E-01 | 8,79  | 3,83E-02 | 17 | <i>TIMM22</i>       | translocase of inner mitochondrial membrane 22 homolog (yeast)         |
| 8028705 | 1,06  | 6,26E-01 | -1,14 | 2,48E-02 | -1,07 | 3,09E-01 | 8,48  | 4,09E-02 | 19 | <i>TIMM50</i>       | translocase of inner mitochondrial membrane 50 homolog (S. cerevisiae) |

|         |       |          |       |          |       |          |       |          |    |                 |                                                                |
|---------|-------|----------|-------|----------|-------|----------|-------|----------|----|-----------------|----------------------------------------------------------------|
| 8073032 | -1,00 | 9,98E-01 | -1,21 | 3,30E-03 | -1,21 | 1,29E-03 | 6,72  | 6,92E-04 | 22 | <i>TOMM22</i>   | translocase of outer mitochondrial membrane 22 homolog (yeast) |
| 7978166 | 1,01  | 9,50E-01 | -1,15 | 1,66E-02 | -1,13 | 3,06E-02 | 8,79  | 1,42E-02 | 14 | <i>TM9SF1</i>   | transmembrane 9 superfamily member 1                           |
| 7955277 | -1,02 | 9,05E-01 | -1,12 | 3,90E-02 | -1,15 | 1,32E-02 | 11,89 | 1,56E-02 | 12 | <i>TMBIM6</i>   | transmembrane BAX inhibitor motif containing 6                 |
| 8010212 | 1,14  | 1,02E-01 | -1,13 | 7,75E-02 | 1,02  | 9,15E-01 | 9,24  | 4,41E-02 | 17 | <i>TMC8</i>     | transmembrane channel-like 8                                   |
| 8012383 | 1,04  | 7,88E-01 | -1,14 | 1,82E-02 | -1,10 | 1,22E-01 | 6,63  | 2,56E-02 | 17 | <i>TMEM107</i>  | transmembrane protein 107                                      |
| 7940372 | 1,09  | 5,75E-01 | -1,24 | 6,22E-03 | -1,14 | 1,02E-01 | 9,75  | 6,48E-03 | 11 | <i>TMEM109</i>  | transmembrane protein 109                                      |
| 8087685 | -1,02 | 9,08E-01 | -1,12 | 5,68E-02 | -1,14 | 2,43E-02 | 8,49  | 2,77E-02 | 3  | <i>TMEM115</i>  | transmembrane protein 115                                      |
| 7954985 | 1,14  | 8,40E-02 | -1,11 | 1,04E-01 | 1,03  | 8,19E-01 | 5,63  | 4,48E-02 | 12 | <i>TMEM117</i>  | transmembrane protein 117                                      |
| 7940473 | 1,10  | 5,51E-02 | -1,15 | 1,18E-03 | -1,05 | 2,89E-01 | 8,68  | 6,92E-04 | 11 | <i>TMEM138</i>  | transmembrane protein 138                                      |
| 8091546 | 1,21  | 5,44E-01 | 1,26  | 1,71E-01 | 1,52  | 8,83E-03 | 6,41  | 1,81E-02 | 3  | <i>TMEM14E</i>  | transmembrane protein 14E                                      |
| 8114536 | 1,09  | 5,06E-01 | -1,18 | 2,29E-02 | -1,08 | 4,03E-01 | 8,78  | 3,65E-02 | 5  | <i>TMEM173</i>  | transmembrane protein 173                                      |
| 8123062 | 1,25  | 4,30E-03 | -1,13 | 1,07E-01 | 1,11  | 2,16E-01 | 9,21  | 3,06E-03 | 6  | <i>TMEM181</i>  | transmembrane protein 181                                      |
| 8175621 | 1,04  | 8,47E-01 | -1,18 | 2,24E-02 | -1,13 | 1,02E-01 | 7,25  | 2,87E-02 | X  | <i>TMEM185A</i> | transmembrane protein 185A                                     |
| 8165486 | 1,02  | 9,45E-01 | -1,20 | 6,22E-03 | -1,18 | 8,04E-03 | 8,27  | 3,06E-03 | 9  | <i>TMEM203</i>  | transmembrane protein 203                                      |
| 8142912 | 1,01  | 9,56E-01 | -1,20 | 1,03E-02 | -1,19 | 1,28E-02 | 9,34  | 5,23E-03 | 7  | <i>TMEM209</i>  | transmembrane protein 209                                      |
| 7899675 | 1,06  | 5,17E-01 | -1,12 | 2,44E-02 | -1,05 | 4,10E-01 | 7,28  | 3,94E-02 | 1  | <i>TMEM39B</i>  | transmembrane protein 39B                                      |
| 8092534 | 1,11  | 2,83E-01 | -1,15 | 3,86E-02 | -1,03 | 7,68E-01 | 7,70  | 4,96E-02 | 3  | <i>TMEM41A</i>  | transmembrane protein 41A                                      |
| 7901135 | -1,04 | 8,35E-01 | -1,15 | 4,97E-02 | -1,20 | 9,77E-03 | 8,10  | 1,43E-02 | 1  | <i>TMEM69</i>   | transmembrane protein 69                                       |
| 7982507 | 1,11  | 2,52E-01 | -1,17 | 1,81E-02 | -1,05 | 6,08E-01 | 9,69  | 2,39E-02 | 15 | <i>TMEM85</i>   | transmembrane protein 85                                       |
| 8040365 | 1,09  | 6,63E-01 | -1,21 | 2,70E-02 | -1,12 | 2,94E-01 | 8,63  | 4,49E-02 | 2  | <i>TRIB2</i>    | tribbles homolog 2 (Drosophila)                                |
| 8162729 | 1,10  | 3,54E-01 | -1,17 | 2,44E-02 | -1,06 | 5,67E-01 | 8,35  | 3,53E-02 | 9  | <i>TRIM14</i>   | tripartite motif-containing 14                                 |
| 7938057 | -1,19 | 4,94E-02 | 1,09  | 2,73E-01 | -1,09 | 4,03E-01 | 4,30  | 3,94E-02 | 11 | <i>TRIM22</i>   | tripartite motif-containing 22                                 |
| 7911218 | -1,04 | 9,39E-01 | -1,29 | 5,34E-02 | -1,33 | 2,95E-02 | 10,63 | 3,09E-02 | 1  | <i>TRIM58</i>   | tripartite motif-containing 58                                 |

|         |       |          |       |          |       |          |       |          |    |                  |                                                                                           |
|---------|-------|----------|-------|----------|-------|----------|-------|----------|----|------------------|-------------------------------------------------------------------------------------------|
| 7945979 | 1,07  | 7,53E-01 | -1,23 | 2,71E-02 | -1,14 | 2,09E-01 | 7,52  | 4,29E-02 | 11 | <i>TRIM68</i>    | tripartite motif-containing 68                                                            |
| 7908147 | 1,16  | 6,93E-02 | -1,02 | 7,85E-01 | 1,13  | 9,14E-02 | 8,04  | 3,53E-02 | 1  | <i>TSEN15</i>    | tRNA splicing endonuclease 15 homolog ( <i>S. cerevisiae</i> )                            |
| 8009832 | 1,27  | 3,50E-03 | -1,14 | 8,06E-02 | 1,11  | 2,47E-01 | 7,87  | 2,52E-03 | 17 | <i>TSEN54</i>    | tRNA splicing endonuclease 54 homolog ( <i>S. cerevisiae</i> )                            |
| 7920472 | 1,08  | 7,65E-01 | 1,19  | 9,20E-02 | 1,28  | 1,28E-02 | 7,54  | 2,18E-02 | 1  | <i>TPM3</i>      | tropomyosin 3                                                                             |
| 8129099 | -1,02 | 9,19E-01 | -1,10 | 6,54E-02 | -1,12 | 3,15E-02 | 9,88  | 3,53E-02 | 6  | <i>TSPYL1</i>    | TSPY-like 1                                                                               |
| 8129089 | -1,07 | 5,36E-01 | -1,07 | 2,71E-01 | -1,15 | 1,89E-02 | 7,07  | 3,56E-02 | 6  | <i>TSPYL4</i>    | TSPY-like 4                                                                               |
| 8167790 | 1,05  | 8,25E-01 | -1,21 | 1,60E-02 | -1,16 | 8,29E-02 | 7,33  | 1,97E-02 | X  | <i>TSR2</i>      | TSR2, 20S rRNA accumulation, homolog ( <i>S. cerevisiae</i> )                             |
| 8095868 | 1,14  | 3,25E-01 | 1,06  | 5,67E-01 | 1,20  | 3,23E-02 | 4,20  | 4,87E-02 | 4  | <i>UNQ3028</i>   | TSSP3028                                                                                  |
| 7953135 | 1,14  | 3,21E-01 | -1,24 | 1,50E-02 | -1,09 | 4,71E-01 | 6,59  | 2,03E-02 | 12 | <i>TULP3</i>     | tubby like protein 3                                                                      |
| 8179174 | 1,02  | 9,13E-01 | -1,12 | 3,91E-02 | -1,10 | 1,09E-01 | 11,51 | 4,90E-02 | 6  | <i>TUBB</i>      | tubulin, beta                                                                             |
| 8007302 | 1,07  | 5,23E-01 | -1,19 | 3,76E-03 | -1,11 | 7,81E-02 | 7,88  | 3,70E-03 | 17 | <i>TUBG1</i>     | tubulin, gamma 1                                                                          |
| 8007312 | 1,04  | 8,00E-01 | -1,14 | 2,41E-02 | -1,09 | 1,48E-01 | 6,79  | 3,47E-02 | 17 | <i>TUBG2</i>     | tubulin, gamma 2                                                                          |
| 8163629 | -1,12 | 3,90E-01 | -1,08 | 3,62E-01 | -1,21 | 1,65E-02 | 9,88  | 3,08E-02 | 9  | <i>TNFSF8</i>    | tumor necrosis factor (ligand) superfamily, member 8                                      |
| 8149749 | -1,16 | 1,47E-02 | -1,02 | 7,87E-01 | -1,19 | 1,83E-03 | 7,64  | 1,88E-03 | 8  | <i>TNFRSF10D</i> | tumor necrosis factor receptor superfamily, member 10d, decoy with truncated death domain |
| 8012257 | 1,07  | 7,27E-01 | -1,20 | 2,17E-02 | -1,13 | 1,87E-01 | 8,92  | 3,29E-02 | 17 | <i>TP53</i>      | tumor protein p53                                                                         |
| 8087669 | 1,22  | 2,25E-02 | -1,13 | 1,21E-01 | 1,08  | 4,90E-01 | 7,32  | 1,64E-02 | 3  | <i>TUSC4</i>     | tumor suppressor candidate 4                                                              |
| 8100210 | 1,38  | 8,77E-03 | -1,08 | 5,52E-01 | 1,28  | 3,55E-02 | 8,55  | 4,84E-03 | 4  | <i>TXK</i>       | TXK tyrosine kinase                                                                       |
| 8075106 | 1,18  | 8,77E-03 | -1,13 | 4,47E-02 | 1,05  | 5,76E-01 | 9,17  | 4,84E-03 | 22 | <i>TPST2</i>     | tyrosylprotein sulfotransferase 2                                                         |
| 7914563 | 1,10  | 3,78E-01 | -1,22 | 7,12E-03 | -1,10 | 2,35E-01 | 8,17  | 8,26E-03 | 1  | <i>YARS</i>      | tyrosyl-tRNA synthetase                                                                   |
| 8167924 | -1,03 | 8,25E-01 | -1,08 | 6,48E-02 | -1,11 | 1,28E-02 | 9,35  | 1,93E-02 | X  | <i>UBQLN2</i>    | ubiquilin 2                                                                               |
| 8087100 | 1,01  | 9,71E-01 | -1,14 | 3,81E-02 | -1,13 | 5,92E-02 | 6,98  | 3,56E-02 | 3  | <i>UQCRC1</i>    | ubiquinol-cytochrome c reductase core protein I                                           |
| 7993872 | -1,00 | 9,85E-01 | -1,10 | 2,68E-02 | -1,10 | 2,12E-02 | 10,53 | 1,64E-02 | 16 | <i>UQCRC2</i>    | ubiquinol-cytochrome c reductase core protein II                                          |
| 7905700 | 1,01  | 9,26E-01 | -1,10 | 2,98E-02 | -1,09 | 7,26E-02 | 9,79  | 3,32E-02 | 1  | <i>UBAP2L</i>    | ubiquitin associated protein 2-like                                                       |

|         |       |          |       |          |       |          |       |          |    |                |                                                                   |
|---------|-------|----------|-------|----------|-------|----------|-------|----------|----|----------------|-------------------------------------------------------------------|
| 7976336 | -1,00 | 9,96E-01 | -1,23 | 3,39E-02 | -1,23 | 3,35E-02 | 7,07  | 2,43E-02 | 14 | <i>UBR7</i>    | ubiquitin protein ligase E3 component n-recognin 7 (putative)     |
| 8167125 | 1,17  | 5,77E-02 | -1,20 | 1,17E-02 | -1,03 | 8,22E-01 | 8,52  | 7,27E-03 | X  | <i>USP11</i>   | ubiquitin specific peptidase 11                                   |
| 7906671 | 1,02  | 9,08E-01 | -1,14 | 2,80E-02 | -1,11 | 7,83E-02 | 8,30  | 3,24E-02 | 1  | <i>USP21</i>   | ubiquitin specific peptidase 21                                   |
| 7951752 | 1,28  | 5,19E-02 | -1,26 | 3,51E-02 | 1,01  | 9,62E-01 | 8,31  | 1,79E-02 | 11 | <i>USP28</i>   | ubiquitin specific peptidase 28                                   |
| 8058940 | 1,04  | 8,10E-01 | -1,15 | 2,82E-02 | -1,10 | 1,62E-01 | 7,20  | 4,16E-02 | 2  | <i>USP37</i>   | ubiquitin specific peptidase 37                                   |
| 8043218 | 1,05  | 6,87E-01 | -1,14 | 1,55E-02 | -1,08 | 1,69E-01 | 8,11  | 2,21E-02 | 2  | <i>USP39</i>   | ubiquitin specific peptidase 39                                   |
| 7953483 | 1,10  | 2,40E-01 | -1,20 | 3,68E-03 | -1,09 | 2,21E-01 | 6,93  | 3,54E-03 | 12 | <i>USP5</i>    | ubiquitin specific peptidase 5 (isopeptidase T)                   |
| 8008139 | 1,06  | 6,29E-01 | -1,16 | 1,11E-02 | -1,10 | 1,47E-01 | 9,50  | 1,39E-02 | 17 | <i>UBE2Z</i>   | ubiquitin-conjugating enzyme E2Z                                  |
| 7990361 | 1,06  | 6,48E-01 | -1,20 | 4,93E-03 | -1,13 | 5,99E-02 | 8,91  | 4,77E-03 | 15 | <i>UBL7</i>    | ubiquitin-like 7 (bone marrow stromal cell-derived)               |
| 8087485 | 1,09  | 2,86E-01 | -1,14 | 1,65E-02 | -1,05 | 5,41E-01 | 9,20  | 2,25E-02 | 3  | <i>UBA7</i>    | ubiquitin-like modifier activating enzyme 7                       |
| 8146544 | -1,11 | 6,10E-01 | 1,25  | 2,93E-02 | 1,12  | 3,63E-01 | 9,15  | 4,93E-02 | 8  | <i>UBXN2B</i>  | UBX domain protein 2B                                             |
| 7921806 | -1,01 | 9,64E-01 | -1,16 | 3,73E-02 | -1,18 | 2,59E-02 | 9,10  | 2,25E-02 | 1  | <i>B4GALT3</i> | UDP-Gal:betaGlcNAc beta 1,4- galactosyltransferase, polypeptide 3 |
| 8086352 | 1,19  | 2,36E-02 | 1,01  | 9,15E-01 | 1,21  | 6,97E-03 | 6,60  | 4,73E-03 | 3  | <i>ULK4</i>    | unc-51-like kinase 4 (C. elegans)                                 |
| 7950307 | 1,09  | 3,53E-01 | -1,14 | 3,35E-02 | -1,04 | 6,50E-01 | 11,43 | 4,79E-02 | 11 | <i>UCP2</i>    | uncoupling protein 2 (mitochondrial, proton carrier)              |
| 7958455 | 1,13  | 1,56E-01 | -1,15 | 3,66E-02 | -1,02 | 9,06E-01 | 6,14  | 3,44E-02 | 12 | <i>UNG</i>     | uracil-DNA glycosylase                                            |
| 8067756 | 1,05  | 6,97E-01 | -1,14 | 2,42E-02 | -1,08 | 2,44E-01 | 7,56  | 3,89E-02 | 20 | <i>UCKL1</i>   | uridine-cytidine kinase 1-like 1                                  |
| 7936937 | 1,03  | 8,70E-01 | -1,14 | 3,39E-02 | -1,11 | 1,34E-01 | 7,96  | 4,59E-02 | 10 | <i>UROS</i>    | uroporphyrinogen III synthase                                     |
| 8122464 | 1,17  | 6,54E-02 | 1,02  | 8,36E-01 | 1,20  | 1,36E-02 | 9,71  | 1,26E-02 | 6  | <i>UTRN</i>    | utrophin                                                          |
| 7944382 | 1,10  | 2,37E-01 | -1,19 | 3,87E-03 | -1,08 | 2,45E-01 | 8,94  | 3,92E-03 | 11 | <i>VPS11</i>   | vacuolar protein sorting 11 homolog (S. cerevisiae)               |
| 8007355 | 1,04  | 7,94E-01 | -1,16 | 1,28E-02 | -1,12 | 7,94E-02 | 8,26  | 1,54E-02 | 17 | <i>VPS25</i>   | vacuolar protein sorting 25 homolog (S. cerevisiae)               |
| 7987840 | -1,04 | 6,26E-01 | -1,06 | 2,04E-01 | -1,10 | 1,80E-02 | 9,43  | 3,41E-02 | 15 | <i>VPS39</i>   | vacuolar protein sorting 39 homolog (S. cerevisiae)               |
| 8180123 | 1,15  | 7,80E-02 | -1,15 | 3,79E-02 | 1,00  | 9,95E-01 | 8,92  | 2,36E-02 | 6  | <i>VPS52</i>   | vacuolar protein sorting 52 homolog (S. cerevisiae)               |
| 8036840 | 1,03  | 8,38E-01 | -1,12 | 2,22E-02 | -1,09 | 1,05E-01 | 9,53  | 2,87E-02 | 19 | <i>AKT2</i>    | v-akt murine thymoma viral oncogene homolog 2                     |



|         |       |          |       |          |       |          |      |          |    |                |                                                                                                                |
|---------|-------|----------|-------|----------|-------|----------|------|----------|----|----------------|----------------------------------------------------------------------------------------------------------------|
| 8165658 | -1,02 | 9,56E-01 | -1,24 | 6,73E-02 | -1,28 | 4,62E-02 | 8,15 | 4,64E-02 | 7  | <i>VIPR2</i>   | vasoactive intestinal peptide receptor 2                                                                       |
| 8164967 | -1,10 | 5,13E-01 | -1,12 | 1,74E-01 | -1,24 | 7,83E-03 | 6,77 | 1,64E-02 | 9  | <i>VAV2</i>    | vav 2 guanine nucleotide exchange factor                                                                       |
| 8115732 | 1,08  | 6,05E-01 | 1,19  | 1,81E-02 | 1,29  | 3,31E-04 | 4,99 | 8,09E-04 | 5  | <i>UNQ9374</i> | VCEW 9374                                                                                                      |
| 8055060 | 1,08  | 6,34E-01 | 1,10  | 2,33E-01 | 1,20  | 2,35E-02 | 9,29 | 4,28E-02 | 2  | <i>WDR33</i>   | WD repeat domain 33                                                                                            |
| 8178939 | 1,11  | 1,74E-01 | -1,15 | 2,19E-02 | -1,03 | 7,69E-01 | 7,24 | 2,32E-02 | 6  | <i>WDR46</i>   | WD repeat domain 46                                                                                            |
| 8002802 | 1,10  | 2,26E-01 | -1,13 | 3,02E-02 | -1,03 | 7,79E-01 | 7,61 | 3,53E-02 | 16 | <i>WDR59</i>   | WD repeat domain 59                                                                                            |
| 8021312 | 1,18  | 1,51E-02 | -1,05 | 5,26E-01 | 1,13  | 6,69E-02 | 8,48 | 9,60E-03 | 18 | <i>WDR7</i>    | WD repeat domain 7                                                                                             |
| 7948881 | 1,08  | 6,31E-01 | -1,19 | 2,17E-02 | -1,10 | 2,72E-01 | 8,44 | 3,44E-02 | 11 | <i>WDR74</i>   | WD repeat domain 74                                                                                            |
| 8006906 | 1,29  | 1,48E-02 | -1,16 | 1,41E-01 | 1,12  | 3,67E-01 | 6,48 | 1,15E-02 | 17 | <i>ERBB2</i>   | v-erb-b2 erythroblastic leukemia viral oncogene homolog 2, neuro/glioblastoma derived oncogene homolog (avian) |
| 7930524 | 1,12  | 6,15E-02 | 1,05  | 4,29E-01 | 1,17  | 1,52E-03 | 7,93 | 3,06E-03 | 10 | <i>VTIIA</i>   | vesicle transport through interaction with t-SNAREs homolog 1A (yeast)                                         |
| 8068593 | -1,29 | 2,23E-02 | 1,13  | 2,70E-01 | -1,15 | 2,49E-01 | 8,81 | 1,75E-02 | 21 | <i>ETS2</i>    | v-ets erythroblastosis virus E26 oncogene homolog 2 (avian)                                                    |
| 8000998 | 1,08  | 5,61E-01 | -1,17 | 1,66E-02 | -1,09 | 2,83E-01 | 9,70 | 2,64E-02 | 16 | <i>VKORC1</i>  | vitamin K epoxide reductase complex, subunit 1                                                                 |
| 8066266 | -1,21 | 7,07E-02 | 1,05  | 6,87E-01 | -1,16 | 1,33E-01 | 7,70 | 4,15E-02 | 20 | <i>MAFB</i>    | v-maf musculoaponeurotic fibrosarcoma oncogene homolog B (avian)                                               |
| 8122202 | -1,08 | 6,16E-01 | -1,11 | 1,70E-01 | -1,20 | 1,28E-02 | 7,54 | 2,48E-02 | 6  | <i>MYB</i>     | v-myb myeloblastosis viral oncogene homolog (avian)                                                            |
| 8151101 | 1,62  | 3,22E-03 | -1,19 | 2,64E-01 | 1,35  | 5,08E-02 | 9,07 | 1,85E-03 | 8  | <i>MYBL1</i>   | v-myb myeloblastosis viral oncogene homolog (avian)-like 1                                                     |
| 8053599 | 1,02  | 9,09E-01 | -1,12 | 2,00E-02 | -1,10 | 5,33E-02 | 8,61 | 2,03E-02 | 2  | <i>WBPI</i>    | WW domain binding protein 1                                                                                    |
| 8033392 | 1,09  | 3,52E-01 | -1,17 | 1,12E-02 | -1,07 | 3,46E-01 | 8,48 | 1,39E-02 | 19 | <i>XAB2</i>    | XPA binding protein 2                                                                                          |
| 7936284 | 1,18  | 5,19E-02 | -1,20 | 1,47E-02 | -1,02 | 9,02E-01 | 8,58 | 8,91E-03 | 10 | <i>XPNPEP1</i> | X-prolyl aminopeptidase (aminopeptidase P) 1, soluble                                                          |
| 7949577 | 1,03  | 8,59E-01 | -1,14 | 1,41E-02 | -1,11 | 5,60E-02 | 7,90 | 1,49E-02 | 11 | <i>YIF1A</i>   | Yip1 interacting factor homolog A ( <i>S. cerevisiae</i> )                                                     |
| 8074780 | 1,32  | 1,13E-02 | -1,24 | 3,61E-02 | 1,07  | 6,89E-01 | 7,70 | 5,45E-03 | 22 | <i>YPEL1</i>   | yippee-like 1 ( <i>Drosophila</i> )                                                                            |
| 8008819 | -1,15 | 4,94E-02 | -1,01 | 8,89E-01 | -1,17 | 1,37E-02 | 8,90 | 1,12E-02 | 17 | <i>YPEL2</i>   | yippee-like 2 ( <i>Drosophila</i> )                                                                            |
| 8067593 | -1,03 | 7,69E-01 | -1,07 | 1,47E-01 | -1,11 | 2,69E-02 | 9,18 | 4,36E-02 | 20 | <i>YTHDF1</i>  | YTH domain family, member 1                                                                                    |
| 8043725 | 1,29  | 1,83E-02 | -1,22 | 4,97E-02 | 1,06  | 7,00E-01 | 9,01 | 9,68E-03 | 2  | <i>ZAP70</i>   | zeta-chain (TCR) associated protein kinase 70kDa                                                               |

|         |       |          |       |          |       |          |       |          |    |                |                                                   |
|---------|-------|----------|-------|----------|-------|----------|-------|----------|----|----------------|---------------------------------------------------|
| 8132062 | 1,06  | 4,47E-01 | 1,05  | 2,94E-01 | 1,12  | 1,43E-02 | 8,61  | 2,78E-02 | 7  | <i>ZNRF2</i>   | zinc and ring finger 2                            |
| 8089701 | 1,22  | 1,13E-01 | 1,02  | 8,59E-01 | 1,25  | 2,78E-02 | 7,64  | 2,52E-02 | 3  | <i>ZBTB20</i>  | zinc finger and BTB domain containing 20          |
| 7907486 | 1,13  | 2,39E-01 | 1,11  | 1,46E-01 | 1,26  | 1,13E-03 | 7,37  | 3,11E-03 | 1  | <i>ZBTB37</i>  | zinc finger and BTB domain containing 37          |
| 8073397 | 1,05  | 4,51E-01 | -1,13 | 4,22E-03 | -1,07 | 1,19E-01 | 8,43  | 4,54E-03 | 22 | <i>ZC3H7B</i>  | zinc finger CCCH-type containing 7B               |
| 8055639 | 1,56  | 1,95E-02 | 1,30  | 1,48E-01 | 2,02  | 2,90E-05 | 6,89  | 1,22E-04 | 2  | <i>ZEB2</i>    | zinc finger E-box binding homeobox 2              |
| 8143733 | 1,13  | 2,35E-01 | 1,05  | 6,08E-01 | 1,19  | 2,36E-02 | 7,83  | 3,34E-02 | 7  | <i>ZNF767</i>  | zinc finger family member 767                     |
| 7923183 | -1,24 | 2,06E-02 | 1,03  | 8,12E-01 | -1,21 | 2,68E-02 | 8,78  | 8,36E-03 | 1  | <i>ZNF281</i>  | zinc finger protein 281                           |
| 8120992 | 1,01  | 9,54E-01 | 1,12  | 5,27E-02 | 1,14  | 3,42E-02 | 9,43  | 3,37E-02 | 6  | <i>ZNF292</i>  | zinc finger protein 292                           |
| 8065517 | 1,17  | 8,56E-02 | -1,02 | 8,37E-01 | 1,14  | 9,23E-02 | 6,81  | 4,19E-02 | 20 | <i>ZNF337</i>  | zinc finger protein 337                           |
| 8028652 | -1,24 | 2,06E-02 | -1,01 | 9,56E-01 | -1,25 | 7,58E-03 | 10,48 | 4,54E-03 | 19 | <i>ZFP36</i>   | zinc finger protein 36, C3H type, homolog (mouse) |
| 7899870 | 1,03  | 8,77E-01 | -1,15 | 2,68E-02 | -1,11 | 1,01E-01 | 8,01  | 3,43E-02 | 1  | <i>ZNF362</i>  | zinc finger protein 362                           |
| 7975645 | 1,07  | 6,21E-01 | -1,16 | 2,26E-02 | -1,08 | 2,90E-01 | 7,93  | 3,62E-02 | 14 | <i>ZNF410</i>  | zinc finger protein 410                           |
| 8040985 | -1,11 | 4,56E-01 | -1,08 | 4,01E-01 | -1,19 | 2,87E-02 | 8,38  | 4,90E-02 | 2  | <i>ZNF512</i>  | zinc finger protein 512                           |
| 8099364 | -1,17 | 9,76E-02 | 1,01  | 9,33E-01 | -1,15 | 6,85E-02 | 8,52  | 3,94E-02 | 4  | <i>ZNF518B</i> | zinc finger protein 518B                          |
| 8029182 | -1,01 | 9,58E-01 | -1,13 | 2,42E-02 | -1,15 | 1,29E-02 | 7,03  | 1,14E-02 | 19 | <i>ZNF574</i>  | zinc finger protein 574                           |
| 8031522 | -1,07 | 4,93E-01 | -1,06 | 2,97E-01 | -1,13 | 1,80E-02 | 6,44  | 3,43E-02 | 19 | <i>ZNF581</i>  | zinc finger protein 581                           |
| 8067094 | 1,03  | 8,21E-01 | -1,13 | 2,83E-02 | -1,09 | 1,52E-01 | 6,69  | 4,09E-02 | 20 | <i>ZFP64</i>   | zinc finger protein 64 homolog (mouse)            |
| 7900461 | 1,09  | 3,58E-01 | -1,15 | 1,65E-02 | -1,06 | 4,60E-01 | 4,53  | 2,40E-02 | 1  | <i>ZNF684</i>  | zinc finger protein 684                           |
| 8073943 | -1,12 | 1,44E-01 | -1,04 | 5,69E-01 | -1,16 | 9,78E-03 | 7,40  | 1,46E-02 | 22 | <i>ZBED4</i>   | zinc finger, BED-type containing 4                |
| 8144758 | 1,01  | 9,72E-01 | -1,25 | 2,07E-02 | -1,24 | 2,87E-02 | 9,69  | 1,56E-02 | 8  | <i>ZDHHC2</i>  | zinc finger, DHHC-type containing 2               |
| 7940051 | -1,02 | 9,03E-01 | -1,09 | 5,90E-02 | -1,11 | 2,38E-02 | 8,68  | 2,79E-02 | 11 | <i>ZDHHC5</i>  | zinc finger, DHHC-type containing 5               |
| 8173457 | 1,02  | 8,91E-01 | -1,13 | 3,68E-02 | -1,10 | 1,20E-01 | 7,25  | 4,83E-02 | X  | <i>ZMYM3</i>   | zinc finger, MYM-type 3                           |
| 8090364 | -1,00 | 9,91E-01 | 1,20  | 3,86E-02 | 1,19  | 4,82E-02 | 6,35  | 3,31E-02 | 3  | <i>ZXDC</i>    | ZXD family zinc finger C                          |

|         |       |          |       |          |       |          |       |          |     |     |     |
|---------|-------|----------|-------|----------|-------|----------|-------|----------|-----|-----|-----|
| 7928547 | -1,02 | 9,44E-01 | 1,17  | 2,02E-02 | 1,15  | 4,03E-02 | 10,38 | 1,82E-02 | 10  | --- | --- |
| 8180418 | 1,01  | 9,56E-01 | -1,14 | 3,90E-02 | -1,13 | 7,47E-02 | 9,69  | 4,09E-02 | --- | --- | --- |
| 7995328 | -1,03 | 9,15E-01 | 1,20  | 3,06E-02 | 1,17  | 8,21E-02 | 8,52  | 3,51E-02 | 16  | --- | --- |
| 7919129 | 1,19  | 5,26E-01 | 1,20  | 2,34E-01 | 1,42  | 1,35E-02 | 8,49  | 2,68E-02 | 1   | --- | --- |
| 7995330 | -1,03 | 9,11E-01 | 1,17  | 3,97E-02 | 1,14  | 1,12E-01 | 8,32  | 4,98E-02 | 16  | --- | --- |
| 7989218 | -1,13 | 7,84E-01 | 1,84  | 1,33E-03 | 1,62  | 5,71E-03 | 8,31  | 6,57E-04 | 15  | --- | --- |
| 8003465 | -1,01 | 9,75E-01 | 1,16  | 1,27E-02 | 1,15  | 1,37E-02 | 8,27  | 7,04E-03 | 16  | --- | --- |
| 8063549 | -1,05 | 8,30E-01 | 1,22  | 1,65E-02 | 1,16  | 8,23E-02 | 8,12  | 2,02E-02 | 20  | --- | --- |
| 8154227 | 1,25  | 4,83E-01 | 1,29  | 1,60E-01 | 1,62  | 5,67E-03 | 8,01  | 1,26E-02 | 9   | --- | --- |
| 8100962 | 1,02  | 9,45E-01 | 1,17  | 2,51E-02 | 1,19  | 1,13E-02 | 7,94  | 1,08E-02 | 4   | --- | --- |
| 7897661 | 1,00  | 9,90E-01 | 1,12  | 4,39E-02 | 1,12  | 4,12E-02 | 7,85  | 3,29E-02 | 1   | --- | --- |
| 7970565 | -1,01 | 9,71E-01 | 1,19  | 1,18E-02 | 1,18  | 1,28E-02 | 7,74  | 6,23E-03 | 13  | --- | --- |
| 8154207 | 1,29  | 2,41E-01 | 1,32  | 8,27E-02 | 1,71  | 3,82E-04 | 7,73  | 1,32E-03 | 9   | --- | --- |
| 7977103 | -1,03 | 9,05E-01 | 1,27  | 4,78E-03 | 1,23  | 8,83E-03 | 7,73  | 2,58E-03 | 14  | --- | --- |
| 7911047 | 1,00  | 9,85E-01 | 1,13  | 5,85E-02 | 1,13  | 5,71E-02 | 7,52  | 4,87E-02 | 1   | --- | --- |
| 8042306 | 1,15  | 6,93E-01 | 1,42  | 2,29E-02 | 1,63  | 8,58E-04 | 7,37  | 1,89E-03 | 2   | --- | --- |
| 8154209 | 1,24  | 3,18E-01 | 1,16  | 3,49E-01 | 1,44  | 1,03E-02 | 7,37  | 1,98E-02 | 9   | --- | --- |
| 8164694 | 1,10  | 8,32E-01 | 1,34  | 8,27E-02 | 1,47  | 1,87E-02 | 7,23  | 2,72E-02 | 9   | --- | --- |
| 8175438 | 1,02  | 9,56E-01 | 1,22  | 4,62E-02 | 1,24  | 2,89E-02 | 7,21  | 2,70E-02 | X   | --- | --- |
| 8154868 | -1,05 | 9,11E-01 | 1,47  | 1,17E-02 | 1,40  | 2,50E-02 | 7,19  | 8,26E-03 | 9   | --- | --- |
| 8091809 | -1,02 | 9,43E-01 | 1,23  | 1,56E-02 | 1,21  | 2,90E-02 | 7,18  | 1,23E-02 | 3   | --- | --- |
| 8163424 | 1,06  | 8,48E-01 | 1,25  | 2,94E-02 | 1,32  | 4,81E-03 | 7,18  | 6,76E-03 | 9   | --- | --- |
| 7979127 | 1,01  | 9,61E-01 | 1,22  | 5,76E-03 | 1,24  | 1,50E-03 | 7,09  | 1,23E-03 | 14  | --- | --- |

|         |       |          |       |          |      |          |      |          |     |     |     |
|---------|-------|----------|-------|----------|------|----------|------|----------|-----|-----|-----|
| 8105321 | 1,18  | 2,33E-01 | 1,22  | 4,22E-02 | 1,44 | 9,20E-05 | 6,84 | 3,81E-04 | 5   | --- | --- |
| 7934717 | 1,27  | 2,02E-01 | 1,32  | 4,13E-02 | 1,68 | 6,80E-05 | 6,76 | 2,88E-04 | --- | --- | --- |
| 8013915 | 1,01  | 9,58E-01 | 1,18  | 1,16E-02 | 1,19 | 3,99E-03 | 6,76 | 3,42E-03 | 17  | --- | --- |
| 8099668 | -1,02 | 9,58E-01 | 1,27  | 2,78E-02 | 1,24 | 4,80E-02 | 6,75 | 2,56E-02 | 4   | --- | --- |
| 8071595 | 1,00  | 9,95E-01 | 1,16  | 3,62E-02 | 1,17 | 3,52E-02 | 6,58 | 2,63E-02 | 22  | --- | --- |
| 7972215 | 1,31  | 1,51E-01 | 1,30  | 7,29E-02 | 1,69 | 1,10E-04 | 6,47 | 5,07E-04 | 13  | --- | --- |
| 7974479 | 1,02  | 9,64E-01 | 1,22  | 4,25E-02 | 1,24 | 2,95E-02 | 6,46 | 2,63E-02 | 14  | --- | --- |
| 8098547 | 1,25  | 1,69E-01 | 1,07  | 6,54E-01 | 1,34 | 1,75E-02 | 6,43 | 2,31E-02 | 4   | --- | --- |
| 8129675 | 1,00  | 9,85E-01 | 1,14  | 3,72E-02 | 1,15 | 3,17E-02 | 6,28 | 2,54E-02 | 6   | --- | --- |
| 8117698 | -1,01 | 9,58E-01 | 1,16  | 1,71E-02 | 1,15 | 2,83E-02 | 6,26 | 1,39E-02 | 6   | --- | --- |
| 7917672 | 1,02  | 9,10E-01 | 1,16  | 9,29E-03 | 1,18 | 1,55E-03 | 6,21 | 1,75E-03 | 1   | --- | --- |
| 7995346 | -1,08 | 5,46E-01 | 1,17  | 1,57E-02 | 1,09 | 2,79E-01 | 6,20 | 2,39E-02 | 16  | --- | --- |
| 7933113 | 1,01  | 9,94E-01 | 1,35  | 3,39E-02 | 1,36 | 3,07E-02 | 6,15 | 2,32E-02 | 10  | --- | --- |
| 7975455 | 1,06  | 8,83E-01 | 1,33  | 1,85E-02 | 1,40 | 3,66E-03 | 6,11 | 4,55E-03 | 14  | --- | --- |
| 8059578 | 1,17  | 3,41E-01 | 1,12  | 3,37E-01 | 1,31 | 1,11E-02 | 6,10 | 2,15E-02 | 2   | --- | --- |
| 8114898 | 1,63  | 1,52E-02 | -1,25 | 2,49E-01 | 1,30 | 2,22E-01 | 6,02 | 1,24E-02 | 5   | --- | --- |
| 7945069 | 1,02  | 9,33E-01 | 1,16  | 1,41E-02 | 1,19 | 4,15E-03 | 5,94 | 4,16E-03 | 11  | --- | --- |
| 7933634 | 1,30  | 2,86E-01 | 1,46  | 2,48E-02 | 1,90 | 6,70E-05 | 5,85 | 2,47E-04 | 10  | --- | --- |
| 8142405 | 1,05  | 8,36E-01 | 1,17  | 8,72E-02 | 1,24 | 2,08E-02 | 5,83 | 3,04E-02 | 7   | --- | --- |
| 7969772 | 1,01  | 9,83E-01 | 1,14  | 6,03E-02 | 1,15 | 5,71E-02 | 5,81 | 4,93E-02 | 13  | --- | --- |
| 8104607 | 1,02  | 9,82E-01 | 2,22  | 1,18E-03 | 2,27 | 2,31E-04 | 5,80 | 1,40E-04 | 5   | --- | --- |
| 8174977 | 1,01  | 9,57E-01 | 1,13  | 4,53E-02 | 1,14 | 2,90E-02 | 5,79 | 2,68E-02 | X   | --- | --- |
| 8124055 | 1,05  | 8,55E-01 | 1,20  | 4,93E-02 | 1,25 | 1,07E-02 | 5,77 | 1,50E-02 | 6   | --- | --- |

|         |       |          |      |          |      |          |      |          |     |     |     |
|---------|-------|----------|------|----------|------|----------|------|----------|-----|-----|-----|
| 8146328 | 1,10  | 5,69E-01 | 1,11 | 2,60E-01 | 1,23 | 2,10E-02 | 5,77 | 3,89E-02 | 8   | --- | --- |
| 8173162 | 1,10  | 7,81E-01 | 1,23 | 1,35E-01 | 1,35 | 2,62E-02 | 5,76 | 4,13E-02 | X   | --- | --- |
| 8027429 | 1,30  | 2,13E-01 | 1,05 | 7,89E-01 | 1,37 | 4,35E-02 | 5,71 | 4,80E-02 | 19  | --- | --- |
| 8001680 | -1,06 | 7,90E-01 | 1,22 | 2,23E-02 | 1,15 | 1,44E-01 | 5,62 | 3,23E-02 | 16  | --- | --- |
| 8100941 | 1,23  | 7,43E-01 | 1,43 | 1,80E-01 | 1,75 | 2,95E-02 | 5,60 | 4,96E-02 | 4   | --- | --- |
| 8151764 | 1,07  | 7,75E-01 | 1,21 | 3,61E-02 | 1,29 | 3,37E-03 | 5,58 | 5,74E-03 | 8   | --- | --- |
| 8180252 | 1,02  | 9,00E-01 | 1,13 | 3,12E-02 | 1,16 | 9,28E-03 | 5,57 | 1,07E-02 | --- | --- | --- |
| 8091552 | 1,05  | 7,09E-01 | 1,10 | 1,28E-01 | 1,15 | 1,49E-02 | 5,49 | 2,68E-02 | 3   | --- | --- |
| 7950762 | -1,04 | 8,76E-01 | 1,22 | 2,68E-02 | 1,16 | 1,03E-01 | 5,45 | 3,47E-02 | 11  | --- | --- |
| 8097472 | -1,05 | 7,75E-01 | 1,19 | 1,42E-02 | 1,13 | 9,75E-02 | 5,33 | 1,80E-02 | 4   | --- | --- |
| 8102869 | 1,02  | 9,41E-01 | 1,14 | 6,23E-02 | 1,16 | 3,56E-02 | 5,21 | 3,74E-02 | 4   | --- | --- |
| 8128549 | 1,14  | 2,29E-01 | 1,04 | 6,32E-01 | 1,19 | 2,54E-02 | 5,15 | 3,44E-02 | 6   | --- | --- |
| 8047241 | -1,03 | 9,30E-01 | 1,24 | 2,68E-02 | 1,21 | 6,18E-02 | 4,96 | 2,77E-02 | 2   | --- | --- |
| 7989193 | 1,09  | 8,75E-01 | 1,37 | 6,48E-02 | 1,49 | 1,88E-02 | 4,94 | 2,53E-02 | 15  | --- | --- |
| 8026420 | -1,00 | 9,93E-01 | 1,15 | 4,93E-02 | 1,15 | 6,21E-02 | 4,90 | 4,48E-02 | 19  | --- | --- |
| 8159961 | 1,49  | 1,24E-01 | 1,18 | 4,73E-01 | 1,76 | 4,63E-03 | 4,88 | 7,99E-03 | 9   | --- | --- |
| 8142464 | 1,05  | 8,90E-01 | 1,36 | 1,18E-02 | 1,43 | 1,83E-03 | 4,88 | 2,42E-03 | 7   | --- | --- |
| 7907966 | 1,00  | 9,94E-01 | 1,23 | 2,41E-02 | 1,23 | 2,07E-02 | 4,87 | 1,48E-02 | 1   | --- | --- |
| 8008038 | 1,13  | 6,11E-01 | 1,20 | 1,28E-01 | 1,36 | 8,09E-03 | 4,86 | 1,64E-02 | 17  | --- | --- |
| 8166351 | -1,05 | 8,17E-01 | 1,19 | 2,43E-02 | 1,14 | 1,34E-01 | 4,85 | 3,43E-02 | X   | --- | --- |
| 8121269 | 1,14  | 3,66E-02 | 1,10 | 9,04E-02 | 1,26 | 2,90E-05 | 4,83 | 1,22E-04 | 6   | --- | --- |
| 7945942 | 1,06  | 8,75E-01 | 1,22 | 9,15E-02 | 1,30 | 2,94E-02 | 4,78 | 3,94E-02 | 11  | --- | --- |
| 7925448 | 1,12  | 5,27E-01 | 1,16 | 1,49E-01 | 1,30 | 6,65E-03 | 4,77 | 1,40E-02 | 1   | --- | --- |

|         |       |          |      |          |      |          |      |          |     |     |     |
|---------|-------|----------|------|----------|------|----------|------|----------|-----|-----|-----|
| 8154217 | 1,22  | 2,35E-01 | 1,08 | 5,59E-01 | 1,33 | 1,86E-02 | 4,74 | 2,76E-02 | 9   | --- | --- |
| 8136059 | -1,00 | 9,94E-01 | 1,16 | 3,50E-02 | 1,16 | 4,12E-02 | 4,70 | 2,76E-02 | 7   | --- | --- |
| 7948033 | 1,01  | 9,63E-01 | 1,18 | 5,70E-02 | 1,20 | 4,36E-02 | 4,69 | 4,06E-02 | 11  | --- | --- |
| 8171203 | -1,01 | 9,64E-01 | 1,20 | 1,56E-02 | 1,19 | 2,10E-02 | 4,67 | 1,05E-02 | X   | --- | --- |
| 8129390 | 1,12  | 7,37E-01 | 1,38 | 2,60E-02 | 1,55 | 1,50E-03 | 4,65 | 3,06E-03 | 6   | --- | --- |
| 7932612 | -1,03 | 9,02E-01 | 1,16 | 2,67E-02 | 1,13 | 7,93E-02 | 4,64 | 3,09E-02 | 10  | --- | --- |
| 8120756 | 1,28  | 6,26E-01 | 1,38 | 1,92E-01 | 1,76 | 1,63E-02 | 4,61 | 3,11E-02 | 6   | --- | --- |
| 8157281 | 1,04  | 8,92E-01 | 1,16 | 9,06E-02 | 1,20 | 3,58E-02 | 4,54 | 4,52E-02 | 9   | --- | --- |
| 8146788 | 1,00  | 9,96E-01 | 1,21 | 3,49E-02 | 1,21 | 3,52E-02 | 4,54 | 2,56E-02 | 8   | --- | --- |
| 7934883 | 1,00  | 9,94E-01 | 1,14 | 3,38E-02 | 1,15 | 3,06E-02 | 4,54 | 2,32E-02 | 10  | --- | --- |
| 8180204 | 1,12  | 8,63E-02 | 1,03 | 6,64E-01 | 1,15 | 8,71E-03 | 4,50 | 1,08E-02 | --- | --- | --- |
| 8136932 | 1,13  | 6,79E-01 | 1,21 | 1,44E-01 | 1,37 | 1,36E-02 | 4,48 | 2,58E-02 | 7   | --- | --- |
| 8051462 | 1,24  | 2,08E-01 | 1,04 | 7,85E-01 | 1,29 | 4,23E-02 | 4,44 | 4,60E-02 | 2   | --- | --- |
| 8168731 | 1,08  | 6,79E-01 | 1,12 | 2,01E-01 | 1,21 | 2,31E-02 | 4,39 | 4,12E-02 | X   | --- | --- |
| 7962246 | 1,02  | 9,28E-01 | 1,16 | 5,02E-02 | 1,19 | 2,43E-02 | 4,35 | 2,60E-02 | 12  | --- | --- |
| 7925056 | 1,03  | 9,70E-01 | 1,61 | 2,29E-02 | 1,65 | 1,39E-02 | 4,35 | 1,15E-02 | 1   | --- | --- |
| 7948037 | 1,15  | 5,20E-01 | 1,16 | 2,24E-01 | 1,32 | 1,21E-02 | 4,29 | 2,39E-02 | 11  | --- | --- |
| 8155528 | 1,33  | 3,74E-01 | 1,28 | 2,41E-01 | 1,71 | 6,89E-03 | 4,19 | 1,43E-02 | 9   | --- | --- |
| 7923440 | 1,14  | 8,90E-01 | 1,90 | 3,76E-02 | 2,16 | 1,07E-02 | 4,17 | 1,30E-02 | 1   | --- | --- |
| 7997498 | -1,04 | 7,93E-01 | 1,15 | 2,85E-02 | 1,10 | 1,78E-01 | 4,14 | 4,37E-02 | 16  | --- | --- |
| 7959144 | 1,06  | 6,62E-01 | 1,08 | 1,97E-01 | 1,14 | 2,07E-02 | 4,11 | 3,74E-02 | 12  | --- | --- |
| 8139778 | -1,01 | 9,71E-01 | 1,23 | 1,11E-02 | 1,22 | 1,11E-02 | 3,98 | 5,14E-03 | 7   | --- | --- |
| 8097809 | 1,04  | 7,39E-01 | 1,10 | 6,95E-02 | 1,15 | 7,32E-03 | 3,97 | 1,28E-02 | 4   | --- | --- |

|         |       |          |       |          |       |          |      |          |    |     |     |
|---------|-------|----------|-------|----------|-------|----------|------|----------|----|-----|-----|
| 8143599 | 1,18  | 4,33E-01 | 1,16  | 2,76E-01 | 1,37  | 1,21E-02 | 3,91 | 2,37E-02 | 7  | --- | --- |
| 7916725 | -1,05 | 8,28E-01 | 1,19  | 2,52E-02 | 1,14  | 1,29E-01 | 3,78 | 3,51E-02 | 1  | --- | --- |
| 7907964 | 1,22  | 4,24E-01 | 1,18  | 2,98E-01 | 1,44  | 1,32E-02 | 3,73 | 2,58E-02 | 1  | --- | --- |
| 8142169 | 1,12  | 4,62E-01 | 1,19  | 4,69E-02 | 1,32  | 6,46E-04 | 3,60 | 1,89E-03 | 7  | --- | --- |
| 7979414 | 1,11  | 3,54E-01 | 1,09  | 2,46E-01 | 1,22  | 6,36E-03 | 3,30 | 1,34E-02 | 14 | --- | --- |
| 8045559 | 1,02  | 9,70E-01 | 1,42  | 2,17E-02 | 1,45  | 1,28E-02 | 3,27 | 1,03E-02 | 2  | --- | --- |
| 7942985 | 1,05  | 7,59E-01 | 1,10  | 1,40E-01 | 1,16  | 2,29E-02 | 3,22 | 3,79E-02 | 11 | --- | --- |
| 7946328 | 1,14  | 5,87E-01 | 1,16  | 2,23E-01 | 1,32  | 1,71E-02 | 3,15 | 3,31E-02 | 11 | --- | --- |
| 7942525 | 1,00  | 9,94E-01 | 1,15  | 4,41E-02 | 1,16  | 4,37E-02 | 3,01 | 3,43E-02 | 11 | --- | --- |
| 8082572 | 1,05  | 8,61E-01 | 1,28  | 1,43E-02 | 1,35  | 1,72E-03 | 2,88 | 2,58E-03 | 3  | --- | --- |
| 8055594 | 1,08  | 8,04E-01 | 1,30  | 2,00E-02 | 1,41  | 1,72E-03 | 2,82 | 3,06E-03 | 2  | --- | --- |
| 8114213 | -1,20 | 1,94E-01 | -1,14 | 2,24E-01 | -1,36 | 1,57E-03 | 2,82 | 4,16E-03 | 5  | --- | --- |
| 8151205 | -1,11 | 2,59E-01 | -1,04 | 6,08E-01 | -1,16 | 2,81E-02 | 2,78 | 3,89E-02 | 8  | --- | --- |
| 8053364 | -1,03 | 8,02E-01 | 1,12  | 3,05E-02 | 1,08  | 1,83E-01 | 2,72 | 4,66E-02 | 2  | --- | --- |

22 Abbreviations in order of appearance: CA, controlled asthma; Ctrl, healthy controls; SA, severe asthma; FC, fold change; AveExpr, average  
 23 expression value; F, F-test statistics, Chr, chromosome. \*Benjamini and Hochberg's correction for multiple testing.
